1 **Geographical and environmental contributions to genomic divergence in**  
2 **mangrove forests**

3

4 Michele Fernandes da Silva<sup>1,2</sup>, Mariana Vargas Cruz<sup>1,2</sup>, João de Deus Vidal Júnior<sup>1,2</sup>, Maria  
5 Imaculada Zucchi<sup>3</sup>, Gustavo Maruyama Mori<sup>4</sup>, and Anete Pereira de Souza<sup>1,2</sup>

6

7 <sup>1</sup>Department of Plant Biology, Institute of Biology, University of Campinas (UNICAMP),  
8 Campinas, SP, 13083-863, Brazil

9 <sup>2</sup>Center for Molecular Biology and Genetic Engineering, University of Campinas  
10 (UNICAMP), Campinas, SP, 13083-875, Brazil

11 <sup>3</sup>São Paulo Agency for Agribusiness Technology (APTA), Piracicaba, SP, 13400-790, Brazil

12 <sup>4</sup>Institute of Biosciences, São Paulo State University (UNESP), São Vicente, SP, 11330-900,  
13 Brazil

14

15 **CORRESPONDING AUTHOR:** Anete Pereira de Souza

16 Center for Molecular Biology and Genetic Engineering, University of Campinas  
17 (UNICAMP). Avenue Cândido Rondon, 400, Campinas, SP, 13083-875, Brazil.

18 Telephone number: +55 19 3521 1132

19 E-mail: anete@unicamp.br

20

21 **SHORT RUNNING TITLE: Isolation by environment in mangroves**

22

23 **ABSTRACT**

24 Assessing the relative importance of geographical and environmental factors to the spatial  
25 distribution of genetic variation can provide information about the processes that maintain  
26 genetic variation in natural populations. With a globally wide but very restricted habitat  
27 distribution, mangrove trees are a useful model for studies aiming to understand the  
28 contributions of these factors. Mangroves occur along the continent–ocean interface of  
29 tropical and subtropical latitudes, regions considered inhospitable to many other types of  
30 plants. Here, we used landscape genomics approaches to investigate the relative  
31 contributions of geographical and environmental variables to the genetic variation of two  
32 black mangrove species, *Avicennia schaueriana* and *Avicennia germinans*, along the South  
33 American coast. Using single nucleotide polymorphisms, our results revealed an important  
34 role of ocean currents and geographical distance in the gene flow of *A. schaueriana* and an  
35 isolation-by-environment pattern in the organization of the genetic diversity of *A. germinans*.  
36 Additionally, for *A. germinans*, we observed significant correlations between genetic  
37 variation with evidence of selection and the influence of precipitation regimens, solar  
38 radiation and temperature patterns. These discoveries expand our knowledge about the  
39 evolution of mangrove trees and provide important information to predict future responses of  
40 coastal species to the expected global changes during this century.

41

42 **KEYWORDS:** adaptation of mangroves - coastal ecology - environmental gradient -  
43 isolation by barrier - isolation by distance - molecular ecology.

## 44 INTRODUCTION

45 Environmental and geographical variation often affects the distribution of allele frequencies  
46 in natural populations by facilitating or limiting gene flow across space and driving selection  
47 of certain genotypes (Wang *et al.*, 2013; Sork, 2016; Murray *et al.*, 2019). For example,  
48 under an isolation-by-distance (IBD) model (Wright, 1943), geographical distance might  
49 limit dispersal, leading to the accumulation of divergences in allele frequency by genetic  
50 drift (Bradburd *et al.*, 2013). Furthermore, under the isolation-by-barrier (IBB) model, a  
51 barrier to gene flow might abruptly reduce or even disrupt connectivity between individuals  
52 of a species (Barton, 1979). In addition to these models, genetic differentiation can increase  
53 in response to environmental differences, regardless of the geographical distance. This  
54 pattern, described by the isolation-by-environment (IBE) model (Wang & Bradburd, 2014),  
55 can be generated by a variety of ecological processes, such as selection against immigrants,  
56 leading to the evolution of locally adapted populations (Bradburd *et al.*, 2013).

57 The IBD, IBB and IBE models are not mutually exclusive and often co-occur in  
58 nature (Wang, 2013; Sexton *et al.*, 2014). Studies aiming to determine the factors that  
59 control the distribution patterns of genetic variation across space can provide relevant  
60 information about the underlying processes that generate and maintain genetic variation in  
61 natural populations (Lee & Mitchell-Olds, 2011; Wang & Bradburd, 2014). This knowledge  
62 is essential to predict future responses of current populations to environmental changes  
63 (Vincent *et al.*, 2013) and can contribute to decision-making processes aiming to minimize  
64 future biodiversity loss (Kovach *et al.*, 2012; Muñoz *et al.*, 2015; Wee *et al.*, 2019).

65 The field of research that seeks to clarify the roles of these factors in the distribution  
66 of the neutral and adaptive genetic variability of a species over space is known as landscape  
67 genomics (Joost *et al.*, 2007; Lowry, 2010; Schoville *et al.*, 2012; Vincent *et al.*, 2013).

68 Recently, this approach has been applied increasingly to the study of non-model organisms

69 (Storfer *et al.*, 2018). Nevertheless, landscape genomic studies are mostly limited to animal  
70 species, whereas studies on plants, especially tropical trees (Storfer *et al.*, 2010), remain very  
71 limited despite their fundamental roles in global biogeochemical cycles (Jasechko *et al.*,  
72 2013) and as habitat providers to most terrestrial biodiversity (Mannion *et al.*, 2014).

73 As sessile organisms, trees respond directly to the environment in which they live  
74 (Holderegger *et al.*, 2010). Conversely, they often have high levels of gene flow, which tend  
75 to reduce the strength of natural selection (Savolainen *et al.*, 2007). Thus, tree species that  
76 often occur across wide latitudinal ranges along environmental gradients, such as mangrove  
77 forests (Tomlinson, 1986), represent a promising biological model to investigate and  
78 understand the effects of the environment on microevolutionary processes and population  
79 dynamics.

80 Mangrove trees occur in a narrow area along the continent–ocean interface  
81 (Tomlinson, 1986; Hamilton, 2020) of tropical and subtropical latitudes of the world, mainly  
82 between 30°N and 30°S (Giri *et al.*, 2011). These species produce floating seeds or fruits,  
83 referred to as ‘propagules’ (Tomlinson, 1986), which can disperse over long distances via  
84 rivers and ocean surface currents (Van der Stocken *et al.*, 2019b). Their geographical  
85 distribution is limited by the topography of the intertidal zone (Middleton, 2012) and,  
86 frequently, by the occurrence of low temperatures (Morrisey *et al.*, 2010) and by patterns of  
87 precipitation (Spalding *et al.*, 1997). However, environmental variations in their boundaries  
88 are associated with different climatic thresholds (Osland *et al.*, 2017; Cavanaugh *et al.*,  
89 2018) and oceanographic conditions (Soares *et al.*, 2012; Saintilan *et al.*, 2020).

90 *Avicennia* L. (Acanthaceae) is one of the most diverse and widely distributed  
91 mangrove genera globally (Duke, 1991; Li *et al.*, 2016) and is highly abundant on the  
92 Western Atlantic coastline (Schaeffer-Novelli *et al.*, 1990). In this region, *Avicennia* is  
93 represented mainly by two of the three New World *Avicennia* species, namely, *Avicennia*

94 *germinans* (L.) L. and *Avicennia schaueriana* Stapf & Leechman ex Moldenke (Schaeffer-  
95 Novelli *et al.*, 1990; Duke, 1991). These species present a partly sympatric distribution on  
96 the South American coast, where they share a remarkable north– south pattern of genetic  
97 divergence, as revealed by selectively neutral microsatellites (Mori *et al.*, 2015) and single  
98 nucleotide polymorphisms (SNPs) (Cruz *et al.*, 2019, 2020). A similar pattern of putatively  
99 neutral genetic diversity has also been observed in other coastal species, such as *Rhizophora*  
100 *mangle* (Pil *et al.*, 2011; Francisco *et al.*, 2018) and the mangrove- associated tree *Hibiscus*  
101 *pernambucensis* (Takayama *et al.*, 2008). These findings probably indicate a prominent role  
102 of the dispersal of floating propagules in shaping the overlapping north–south genetic  
103 divergence of these trees, given the bifurcation of the South Equatorial Current (SEC) along  
104 the Atlantic coast of South America (Lumpkin & Johnson, 2013).

105         In addition to neutral processes that shape the diversity of *Avicennia* species in this  
106 region, recent studies have identified various genomic regions that might be associated with  
107 adaptive processes relevant to the environmental context of mangroves (Cruz *et al.*, 2019,  
108 2020). These variations have been attributed to climatic and oceanographic factors that vary  
109 widely along the latitudinal gradient of the species distribution. Although these studies  
110 provide insights into the role of the environment in the organization of the adaptive genetic  
111 variation in *A. schaueriana* and *A. germinans*, the relative importance of neutral and non-  
112 neutral abiotic factors remains unknown.

113         In this study, we explore the relative contributions of geographical and environmental  
114 factors to the organization of the genetic diversity of *A. schaueriana* and *A. germinans* along  
115 the Atlantic coast of South America. We collect previously published genetic information  
116 and spatial and environmental data and conduct landscape genetic analyses to assess the  
117 hypothesis that geographical distance, SEC bifurcation and climatic, oceanographic and tidal  
118 variations drive population genetic differentiation of the two species, i.e. IBD, IBB and IBE

119 models. Considering the genetic structure inferred in previous studies (Cruz *et al.*, 2019,  
120 2020; Mori *et al.*, 2015) and the environmental heterogeneity throughout the species  
121 distribution, we expect that IBB and IBE will be the main models underlying the  
122 geographical distance for both species. Finally, after identifying the factors influencing the  
123 distributions of the genetic diversity for *A. schaueriana* and *A. germinans*, we discuss the  
124 implications for conservation and provide suggestions to improve the long-term resilience of  
125 the two black mangrove species.

126

## 127 MATERIAL AND METHODS

128

### 129 *Biological materials and genotyping of SNP markers*

130

131 Biological materials were collected and SNP markers identified as described in previous  
132 studies by Cruz *et al.* (2019) for *A. schaueriana* and by Cruz *et al.* (2020) for *A. germinans*.  
133 Briefly, 77 *A. schaueriana* individuals were sampled from ten different locations and 48 *A.*  
134 *germinans* from six different locations along the Brazilian coast (Fig. 1 and Table 1).  
135 Assembly, mapping and SNP locus identification were performed using custom scripts  
136 (SNPsaurus, LLC), which created a reference catalogue of abundant reads, retaining biallelic  
137 loci present in  $\geq 10\%$  of the samples. High-quality sequences were used, allowing a  
138 maximum of 65% of missing data and one SNP per sequence and requiring a minimum  
139 coverage of  $8\times$  and a minor allele frequency  $\geq 0.05$  using Vcftools v.0.1.12b (Danecek *et al.*,  
140 2011). A maximum reading cover of 56 was used (resulting from the product with the  
141 average read depth and a standard deviation of 1.5 from the average) to reduce the paralogy  
142 or low-quality genotype calls. In total, 6170 and 2297 SNP markers were identified for *A.*  
143 *schaueriana* and *A. germinans*, respectively.

144

### 145 ***Detection of SNP loci with signatures of natural selection***

146 The SNP loci with evidence of natural selection were identified previously by Cruz *et al.*  
147 (2019, 2020). For *A. schaueriana*, 86 loci showed considerable deviations from neutral  
148 expectations of interpopulation divergence. They were detected using two methods to  
149 minimize false positives: LOSITAN (Antao *et al.*, 2008), with a confidence interval of 0.99  
150 and a false-discovery rate (FDR) of 0.1, and *pcadapt* (Luu *et al.*, 2017), with an FDR of 0.1.  
151 For *A. germinans*, 25 loci showed considerable deviations from the neutral expectations of  
152 interpopulation divergence. For the latter species, in addition to LOSITAN (a confidence  
153 interval of 0.99 and an FDR of 0.05) and *pcadapt* (an FDR of 0.05), SNP loci associated  
154 with ecological variables were detected using latent factor mixed models (LFMM)  
155 implemented in the *LEA* package (Frichot & François, 2015).

156

### 157 ***Estimation of genetic distances***

158 To analyse the importance of geographical distance, oceanographic barriers and  
159 environmental variables in spatial genetic divergence, we evaluated which model (IBD, IBB  
160 or IBE) best described the distribution of the genetic diversity of each species based on  
161 genome-wide SNP markers. To that end, we estimated the pairwise genetic differentiation  
162 (Wright's *F<sub>ST</sub>*; Wright, 1949) for the total set of SNP molecular markers and for the set of  
163 SNP markers with evidence of selection using the *Hierfstat* package (Goudet, 2005) for R  
164 v.3.6.2 (R Core Team, 2019).

165

### 166 ***Geographical and environmental distances and the oceanographic barrier***

167 Pairwise geographical distances among populations were measured using the geographical  
168 coordinates of the sampling sites (Table 1) with the global positioning system (Garmin

169 76CSx, WGS-84 standard; Garmin International Inc., Olathe, KS, USA). Distances between  
170 points were estimated based on the contour of the Brazilian coast; thus, we considered  
171 floating propagule-mediated dispersal (Van der Stocken *et al.*, 2019a). A binary matrix (zero  
172 or one) was constructed based on the presence (one) or absence (zero) of the supposed  
173 oceanographic barrier between each pair of sampling sites to determine the relative  
174 significance of the pattern of splitting of the SEC into the Brazil Current (BC) and the North  
175 Brazil Current (NBC) (Lumpkin & Johnson, 2013) (Fig. 1) for *A. schaueriana* and *A.*  
176 *germinans* propagules (Cushman *et al.*, 2006; Robertson *et al.*, 2009; Legendre & Legendre,  
177 2012; Wu *et al.*, 2016).

178 We obtained 42 environmental variables for each sampling site, with a resolution of  
179 30 arc-s (~1 km in Ecuador), to evaluate the overall effect of the environment on the  
180 distribution of genetic variation. In our dataset, we included 27 climatic variables derived  
181 from the WorldClim temperature and precipitation datasets (v.1.4 and v.2.0; Fick &  
182 Hijmans, 2017), ten oceanographic variables derived the MARSPEC ocean surface salinity  
183 and temperature datasets (Sbrocco & Barber, 2013) and five variables related to tidal  
184 variations retrieved from the Environmental Climate Data Sweden (ECDS) platform (Klein  
185 *et al.*, 2013). We removed variables that showed a high correlation ( $r > 0.8$ ; Supporting  
186 Information, Figure S1), as measured by the *removeCollinearity* function of the  
187 *virtualspecies* package (Leroy *et al.*, 2016) in R (R Core Team, 2019), to avoid non-  
188 independence between environmental variables. We extracted the values of the  
189 environmental variables for our sample points (Supporting Information, Tables S1 and S2)  
190 using the *raster* package (Hijmans, 2017) in R (R Core Team, 2019). For terrestrial  
191 variables, the extraction step was performed for points that overlapped our geographical  
192 coordinates. For oceanographic variables, we used a 5 km buffer around each population  
193 sampled and extracted the mean values inside the buffer; thus, non-terrestrial areas around



194 our sampling sites were included. All occurrence data have been carefully inspected to detect  
195 and correct problems associated with inconsistent records (Chapman, 2005). We transformed  
196 this environmental data matrix using a principal components analysis (PCA). The scores for  
197 the first five and first three principal components that retained > 90% of the variance of the  
198 environmental variables for *A. schaueriana* and *A. germinans*, respectively, were used to  
199 calculate the Euclidean distances between population pairs. The PCA and environmental  
200 distance measurements were all performed in R (R Core Team, 2019).

201

### 202 *Association tests*

203

204 We investigated the relationships between genetic differentiation (both neutral and putatively  
205 non-neutral) and geographical/environmental factors using a combination of Mantel tests  
206 (simple and partial) and matrix regression analysis. Initially, we performed Mantel tests to  
207 assess the correlations between genetic differentiation and the geographical distance,  
208 oceanographic barrier matrix and environmental distance. Next, we conducted partial Mantel  
209 tests (Smouse *et al.*, 2012) to estimate the influence of one factor conditioned to another  
210 factor as a covariate (Legendre, 1993). Both Mantel tests were conducted using the ‘*ecodist*’  
211 package (Goslee & Urban, 2007), with 10 000 permutations.

212 In addition, we performed multiple matrix regression with randomization (MMRR)  
213 using the *MMRR* function in R with 10 000 permutations (Wang, 2013). We used this  
214 method to estimate the independent effect of each factor and quantify how genetic distances  
215 respond to changes in predictor variables. MMRR has proved to be accurate for several types  
216 of conditions (Wang, 2013); however, as in many multiple regression analyses, MMRR can  
217 be biased when the predictor variables are correlated (Wang, 2013). Therefore, we interpret  
218 our results based on this possible limitation.

219 We performed correlations for the set of all populations and also for the set of  
220 samples located northerly from the SEC and for the set of samples located southerly from the  
221 SEC because substantial variations in the genetic structure have been reported at smaller  
222 geographical scales in mangroves located in these regions (Cruz *et al.*, 2019, 2020; Mori *et*  
223 *al.*, 2015). Previous findings indicate that genetic diversity is organized in well-defined  
224 groups at the regional scale for both species and even between individuals of *A. germinans*  
225 that are separated by only a few kilometres (Cruz *et al.*, 2020).

226 Finally, given that IBE was suggested as a useful model to describe the observed  
227 genetic differentiation, we conducted an MMRR analysis and partial Mantel tests for each  
228 environmental variable separately to identify the most crucial environmental factors that  
229 affect genetic distance with evidence of natural selection.

230

## 231 **RESULTS**

232

### 233 ***Genetic, geographical and environmental distances***

234 For the total set of SNP markers, we obtained  $F_{ST}$  values ranging from 0.019 to 0.189 for  
235 pairs of *A. schaueriana* populations and from 0.047 to 0.387 for pairs of *A. germinans*  
236 populations (Fig. 2). For the set of markers with evidence of selection, the  $F_{ST}$  ranged from  
237 0.02 to 0.36 for *A. schaueriana* (Supporting Information, Table S3) and from 0.03 to 0.88 for  
238 *A. germinans* (Supporting Information, Table S4). The pairwise geographical distances  
239 ranged from ~5000 km between Bragança (SB) and Laguna (SL) to 77 km between Cananéia  
240 (SC) and Pontal do Paraná (SP) for *A. schaueriana* (Supporting Information, Table S5) and  
241 from 2100 km between Ilha de Marajó in Soure (GM) and Tamandaré (GT) to 222 km  
242 between Ilha de Marajó in Soure (GM) and Bragança (GB) for *A. germinans* (Supporting  
243 Information, Table S6).

244 After removing highly correlated environmental variables ( $r > 0.8$ ), 23 variables were  
245 retained for analyses of environmental distances (Supporting Information, Tables S7 and  
246 S8). The first five axes of the PCA of *A. schaueriana* retained 97% of the variance of the  
247 environmental variables used to calculate the environmental distance between the sampling  
248 sites (Supporting Information, Tables S9 and S10). For *A. germinans*, this calculation was  
249 performed based on the first three axes of the PCA, which retained 92% of the data variance.  
250 The first two PCA axes for *A. schaueriana* represented 80% of the variance and were  
251 explained mainly by the variations in air temperature and sea surface temperature, the solar  
252 radiation and tidal cycles (Fig. 3A). For *A. germinans*, the first two PCA axes represented  
253 ~80% of the variance and were explained mainly by the air temperature variation,  
254 precipitation regimens, vapour pressure deficit and solar radiation (Fig. 3B).

255

#### 256 *Association tests*

257

258 For *A. schaueriana*, simple Mantel tests that included all SNP loci revealed significant  
259 correlations between genetic distance and the three predictor variables, namely, geographical  
260 distance ( $r = 0.9$ ,  $P < 0.001$ ), environmental distance ( $r = 0.73$ ,  $P < 0.001$ ) and oceanographic  
261 barrier matrix ( $r = 0.96$ ,  $P < 0.01$ ) (Table 2 and Fig. 4). However, all predictor variables were  
262 also highly correlated with each other (geographical vs. environmental distance:  $r = 0.9$ ,  $P <$   
263  $0.001$ , (Fig. 4); geographical distance vs. oceanographic barrier:  $r = 0.87$ ,  $P < 0.01$ ;  
264 environmental distance vs. oceanographic barrier:  $r = 0.72$ ,  $P < 0.01$ ). When the influence of  
265 the other two factors was controlled in partial Mantel tests, the associations between genetic  
266 distance and geographical distance and between genetic distance and the oceanographic  
267 barrier matrix remained significant, whereas the correlation between genetic differentiation  
268 and environmental distance was not significant (Table 2). In addition, the multivariate

269 regression analysis with the combined effect of the three predictor variables on the genetic  
270 distance did not show significant results for the environment ( $\beta_{\text{geographical}} = 0.48, P < 0.01$ ;  
271  $\beta_{\text{environment}} = -0.18, P = 0.14$ ;  $\beta_{\text{ocean barrier}} = 0.67, P < 0.01$ ; Table 3), and when this factor was  
272 removed, the oceanographic barrier variable provided a relatively higher contribution than the  
273 geographical distance ( $\beta_{\text{geographical}} = 0.25, P < 0.01$ ;  $\beta_{\text{ocean barrier}} = 0.73, P < 0.01$ ; Table 3).  
274 When the tests were performed separately for sampling sites located to the north and south of  
275 the SEC, we observed significant correlations only between genetic and geographical  
276 distances (partial Mantel:  $r = 0.88, P = 0.01$ ; MMRR:  $\beta_{\text{geographical}} = 0.10, P = 0.01$ ;  $\beta_{\text{environment}}$   
277  $= -0.25, P = 0.17$ ) for sampling sites located south of the SEC.

278         For *A. germinans*, the simple Mantel test showed significant results only between the  
279 genetic distance and geographical distance ( $r = 0.78, P < 0.05$ ) and between the genetic  
280 distance and environmental distance ( $r = 0.81, P = 0.01$ ) based on the entire SNP dataset  
281 (Table 4 and Fig. 5). As observed for *A. schaueriana*, the geographical distance was also  
282 correlated with the environmental distance for this species (geographical vs. environmental  
283 distance:  $r = 0.86, P = 0.001$ ; Fig. 5), implying that greater geographical distances correspond  
284 to greater environmental differences. However, the correlations between the oceanographic  
285 barrier matrix and the other two predictor variables were not significant (geographical  
286 distance vs. oceanographic barrier:  $r = 0.79, P = 0.16$ ; environmental distance vs.  
287 oceanographic barrier:  $r = 0.78, P = 0.17$ ). The partial Mantel tests showed significant values  
288 only for the environment, when conditioned on the geographical distance ( $r = 0.45, P = 0.01$ )  
289 (Table 4). In addition, the multivariate regression analysis of the combination of geographical  
290 and environmental distance showed significant values only for the environmental distance,  
291 which exerted an almost twofold greater effect than the geographical distance ( $\beta_{\text{environment}} =$   
292  $0.55, P < 0.05, \beta_{\text{geographical}} = 0.28, P = 0.34$ ) (Table 5). However, when we included the  
293 oceanographic barrier variable in the model, the regression coefficients for the three predictor

294 variables were not significant ( $\beta_{\text{geographical}} = -0.07, P = 0.5$ ;  $\beta_{\text{environment}} = 0.22, P = 0.2$ ;  $\beta_{\text{ocean}}$   
295  $\beta_{\text{barrier}} = 0.84, P = 0.1$ ) (Table 5). When we removed the samples from GT, which was the only  
296 sampling site south of the SEC, the genetic divergence was not correlated with either the  
297 geographical distance (partial Mantel:  $r = -0.08, P = 0.61$ ) or the environmental distance  
298 (partial Mantel:  $r = 0.17, P = 0.2$ ; MMRR:  $\beta_{\text{geographical}} = -0.12, P = 0.8$ ;  $\beta_{\text{environment}} = 0.26, P =$   
299  $0.6$ ).

300 The results for genetic differentiation based on putative non-neutral SNPs showed the  
301 same patterns as those found for the total set of molecular markers for the two species. For *A.*  
302 *schaueriana*, both the geographical distance and the oceanographic barrier variable presented  
303 significant values based on this dataset (Supporting Information, Tables S11 and S12). For *A.*  
304 *germinans*, the genetic distance with evidence of natural selection was significantly  
305 correlated only with the environment conditioned on geography in partial Mantel tests  
306 (Supporting Information, Tables S13). Moreover, the combination of the environment and  
307 geography was the only significant model among the MMRR analyses (Supporting  
308 Information, Tables S14). Given the significant results for the environment for *A. germinans*,  
309 we analysed the correlation between each environmental variable and the genetic distance  
310 with evidence of natural selection. Significant correlations were observed for variables that  
311 vary along the latitudinal gradient of the species, such as the maximum solar radiation (partial  
312 Mantel:  $r = 0.95, P = 0.01$ ; MMRR:  $\beta = 0.98, P = 0.01$ ), precipitation in the warmest quarter  
313 (partial Mantel:  $r = 0.87, P = 0.05$ ; MMRR:  $\beta = 0.95, P = 0.05$ ), maximum temperature of the  
314 warmest month (partial Mantel:  $r = 0.83, P = 0.03$ ; MMRR:  $\beta = 0.88, P < 0.05$ ) and  
315 variations in the annual mean temperature (partial Mantel:  $r = 0.82, P = 0.01$ ; MMRR:  $\beta =$   
316  $0.88, P < 0.05$ ) (Table 6, Supporting Information, Tables S15).

317

318 **DISCUSSION**

319 The analysis of the geographical and environmental factors shaping neutral and adaptive  
320 genetic variation in heterogeneous environments is one of the main approaches used to  
321 understand the dynamics and evolutionary potential of natural populations (Schoville *et al.*,  
322 2012; Li *et al.*, 2017). In the present study, we analysed the relative contributions of  
323 environmental and geographical distances and the presence of an oceanographic barrier to  
324 the genetic differentiation of populations of two dominant mangrove species in the  
325 Neotropics. We identified the relative importance of the main environmental variables that  
326 generate adaptation for one of these species, providing relevant information for decision-  
327 makers who will plan future efforts targeting conservation and the recovery of coastal  
328 vegetation in the face of increasing challenges resulting from anthropogenic, environmental  
329 and climate changes in this century.

330 Pairwise  $F_{ST}$  results revealed a variable degree of genetic divergence in both species,  
331 indicating the existence of substantially structured populations, particularly when samples to  
332 the north and south of the SEC are considered. These results corroborate the patterns of  
333 genetic structure reported in previous studies conducted with neutral molecular markers  
334 (Takayama *et al.*, 2008; Pil *et al.*, 2011; Mori *et al.*, 2015; Francisco *et al.*, 2018) and indicate  
335 that regardless of the characteristics of these markers with high (microsatellite; Vieira *et al.*,  
336 2016) or low (SNPs; Morin *et al.*, 2004) mutation rates, the evolutionary processes that led to  
337 this divergence must be intense or ancient.

338 The geographical distances between sampling sites contributed significantly to the  
339 genetic divergence of *A. schaueriana*, suggesting that spatial distance plays a fundamental  
340 role in the genetic divergence of populations of this species. This model appears to be  
341 common in studies of plants in general (Sexton *et al.*, 2014; Segarra-Moragues *et al.*, 2016;  
342 Cruz-Nicolás *et al.*, 2019) and mangroves in particular (Cerón-Souza *et al.*, 2010; Sandoval-  
343 Castro *et al.*, 2014; Kennedy *et al.*, 2016; Binks *et al.*, 2019; Ochoa-Zavala *et al.*, 2019).

344 Although evidence of water dispersion over long distances exists for mangrove species  
345 (Nettel & Dodd, 2007; Takayama *et al.*, 2013; Mori *et al.*, 2015; Van der Stocken *et al.*,  
346 2019b), our results indicate that the large geographical extent and major oceanic currents of  
347 the Brazilian coast physically limit the dispersal of *Avicennia* species.

348 For *A. germinans* populations, when the geographical distance was controlled by  
349 another covariate (Table 4) it did not show significant correlations for the total set of samples  
350 or for the five sampling locations north of the SEC, which were distributed in a fairly  
351 geographically continuous habitat. We hypothesized that the genetic differentiation ranging  
352 from 0.047 to 0.387 observed among sampling locations might result from an IBB effect  
353 caused by the SEC acting as a barrier to the dispersal of propagules. However, we did not  
354 find a significant correlation between genetic differentiation and the presence of the SEC.  
355 Although we did not find significant results, the explained variation and the correlation  
356 coefficient for the IBB model were higher than that of the other two models for this species  
357 (Tables 4 and 5). In addition, we also observed a slight separation in the point clouds in the  
358 scatter plots of both species between the genetic and geographical distances and between the  
359 genetic and environmental distances (Figs 4, 5), which seem to reflect the influence of the  
360 SEC bifurcation on genetic differentiation among populations. The non-significant values  
361 probably reflected insufficient sampling south of the SEC, where only a single location, GT,  
362 was used. In this context, we suggest that future efforts should address the limitations of our  
363 study to generate more conclusive IBB results for *A. germinans*.

364 In contrast, we obtained statistical evidence for the action of the SEC as a barrier to  
365 gene flow in *A. schaueriana*. Our results suggest that IBB is one of the main models for  
366 genetic differentiation among populations of this species. This model has also been shown in  
367 populations of *A. germinans* and *R. mangle* in Central America, whose patterns of genetic  
368 diversity were consistent with the patterns of ocean circulation in the east tropical Pacific

369 (Cerón-Souza *et al.*, 2015). Our results corroborate the findings reported by Mori *et al.*  
370 (2015), who suggested that the neutral genetic divergence observed for *A. schaueriana* might  
371 have been shaped by marine currents. Based on our results, the bifurcated flow of marine  
372 currents along the Atlantic coast of South America might play a key role as a driver of the  
373 genetic differentiation observed in other species of mangrove or species associated with this  
374 ecosystem, such as *R. mangle* (Pil *et al.*, 2011; Francisco *et al.*, 2018) and *H.*  
375 *pernambucensis* (Takayama *et al.*, 2008). Our findings showed statistically that the SEC is  
376 an important driver of the genetic structure of mangrove species; however, coastal and ocean  
377 currents vary temporally in strength and directionality (Van der Stocken *et al.*, 2019a). For  
378 example, the SEC splits into the BC and the NBC, which have different speeds and  
379 directions (Fig. 1; Lumpkin & Johnson, 2013). The NBC is faster than the BC, favouring the  
380 spread of propagules from south to north, as observed in previous studies (Mori *et al.*, 2015;  
381 Francisco *et al.*, 2018). Additionally, the direction of flow of coastal currents might influence  
382 the direction of gene flow among populations. Therefore, future investigations of the  
383 dynamics of these currents, not as a static barrier but including different levels of resistance  
384 to gene flow, might provide more realistic insights into their effects on the distribution of the  
385 genetic variation of species dispersed by sea currents.

386 We also identified an IBE pattern in the structure of the genetic diversity of *A.*  
387 *germinans*. For this species, this model presented significant values in relationship to neutral  
388 processes (Tables 4 and 5; Supporting Information, Tables S13 and S14), suggesting an  
389 important role of environmental heterogeneity in the reproduction and survival of migrant  
390 individuals. Many species showed this same pattern with the IBE model (Mitchell-Olds *et*  
391 *al.*, 2007; Byars *et al.*, 2009; Barker *et al.*, 2011; Vernesi *et al.*, 2012; Shafer & Wolf, 2013;  
392 Dennenmoser *et al.*, 2014; Sexton *et al.*, 2014; Manthey & Moyle, 2015; Rodríguez-Zárate  
393 *et al.*, 2018; Jiang *et al.*, 2019), indicating that environmental heterogeneity might be the



394 main factor underlying the geographical distance (Shafer & Wolf, 2013; Sexton *et al.*, 2014;  
395 Beheregaray *et al.*, 2015).

396 We also identified the key environmental factors underlying the organization of the  
397 genetic diversity of *A. germinans*. The genetic variation with evidence of selection was  
398 explained mainly by atmospheric temperature patterns, precipitation regimens and solar  
399 radiation (Table 6; Supporting Information, Table S15). These results corroborate the  
400 findings reported by Cruz *et al.* (2020), who performed a functional characterization of  
401 putative loci under selection and suggested that differential precipitation regimens play a  
402 fundamental role in genetic divergence between populations of this species. Additionally,  
403 our findings support the results reported by Bajay *et al.* (2018), who found different profiles  
404 of gene expression among populations of *R. mangle* located at contrasting latitudes of the  
405 Brazilian coast, with differentially expressed genes putatively involved in the responses to  
406 variations in temperature, solar radiation and precipitation. The results obtained for *A.*  
407 *germinans* corroborate the data from other studies reporting that precipitation and  
408 temperature variables are limiting factors regulating the distribution of coastal species  
409 (McKee *et al.*, 2012; Soares *et al.*, 2012; Osland *et al.*, 2016; Duke *et al.*, 2017; Cavanaugh  
410 *et al.*, 2018; Ximenes *et al.*, 2018). Although we acknowledge the need for complementary  
411 studies that avoid molecular spandrels (Barrett & Hoekstra, 2011), our findings, together  
412 with the results published by Cruz *et al.* (2020), provide new evidence for the role of local  
413 adaptation in the distribution of the genetic diversity of *A. germinans*.

414 Our results are particularly relevant in light of the climate changes that have been  
415 occurring in the last few decades. With them, further investigations on the responses of *A.*  
416 *germinans* to future changes in predicted increases in the average annual temperature and  
417 rainfall regimens (IPCC, 2014) can be directed. These results also have implications for  
418 conservation management and planning decisions (Friess *et al.*, 2019). With a better

419 understanding of the role of environmental variables in modelling the genetic variation of *A.*  
420 *germinans* on the South American coast, our results contribute to the definition of  
421 evolutionarily significant units for this species, thus maintaining its evolutionary potential  
422 (Fraser & Bernatchez, 2001). In addition, based on the results showing the remarkable  
423 pattern of genetic divergence of *A. schaueriana*, which is attributable, in part, to the action of  
424 the current of the marine surface studied here, we suggest the consideration of genetic banks  
425 north and south from the SEC as conservation measures for the maintenance of biodiversity.

426

## 427 **CONCLUSIONS**

428 Our results provide new evidence that the combined actions of the geographical distance,  
429 ocean currents and environmental gradient contribute to the evolution of spatial genetic  
430 divergence within two Neotropical *Avicennia* species growing on the Atlantic coast of South  
431 America. Our findings reveal that geographical distance and ocean currents can influence the  
432 pattern of gene flow in *A. schaueriana* populations, with a greater predictive ability found  
433 for IBB. We found an IBE pattern in *A. germinans* and evidence of adaptations to climate  
434 variables that have changed rapidly in recent decades. In this context, our results provide a  
435 basis for understanding the role of geographical and environmental factors in shaping genetic  
436 variation in *Avicennia* species of the South American coast. These results contribute to our  
437 understanding of the evolution of genetic diversity within this genus and provide information  
438 that might be relevant to other coastal organisms. Additionally, our findings will guide  
439 further research on the responses of these species to climate change and contribute to  
440 effective conservation plans for mangroves and other species with similar mechanisms of  
441 dispersion.

442

## 443 **ACKNOWLEDGEMENTS**

444 We thank Alessandro Alves Pereira and Prianda Rios Laborda, in addition to three  
445 anonymous reviewers, for critically reading the manuscript. We are also truly grateful for the  
446 financial support from the Coordination for the Improvement of Higher Education Personnel  
447 (CAPES Computational Biology Program), the São Paulo Research Foundation (FAPESP)  
448 and the Brazilian National Council for Scientific and Technological Development (CNPq).  
449 M.F.S. received fellowships from FAPESP (grant numbers 2018/18431-1 and 2020/00203-2)  
450 and the CAPES Computational Biology Program (grant number 88881.185134/2018-01).  
451 M.V.C. received a fellowship from FAPESP (grant number 2013/26793- 7). J.D.V. received  
452 a fellowship from CNPq (grant number 153973/2018-8). G.M.M. received fellowships from  
453 FAPESP (grant numbers 2013/08086-1 and 2014/22821-9) and a research award from CNPq  
454 (grant number 448286/2014-9). A.P.S. received fellowships from the CAPES Computational  
455 Biology Program (grant number 88882.160095/2013-01) and a research fellowship from  
456 CNPq (grant number 312777/2018-3). The authors have no competing interests to declare.

457

#### 458 **CONFLICT OF INTEREST**

459 The authors have no competing interests to declare.

460 **REFERENCES**

- 461 Antao T, Lopes A, Lopes RJ, Beja-Pereira A, Luikart G. 2008. LOSITAN: a workbench to  
462 detect molecular adaptation based on a  $F_{st}$ -outlier method. *BMC Bioinformatics* 9:  
463 323.
- 464 Bajay SK, Cruz MV, da Silva CC, Murad NF, Brandão MM, de Souza AP. 2018.  
465 Extremophiles as a model of a natural ecosystem: transcriptional coordination of  
466 genes reveals distinct selective responses of plants under climate change scenarios.  
467 *Frontiers in Plant Science* 9: 1376.
- 468 Barker JSF, Frydenberg J, Sarup P, Loeschcke V. 2011. Altitudinal and seasonal variation in  
469 microsatellite allele frequencies of *Drosophila buzzatii*. *Journal of Evolutionary*  
470 *Biology* 24: 430-439.
- 471 Barrett RD, Hoekstra HE. 2011. Molecular spandrels: tests of adaptation at the genetic level.  
472 *Nature Reviews Genetics* 12: 767-780.
- 473 Barton NH. 1979. Gene flow past a cline. *Heredity* 43: 333-339.
- 474 Beheregaray LB, Cooke GM, Chao NL, Landguth EL. 2015. Ecological speciation in the  
475 tropics: insights from comparative genetic studies in Amazonia. *Frontiers in Genetics*  
476 5: 477.
- 477 Binks RM, Byrne M, McMahon K, Pitt G, Murray K, Evans RD. 2019. Habitat  
478 discontinuities form strong barriers to gene flow among mangrove populations,  
479 despite the capacity for long-distance dispersal. *Diversity and Distributions* 25: 298-  
480 309.
- 481 Bradburd GS, Ralph PL, Coop GM. 2013. Disentangling the effects of geographic and  
482 ecological isolation on genetic differentiation. *Evolution* 67: 3258-3273.
- 483 Byars SG, Parsons Y, Hoffmann AA. 2009. Effect of altitude on the genetic structure of an  
484 Alpine grass, *Poa hiemata*. *Annals of Botany* 103: 885-899.

- 485 Cavanaugh KC, Osland MJ, Bardou R, Hinojosa-Arango G, López-Vivas JM, Parker JD,  
486       Rovai AS. 2018. Sensitivity of mangrove range limits to climate variability. *Global*  
487       *Ecology and Biogeography* 27: 925-935.
- 488 Cerón-Souza I, Rivera-Ocasio E, Medina E, Jiménez JA, McMillan WO, Bermingham E.  
489       2010. Hybridization and introgression in New World red mangroves, *Rhizophora*  
490       (Rhizophoraceae). *American Journal of Botany* 97: 945-957.
- 491 Cerón-Souza I, Gonzalez EG, Schwarzbach AE, Salas-Leiva DE, Rivera-Ocasio E, Toro-  
492       Perea N, Bermingham E, McMillan WO. 2015. Contrasting demographic history and  
493       gene flow patterns of two mangrove species on either side of the Central American  
494       Isthmus. *Ecology and Evolution* 5: 3486–3499
- 495 Chapman AD. 2005. *Principles and methods of data cleaning – primary species and species*  
496       *occurrence data, version 1.0*. Copenhagen: Report for the Global Biodiversity  
497       Information Facility. Available online at <http://www.gbif.org/document/80528>.
- 498 Cruz MV, Mori GM, Oh DH, Dassanayake M, Zucchi MI, Oliveira RS, Souza AP. 2020.  
499       Molecular responses to freshwater limitation in the mangrove tree *Avicennia*  
500       *germinans* (Acanthaceae). *Molecular Ecology* 29: 344-362.
- 501 Cruz MV, Mori GM, Signori-Müller C, da Silva CC, Oh D-H, Dassanayake M, Zucchi MI,  
502       Oliveira RS, de Souza AP. 2019. Local adaptation of a dominant coastal tree to  
503       freshwater availability and solar radiation suggested by genomic and ecophysiological  
504       approaches. *Scientific Reports* 9: 27.
- 505 Cruz-Nicolás J, Giles-Pérez G, González-Linares E, Múgica-Gallart J, Lira-Noriega A,  
506       Gernandt DS, Eguiarte LE, Jaramillo-Correa JP. 2019. Contrasting evolutionary  
507       processes drive morphological and genetic differentiation in a subtropical fir (*Abies*,  
508       Pinaceae) species complex. *Botanical Journal of the Linnean Society* 192: 401-420.  
509

- 510 Cushman SA, McKelvey KS, Hayden J & Schwartz MK. 2006. Gene flow in complex  
511 landscapes: Testing multiple hypotheses with causal modeling. *American Naturalist*  
512 168: 486–499.
- 513 Danecek P, Auton A, Abecasis G, Albers CA, Banks E, DePristo MA, Handsaker RE, Lunter  
514 G, Marth GT, Sherry ST, McVean G, Durbin R. 2011. The variant call format and  
515 VCF tools. *Bioinformatics* 27: 2156-2158.
- 516 Dennenmoser S, Rogers SM, Vamosi SM. 2014. Genetic population structure in prickly  
517 sculpin (*Cottus asper*) reflects isolation-by-environment between two life-history  
518 ecotypes. *Biological Journal of the Linnean Society* 113: 943-957.
- 519 Duke NC. 1991. A systematic revision of the mangrove genus *Avicennia* (Avicenniaceae) in  
520 Australasia. *Australian Systematic Botany* 4: 299.
- 521 Duke NC, Kovacs JM, Griffiths AD, Preece L, Hill DJE, van Oosterzee P, Mackenzie J,  
522 Morning HS, Burrows D. 2017. Large-scale dieback of mangroves in Australia.  
523 *Marine and Freshwater Research* 68: 1816.
- 524 Fick SE, Hijmans RJ. 2017. WorldClim 2: new 1-km spatial resolution climate surfaces for  
525 global land areas. *International Journal of Climatology* 37: 4302-4315.
- 526 Francisco PM, Mori GM, Alves FM, Tambarussi EV, de Souza AP. 2018. Population genetic  
527 structure, introgression, and hybridization in the genus *Rhizophora* along the Brazilian  
528 coast. *Ecology and Evolution* 8: 3491-3504.
- 529 Fraser DJ, Bernatchez L. 2001. Adaptive evolutionary conservation: towards a unified  
530 concept for defining conservation units. *Molecular Ecology* 10: 2741-2752.
- 531 Frichot E, François O. 2015. LEA: an R package for landscape and ecological association  
532 studies. *Methods in Ecology and Evolution* 6: 925-929.

- 533 Friess D, Rogers K, Lovelock C, Krauss K, Hamilton S, Lee S, Lucas R, Primavera J,  
534 Rajkaran A, Shi S. 2019. The state of the world's mangrove forests: past, present, and  
535 future. *Annual Review of Environment and Resources* 44: 1-27.
- 536 Giri C, Ochieng E, Tieszen LL, Zhu Z, Singh A, Loveland T, Masek J, Duke N. 2011. Status  
537 and distribution of mangrove forests of the world using earth observation satellite  
538 data. *Global Ecology and Biogeography* 20: 154-159.
- 539 Goslee SC & Urban DL. 2007. The ecodist package for dissimilarity-based analysis of  
540 ecological data. *Journal of Statistical Software* 22: 1–19.
- 541 Goudet J. 2005. hierfstat, a package for r to compute and test hierarchical F-statistics.  
542 *Molecular Ecology Notes* 5: 184-186.
- 543 Hamilton S.E. 2020. Botany of Mangroves. *In: Mangroves and Aquaculture. Coastal*  
544 *Research Library*, vol 33. Springer, Cham. [https://doi.org/10.1007/978-3-030-22240-](https://doi.org/10.1007/978-3-030-22240-6_1)  
545 [6\\_1](https://doi.org/10.1007/978-3-030-22240-6_1).
- 546 Hijmans RJ. 2017. *raster: geographic data analysis and modelling. R package version 2.6–7.*  
547 Available at: <https://cran.r-project.org/package=raster>.
- 548 Holderegger R, Buehler D, Gugerli F, Manel S. 2010. Landscape genetics of plants. *Trends in*  
549 *Plant Science* 15: 675-683.
- 550 IPCC, 2014: Climate Change 2014: Synthesis Report. *Contribution of Working Groups I, II*  
551 *and III to the Fifth Assessment Report of the Intergovernmental Panel on Climate*  
552 *Change* [Core Writing Team, R.K. Pachauri and L.A. Meyer (eds.)]. IPCC, Geneva,  
553 Switzerland, 151 pp.
- 554 Jasechko S, Sharp ZD, Gibson JJ, Birks SJ, Yi Y, Fawcett PJ. 2013. Terrestrial water fluxes  
555 dominated by transpiration. *Nature* 496: 347-350.
- 556 Jiang S, Luo MX, Gao RH, Zhang W, Yang YZ, Li YJ, Liao PC. 2019. Isolation-by-  
557 environment as a driver of genetic differentiation among populations of the only

- 558 broad-leaved evergreen shrub *Ammopiptanthus mongolicus* in Asian temperate  
559 deserts. *Scientific Reports* 9: 12008.
- 560 Joost S, Bonin A, Bruford MW, Després L, Conord C, Erhardt G, Taberlet P. 2007. A Spatial  
561 Analysis Method (SAM) to detect candidate loci for selection: towards a landscape  
562 genomics approach to adaptation. *Molecular Ecology* 16: 3955-3969.
- 563 Kennedy JP, Pil MW, Proffitt CE, Boeger WA, Stanford AM, Devlin DJ. 2016. Postglacial  
564 expansion pathways of red mangrove, *Rhizophora mangle*, in the Caribbean Basin  
565 and Florida. *American Journal of Botany* 103: 260-276.
- 566 Klein T, Langner J, Frankenberg B, Svensson J, Broman B, Bennet C, Langborg T. 2013.  
567 ECDS - a Swedish research infrastructure for the open sharing of environment and  
568 climate data. *Data Science Journal* 12: 1-9.
- 569 Kovach RP, Gharrett AJ, Tallmon DA. 2012. Genetic change for earlier migration timing in a  
570 pink salmon population. *Proceedings of the Royal Society B: Biological Sciences* 279:  
571 3870-3878.
- 572 Lee CR, Mitchell-Olds T. 2011. Quantifying effects of environmental and geographical  
573 factors on patterns of genetic differentiation. *Molecular Ecology* 20: 4631-4642.
- 574 Legendre P. 1993. Spatial Autocorrelation: Trouble or New Paradigm? *Ecology* 74:1659–  
575 1673.
- 576 Legendre, P., and L. Legendre. 2012. Numerical ecology, 3rd edn. Elsevier, Amsterdam.
- 577 Leroy B, Meynard CN, Bellard C, Courchamp F. 2016. virtualspecies, an R package to  
578 generate virtual species distributions. *Ecography* 39: 599-607.
- 579 Li X, Duke NC, Yang Y, Huang L, Zhu Y, Zhang Z, Zhou R, Zhong C, Huang Y, Shi S.  
580 2016. Re-evaluation of phylogenetic relationships among species of the Mangrove  
581 Genus *Avicennia* from Indo-West Pacific based on multilocus analyses. *PLoS One* 11:  
582 e0164453.



- 583 Li Y, Zhang XX, Mao RL, Yang J, Miao CY, Li Z, Qiu YX. 2017. Ten years of landscape  
584 genomics: challenges and opportunities. *Frontiers in Plant Science* 8: 2136.
- 585 Lowry DB. 2010. Landscape evolutionary genomics. *Biology Letters* 6: 502-504.
- 586 Lumpkin R, Johnson GC. 2013. Global ocean surface velocities from drifters: mean,  
587 variance, El Niño-Southern Oscillation response, and seasonal cycle. *Journal of*  
588 *Geophysical Research: Oceans* 118: 2992-3006.
- 589 Luu K, Bazin E, Blum MGB. 2017. pcadapt: anRpackage to perform genome scans for  
590 selection based on principal component analysis. *Molecular Ecology Resources* 17:  
591 67-77.
- 592 Mannion PD, Upchurch P, Benson RBJ, Goswami A. 2014. The latitudinal biodiversity  
593 gradient through deep time. *Trends in Ecology & Evolution* 29: 42-50.
- 594 Manthey JD, Moyle RG. 2015. Isolation by environment in White-breasted Nuthatches (*Sitta*  
595 *carolinensis*) of the Madrean Archipelago sky islands: a landscape genomics  
596 approach. *Molecular Ecology* 24: 3628-3638.
- 597 McKee K, Rogers K, Saintilan N. 2012. Response of salt marsh and Mangrove wetlands to  
598 changes in atmospheric CO<sub>2</sub>, climate, and sea level. In: Middleton BA, ed. *Global*  
599 *change and the function and distribution of wetlands*. Dordrecht, Netherlands:  
600 Springer, 63-96.
- 601 Middleton BA. 2012. *Global change and the function and distribution of wetlands*.  
602 Dordrecht, Netherlands: Springer.
- 603 Mitchell-Olds T, Willis JH, Goldstein DB. 2007. Which evolutionary processes influence  
604 natural genetic variation for phenotypic traits? *Nature Reviews Genetics* 8: 845-856.
- 605 Mori GM, Zucchi MI, Souza AP. 2015. Multiple-geographic-scale genetic structure of two  
606 Mangrove tree species: the roles of mating system, hybridization, limited dispersal  
607 and extrinsic factors. *PLoS One* 10: e0118710.

- 608 Morin PA, Luikart G, Wayne RK, The SNP Workshop Group. 2004. SNPs in ecology,  
609 evolution and conservation. *Trends in Ecology & Evolution* 19: 208-216.
- 610 Morrisey DJ, Swales A, Dittmann S, Morrison MA, Lovelock CE, Beard CM. 2010. The  
611 ecology and management of temperate mangroves. In: Gibson RN, Atkinson RJA,  
612 Gordon JDM, eds. *Oceanography and marine biology: an annual review*. Boca  
613 Raton, FL: Chapman and Hall/CRC, 43-160.
- 614 Muñoz NJ, Farrell AP, Heath JW, Neff BD. 2015. Adaptive potential of a Pacific salmon  
615 challenged by climate change. *Nature Climate Change* 5: 163-166.
- 616 Murray KD, Janes JK, Jones A, Bothwell HM, Andrew RL, Borevitz JO. 2019. Landscape  
617 drivers of genomic diversity and divergence in woodland Eucalyptus. *Molecular  
618 Ecology* 28: 5232-5247.
- 619 Nettel A, Dodd RS. 2007. Drifting propagules and receding swamps: genetic footprints of  
620 mangrove recolonization and dispersal along tropical coasts. *Evolution* 61: 958-971.
- 621 Ochoa-Zavala M, Jaramillo-Correa JP, Piñero D, Nettel-Hernanz A, Núñez-Farfán J. 2019.  
622 Contrasting colonization patterns of black mangrove (*Avicennia germinans* (L.) L.)  
623 gene pools along the Mexican coasts. *Journal of Biogeography* 46: 884-898.
- 624 Osland MJ, Enwright NM, Day RH, Gabler CA, Stagg CL, Grace JB. 2016. Beyond just sea-  
625 level rise: considering macroclimatic drivers within coastal wetland vulnerability  
626 assessments to climate change. *Global Change Biology* 22: 1-11.
- 627 Osland MJ, Feher LC, Griffith KT, Cavanaugh KC, Enwright NM, Day RH, Stagg CL,  
628 Krauss KW, Howard RJ, Grace JB, Rogers K. 2017. Climatic controls on the global  
629 distribution, abundance, and species richness of mangrove forests. *Ecological  
630 Monographs* 87: 341-359.
- 631 Pil MW, Boeger MRT, Muschner VC, Pie MR, Ostrensky A, Boeger WA. 2011. Postglacial  
632 north-south expansion of populations of *Rhizophora mangle* (Rhizophoraceae) along

- 633 the Brazilian coast revealed by microsatellite analysis. *American Journal of Botany*  
634 98: 1031-1039.
- 635 R Core Team (2019). *R: A language and environment for statistical computing*. R Foundation  
636 for Statistical Computing, Vienna, Austria. URL <https://www.R-project.org/>.
- 637 Robertson JM, Duryea MC & Zamudio KR. 2009. Discordant patterns of evolutionary  
638 differentiation in two Neotropical treefrogs. *Molecular Ecology* 18: 1375–1395.
- 639 Rodríguez-Zárate CJ, Sandoval-Castillo J, van Sebille E, Keane RG, Rocha-Olivares A,  
640 Urteaga J, Beheregaray LB. 2018. Isolation by environment in the highly mobile olive  
641 ridley turtle (*Lepidochelys olivacea*) in the eastern Pacific. *Proceedings of the Royal*  
642 *Society B: Biological Sciences* 285: 20180264.
- 643 Saintilan N, Khan NS, Ashe E, Kelleway JJ, Rogers K, Woodroffe CD, Horton BP. 2020.  
644 Thresholds of mangrove survival under rapid sea level rise. *Science* 368: 1118.
- 645 Sandoval-Castro E, Dodd RS, Riosmena-Rodríguez R, Enríquez-Paredes LM, Tovilla-  
646 Hernández C, López-Vivas JM, Aguilar-May B, Muñiz-Salazar R. 2014. Post-glacial  
647 expansion and population genetic divergence of Mangrove Species *Avicennia*  
648 *germinans* (L.) stearn and *Rhizophora mangle* L. along the Mexican Coast. *PLoS One*  
649 9: e93358.
- 650 Savolainen O, Pyhäjärvi T, Knürr T. 2007. Gene flow and local adaptation in trees. *Annual*  
651 *Review of Ecology, Evolution, and Systematics* 38: 595-619.
- 652 Sbrocco EJ, Barber PH. 2013. MARSPEC: ocean climate layers for marine spatial ecology.  
653 *Ecology* 94: 979.
- 654 Schaeffer-Novelli Y, Cintrón-Molero G, Adaime RR, de Camargo TM, Cintron-Molero G, de  
655 Camargo TM. 1990. Variability of Mangrove ecosystems along the Brazilian Coast.  
656 *Estuaries* 13: 204-218.

- 657 Schoville SD, Bonin A, François O, Lobreaux S, Melodelima C, Manel S. 2012. Adaptive  
658 genetic variation on the landscape: methods and cases. *Annual Review of Ecology,*  
659 *Evolution, and Systematics* 43: 23-43.
- 660 Segarra-Moragues JG, Carrión Marco Y, Castellanos MC, Molina MJ, García-Fayos P. 2016.  
661 Ecological and historical determinants of population genetic structure and diversity in  
662 the Mediterranean shrub *Rosmarinus officinalis* (Lamiaceae). *Botanical Journal of the*  
663 *Linnean Society* 180: 50-63.
- 664 Sexton JP, Hangartner SB, Hoffmann AA. 2014. Genetic isolation by environment or  
665 distance: which pattern of gene flow is most common? *Evolution* 68: 1-15.
- 666 Shafer ABA, Wolf JBW. 2013. Widespread evidence for incipient ecological speciation: a  
667 meta-analysis of isolation-by-ecology. *Ecology Letters* 16: 940-950.
- 668 Smouse PE, Long JC & Sokal RR. 2012. Multiple regression and correlation extensions of  
669 the Mantel test of matrix correspondence. *Systematic Zoology*. 35: 627–632.
- 670 Soares MLG, Estrada GCD, Fernandez V, Tognella MMP. 2012. Southern limit of the  
671 Western South Atlantic Mangroves: assessment of the potential effects of global  
672 warming from a biogeographical perspective. *Estuarine, Coastal and Shelf Science*  
673 101: 44-53.
- 674 Sork VL. 2016. Gene flow and natural selection shape spatial patterns of genes in tree  
675 populations: implications for evolutionary processes and applications. *Evolutionary*  
676 *Applications* 9: 291-310.
- 677 Spalding M, Blasco F, Field CD. 1997. *World mangrove atlas*. Japan, Okinawa: The  
678 International Society for Mangroves Ecosystems.
- 679 Storfer A, Murphy MA, Spear SF, Holderegger R, Waits LP. 2010. Landscape genetics:  
680 where are we now? *Molecular Ecology* 19: 3496-3514.

- 681 Storfer A, Patton A, Fraik AK. 2018. Navigating the interface between landscape genetics  
682 and landscape genomics. *Frontiers in Genetics* 9: 68.
- 683 Takayama K, Tamura M, Tateishi Y, Webb EL, Kajita T. 2013. Strong genetic structure over  
684 the American continents and transoceanic dispersal in the mangrove genus  
685 *Rhizophora* (Rhizophoraceae) revealed by broad-scale nuclear and chloroplast DNA  
686 analysis. *American Journal of Botany* 100: 1191-1201.
- 687 Takayama K, Tateishi Y, Murata JIN, Kajita T. 2008. Gene flow and population subdivision  
688 in a pantropical plant with sea-drifted seeds *Hibiscus tiliaceus* and its allied species:  
689 evidence from microsatellite analyses. *Molecular Ecology* 17: 2730-2742.
- 690 Tomlinson. 1986. *The Botany of Mangroves*. New York: Cambridge University Press.
- 691 Van der Stocken T, Carroll D, Menemenlis D, Simard M, Koedam N. 2019a. Global-scale  
692 dispersal and connectivity in mangroves. *Proceedings of the National Academy of*  
693 *Sciences* 116: 915-922.
- 694 Van der Stocken T, Wee AKS, De Ryck DJR, Vanschoenwinkel B, Friess DA, Dahdouh-  
695 Guebas F, Simard M, Koedam N, Webb EL. 2019b. A general framework for  
696 propagule dispersal in mangroves. *Biological Reviews* 94: 1547-1575.
- 697 Vernesi C, Rocchini D, Pecchioli E, Neteler M, Vendramin GG, Paffetti D. 2012. A  
698 landscape genetics approach reveals ecological-based differentiation in populations of  
699 holm oak (*Quercus ilex* L.) at the northern limit of its range. *Biological Journal of the*  
700 *Linnean Society* 107: 458-467.
- 701 Vieira MLC, Santini L, Diniz AL, Munhoz CF. 2016. Microsatellite markers: what they mean  
702 and why they are so useful. *Genetics and Molecular Biology* 39: 312-328.
- 703 Vincent B, Dionne M, Kent MP, Lien S, Bernatchez L. 2013. Landscape genomics in *Atlantic*  
704 *salmon* (*Salmo Salar*): searching for gene-environment interactions driving local  
705 adaptation. *Evolution* 67: 3469-3487.

- 706 Wang IJ. 2013. Examining the full effects of landscape heterogeneity on spatial genetic  
707 variation: a multiple matrix regression approach for quantifying geographic and  
708 ecological isolation. *Evolution* 67: 3403-3411.
- 709 Wang IJ, Bradburd GS. 2014. Isolation by environment. *Molecular Ecology* 23: 5649-5662.
- 710 Wang IJ, Glor RE, Losos JB. 2013. Quantifying the roles of ecology and geography in spatial  
711 genetic divergence. *Ecology Letters* 16: 175-182.
- 712 Wee AKS, Mori GM, Lira CF, Núñez-Farfán J, Takayama K, Faulks L, Shi S, Tsuda Y,  
713 Suyama Y, Yamamoto T, Iwasaki T, Nagano Y, Wang Z, Watanabe S, Kajita T.  
714 2019. The integration and application of genomic information in Mangrove  
715 conservation. *Conservation Biology* 33: 206-209.
- 716 Wright S. 1943. Isolation by distance. *Genetics* 28: 114-138.
- 717 Wright S. 1949. The genetical structure of populations. *Annals of Eugenics* 15: 323-354.
- 718 Wu Z, Yu D, Li X & Xu X. 2016. Influence of geography and environment on patterns of  
719 genetic differentiation in a widespread submerged macrophyte, Eurasian watermilfoil  
720 (*Myriophyllum spicatum* L., Haloragaceae). *Ecology and Evolution* 6: 460–468.
- 721 Ximenes A, Ponsoni L, Lira C, Koedam N, Dahdouh-Guebas F. 2018. Does sea surface  
722 temperature contribute to determining range limits and expansion of Mangroves in  
723 Eastern South America (Brazil)? *Remote Sensing* 10: 1787.
- 724

## 725 SUPPORTING INFORMATION

726 Additional Supporting Information may be found in the online version of this article at the  
727 publisher's web-site:

728 **Figure S1.** Groups (red boxes) of correlated environmental variables retrieved from the  
729 public data platforms WorldClim (Fick & Hijmans, 2017), Marspec (Sbrocco & Barber,  
730 2013), and ECDS (Klein *et al.*, 2013). The cutoff value for Pearson's correlation coefficient  
731 was set to 0.8. \*Environmental variables retained for subsequent analysis.

732 **Table S1.** Environmental data matrix for the ten sampling points of *Avicennia schaueriana*.  
733 Sample codes are denoted as in Table 1.

734 **Table S2.** Environmental data matrix for the six sampling points of *Avicennia germinans*.  
735 Sample codes are denoted as in Table 1.

736 **Table S3.** Interpopulation genetic differentiation based on the set of markers with evidence of  
737 natural selection estimated by  $F_{ST}$  (Wright) pairs for the *Avicennia schaueriana* collection.  
738 Sample codes are denoted as in Table 1.

739 **Table S4.** Interpopulation genetic differentiation based on the set of markers with evidence of  
740 natural selection estimated by  $F_{ST}$  (Wright) pairs for the *Avicennia germinans* collection.  
741 Sample codes are denoted as in Table 1.

742 **Table S5.** Pairwise geographical distances for *Avicennia schaueriana*. Sample codes are  
743 denoted as in Table 1.

744 **Table S6.** Pairwise geographical distances for *Avicennia germinans*. Sample codes are  
745 denoted as in Table 1.

746 **Table S7.** Pairwise environmental distances based on each environmental variable for  
747 *Avicennia schaueriana*. Sample codes are denoted as in Table 1.

748 **Table S8.** Pairwise environmental distances based on each environmental variable for  
749 *Avicennia germinans*. Sample codes are denoted as in Table 1.

750 **Table S9.** Pairwise environmental distances for *Avicennia schaueriana*. Sample codes are  
751 denoted as in Table 1.

752 **Table S10.** Pairwise environmental distances for *Avicennia germinans*. Sample codes are  
753 denoted as in Table 1.

754 **Table S11.** Results of the simple and partial Mantel tests between genetic distance based on  
755 the set of non-neutral molecular markers and the geographical distance, environmental  
756 distance and oceanographic barrier matrix for *Avicennia schaueriana* populations.

757 **Table S12.** Regression coefficient ( $\beta$ ), coefficient of determination ( $R^2$ ) and significance ( $P$ )  
758 of the multiple matrix regression with randomization (MMRR) analysis in the association  
759 between genetic distance based on the set of non-neutral molecular markers and combinations  
760 between geographical distance, environmental distance and the oceanographic barrier matrix  
761 of *Avicennia schaueriana* populations.

762 **Table S13.** Results of the simple and partial Mantel tests between genetic distance based on  
763 the set of non-neutral molecular markers and the geographical distance, environmental  
764 distance and oceanographic barrier matrix for *Avicennia germinans* populations.

765 **Table S14.** Regression coefficient ( $\beta$ ), coefficient of determination ( $R^2$ ) and significance ( $P$ )  
766 of the multiple matrix regression with randomization (MMRR) analysis in the association  
767 between genetic distance based on the set of non-neutral molecular markers and combinations  
768 of geographical distance, environmental distance and the oceanographic barrier matrix of  
769 *Avicennia germinans* populations.

770 **Table S15.** Results of the partial Mantel test and multiple matrix regression with  
771 randomization (MMRR) analysis for the associations between genetic distance based on the  
772 set of non-neutral molecular markers and the environmental variables for *Avicennia*  
773 *germinans*.

774



775 **SHARED DATA**

776 *Avicennia germinans* SNP genotype data are available from the Dryad Digital Repository

777 (Cruz *et al.*, 2019). *A. schaueriana* SNP genotype data are available from the article:

778 doi:10.1038/s41598-019-56469-w (supplementary datasets 1 and 2).

779

780 **TABLES**

781 **Table 1.** Sites at which the samples of *Avicennia schaueriana* and *Avicennia germinans* were  
 782 collected along the South American coast, from north to south.

| <i>A. schaueriana</i> | <i>A. germinans</i> | Locality (City/State)         | Latitude | Longitude |
|-----------------------|---------------------|-------------------------------|----------|-----------|
|                       | GM                  | Soure, Pará                   | -0.723   | -48.490   |
|                       | GB                  | Bragança, Pará                | -0.904   | -46.687   |
| SB                    |                     | Bragança, Pará                | -0.820   | -46.615   |
| SA                    | GA                  | Alcântara, Maranhão           | -2.410   | -44.406   |
|                       | GN                  | Parnaíba, Piauí               | -2.778   | -41.822   |
| SR                    | GR                  | Paracuru, Ceará               | -3.413   | -39.056   |
|                       | GT                  | Tamandaré, Pernambuco         | -8.526   | -35.013   |
| SV                    |                     | Vera Cruz, Bahia              | -12.983  | -38.684   |
| SG                    |                     | Guapimirim, Rio de Janeiro    | -22.701  | -43.007   |
| SU                    |                     | Ubatuba, São Paulo            | -23.489  | -45.164   |
| SC                    |                     | Cananéia, São Paulo           | -25.020  | -47.918   |
| SP                    |                     | Pontal do Paraná, Paraná      | -25.575  | -48.352   |
| SF                    |                     | Florianópolis, Santa Catarina | -27.576  | -48.518   |
| SL                    |                     | Laguna, Santa Catarina        | -28.445  | -48.840   |

783 Sample populations of *A. schaueriana* and *A. germinans* are indicated by two capital letters, as shown  
 784 in Figure 1.

785

786 **Table 2.** Results of the simple and partial Mantel tests between genetic distance based on the  
 787 total set of single nucleotide polymorphism molecular markers and the geographical distance,  
 788 environmental distance and oceanographic barrier matrix for *Avicennia schaueriana*  
 789 populations.

| Landscape feature     | Controlled            | <i>r</i> | <i>P</i>       |
|-----------------------|-----------------------|----------|----------------|
| Geographical distance |                       | 0.9      | < <b>0.001</b> |
| Environment distance  |                       | 0.73     | < <b>0.001</b> |
| Oceanographic barrier |                       | 0.96     | < <b>0.01</b>  |
| Geographical distance | Environment distance  | 0.83     | < <b>0.001</b> |
| Geographical distance | Oceanographic barrier | 0.45     | < <b>0.01</b>  |
| Environment distance  | Geographical distance | - 0.47   | 0.9            |
| Environment distance  | Oceanographic barrier | 0.23     | 0.09           |
| Oceanographic barrier | Geographical distance | 0.82     | < <b>0.01</b>  |
| Oceanographic barrier | Environment distance  | 0.92     | < <b>0.01</b>  |

790 Significant values are presented in bold.

791 **Table 3.** Regression coefficient ( $\beta$ ), coefficient of determination ( $R^2$ ) and significance ( $P$ ) of  
 792 the multiple matrix regression with randomization analysis in the association between genetic  
 793 distance based on the total set of single nucleotide polymorphism molecular markers and  
 794 combinations of geographical distance, environmental distance and the oceanographic barrier  
 795 matrix of *Avicennia schaueriana* populations.

| Combination of landscape features                      | $\beta_{\text{geographical}}$ | $P$    | $\beta_{\text{environment}}$ | $P$  | $\beta_{\text{ocean barrier}}$ | $P$    | $R^2$ | $P$    |
|--------------------------------------------------------|-------------------------------|--------|------------------------------|------|--------------------------------|--------|-------|--------|
| $D_{\text{geo}} + D_{\text{env}}$                      | 0.13                          | 0.001  | -0.48                        | 0.01 | -                              | -      | 0.86  | < 0.05 |
| $D_{\text{geo}} + M_{\text{barrier}}$                  | 0.25                          | < 0.01 | -                            | -    | 0.73                           | < 0.01 | 0.94  | < 0.01 |
| $D_{\text{env}} + M_{\text{barrier}}$                  | -                             | -      | 0.09                         | 0.1  | 0.89                           | < 0.01 | 0.93  | < 0.01 |
| $D_{\text{geo}} + D_{\text{env}} + M_{\text{barrier}}$ | 0.48                          | < 0.01 | -0.18                        | 0.14 | 0.67                           | < 0.01 | 0.94  | 0.001  |

796 Abbreviations:  $D_{\text{geo}}$ : Geographical distance;  $D_{\text{env}}$ : Environmental distance;  $M_{\text{barrier}}$ : Oceanographic  
 797 barrier matrix.

798

799 **Table 4.** Results of the simple and partial Mantel tests between genetic distance based on the  
 800 total set of single nucleotide polymorphism molecular markers and the geographical distance,  
 801 environmental distance and oceanographic barrier matrix for *Avicennia germinans*  
 802 populations.

| Landscape feature     | Controlled            | $r$  | $P$         |
|-----------------------|-----------------------|------|-------------|
| Geographical distance |                       | 0.78 | <b>0.04</b> |
| Environment distance  |                       | 0.81 | <b>0.01</b> |
| Oceanographic barrier |                       | 0.95 | 0.16        |
| Geographical distance | Environment distance  | 0.26 | 0.14        |
| Geographical distance | Oceanographic barrier | 0.14 | 0.25        |
| Environment distance  | Geographical distance | 0.45 | <b>0.01</b> |
| Environment distance  | Oceanographic barrier | 0.39 | 0.17        |
| Oceanographic barrier | Geographical distance | 0.88 | 0.12        |
| Oceanographic barrier | Environment distance  | 0.88 | 0.15        |

803 Significant values are presented in bold.

804

805 **Table 5.** Regression coefficient ( $\beta$ ), coefficient of determination ( $R^2$ ) and significance ( $P$ ) of  
 806 the multiple matrix regression with randomization analysis in the association between genetic  
 807 distance based on the total set of single nucleotide polymorphism molecular markers and  
 808 combinations of geographical distance, environmental distance and the oceanographic barrier  
 809 matrix of *Avicennia germinans* populations.

| Combination of landscape feature                       | $\beta_{\text{geographical}}$ | $P$  | $\beta_{\text{environment}}$ | $P$    | $\beta_{\text{ocean barrier}}$ | $P$  | $R^2$ | $P$    |
|--------------------------------------------------------|-------------------------------|------|------------------------------|--------|--------------------------------|------|-------|--------|
| $D_{\text{geo}} + D_{\text{env}}$                      | 0.28                          | 0.34 | 0.55                         | < 0.05 | -                              | -    | 0.69  | < 0.05 |
| $D_{\text{geo}} + M_{\text{barrier}}$                  | 0.06                          | 0.6  | -                            | -      | 0.90                           | 0.1  | 0.94  | 0.1    |
| $D_{\text{env}} + M_{\text{barrier}}$                  | -                             | -    | 0.17                         | 0.3    | 0.81                           | 0.16 | 0.93  | < 0.01 |
| $D_{\text{geo}} + D_{\text{env}} + M_{\text{barrier}}$ | -0.07                         | 0.5  | 0.22                         | 0.2    | 0.84                           | 0.1  | 0.94  | 0.06   |

810 Abbreviations:  $D_{\text{geo}}$ : Geographical distance;  $D_{\text{env}}$ : Environmental distance;  $M_{\text{barrier}}$ : Oceanographic  
 811 barrier matrix.

812

813 **Table 6.** Summary results of the partial Mantel test and multiple matrix regression with  
 814 randomization (MMRR) analysis for on the associations between genetic distances based on  
 815 the set of non-neutral molecular markers and the most important environmental variables for  
 816 *Avicennia germinans*.

| Environmental variables                  | partial Mantel test |            | MMRR    |            |
|------------------------------------------|---------------------|------------|---------|------------|
|                                          | $r$                 | $P$ -value | $\beta$ | $P$ -value |
| Maximum solar radiation                  | 0.95                | 0.01       | 0.98    | 0.01       |
| Precipitation in the warmest quarter     | 0.87                | 0.05       | 0.95    | 0.05       |
| Maximum temperature of the warmest month | 0.83                | < 0.05     | 0.88    | < 0.05     |
| Annual mean temperature                  | 0.82                | 0.01       | 0.88    | < 0.05     |

817 Partial Mantel tests were conditioned on geographical distance.

818

819 **FIGURE LEGENDS**

820 **Figure 1.** Geographical distribution and characterization of the *Avicennia schaueriana* and  
821 *Avicennia germinans* sampling sites along the South American coast. The blue area  
822 represents the geographical distribution of *A. schaueriana* and its sympatric region with *A.*  
823 *germinans* (blue and yellow). Black circles and triangles represent the sampling sites of the  
824 plant material used for the genotyping of genomic DNA from *A. schaueriana* and *A.*  
825 *germinans*, respectively (Cruz *et al.*, 2019, 2020). Sampling locations, which are indicated by  
826 two letters, are displayed as described in Table 1. Arrows represent the direction of the main  
827 ocean currents acting on the Brazilian coast. Arrow widths illustrate the mean current speed  
828 (Lumpkin & Johnson, 2013).

829 **Figure 2.** Heatmaps describing interpopulation genetic differentiation based on the total set  
830 of single nucleotide polymorphism molecular markers estimated by pairwise *F*<sub>ST</sub> (Wright) for  
831 *Avicennia schaueriana* (filled circles; A) and *Avicennia germinans* (filled triangles; B)  
832 collection sites. Sample codes are denoted as in Table 1.

833 **Figure 3.** Locations of populations of *Avicennia schaueriana* (A) and *Avicennia germinans*  
834 (B) in a bidimensional projection of the principal components analysis used to calculate the  
835 environmental distance. The acronyms for sampling locations, which are indicated by two  
836 letters, are the same as those listed in Table 1. The color gradient represents the contribution  
837 of each environmental variable to principal component (PC) and PC2. Abbreviations: V1,  
838 annual mean temperature (in degrees Celsius); V2, annual temperature range (in degrees  
839 Celsius); V3, isothermality (in degrees Celsius); V4, minimum temperature of the coldest  
840 month (in degrees Celsius); V5, maximum temperature of the warmest month (in degrees  
841 Celsius); V6, mean temperature of the coldest quarter (in degrees Celsius); V7, precipitation  
842 seasonality (in millimetres); V8, precipitation in the warmest quarter (in millimetres); V9,  
843 precipitation in the coldest quarter (in millimetres); V10, mean solar radiation (in kilojoules

844 per square metre per day); V11, minimum solar radiation (in kilojoules per square metre per  
845 day); V12, maximum solar radiation (in kilojoules per square metre per day); V13, mean  
846 wind speed (in metres per second); V14, maximum vapour pressure deficit (in kilopascals);  
847 V15, mean annual sea surface salinity (in practical salinity units); V16, sea surface salinity in  
848 the saltiest month (in practical salinity units); V17, annual variance in sea surface salinity (in  
849 practical salinity units); V18, mean annual sea surface temperature (in degrees Celsius); V19,  
850 sea surface temperature in the coldest month (in degrees Celsius); V20, annual range in sea  
851 surface temperature (in degrees Celsius); V21, annual average cycle amplitude (in  
852 centimetres); V22, annual average duration of tidal cycles (in hours); V23, annual number of  
853 cycles.

854 **Figure 4.** Graphical representations showing the correlations among genetic distance,  
855 geographical distance, environmental distance and the oceanographic barrier for *Avicennia*  
856 *schaueriana*. A, geographical distance vs. genetic distance. B, environmental distance vs.  
857 genetic distance. C, absence or presence of the oceanographic barrier between population  
858 pairs vs. genetic distance (boxplot). D, geographical distance vs. environmental distance. The  
859 relationships between genetic and geographical distances and between genetic distances and  
860 the oceanographic barrier were significant according to the partial Mantel tests (Table 2).

861 **Figure 5.** Graphical representations showing the correlations among genetic distance,  
862 geographical distance, environmental distance and the oceanographic barrier for *Avicennia*  
863 *germinans*. A, geographical distance vs. genetic distance. B, environmental distance vs.  
864 genetic distance. C, absence or presence of the oceanographic barrier between population  
865 pairs vs. genetic distance (boxplot). D, geographical distance vs. environmental distance.  
866 Among the relationships presented, only the environmental distance was significantly  
867 correlated with the genetic distance as indicated by the partial Mantel tests (Table 4).

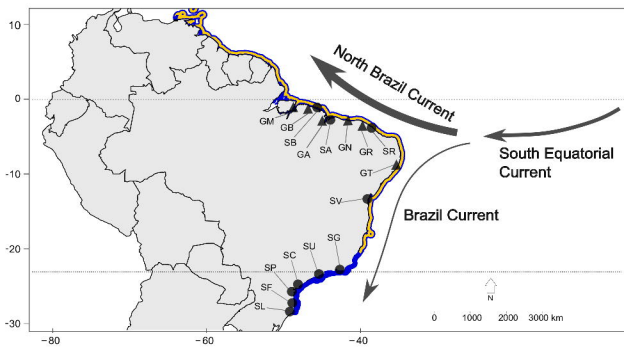

A

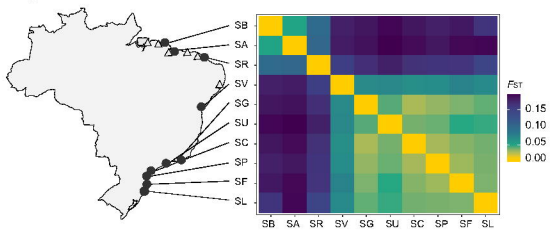

B

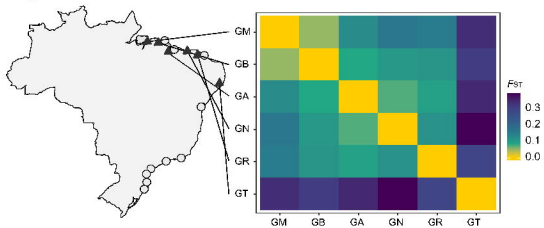



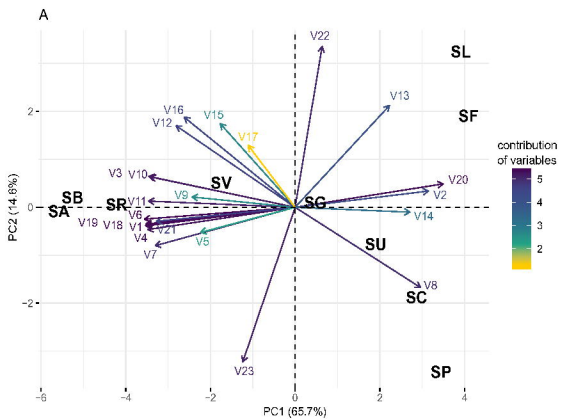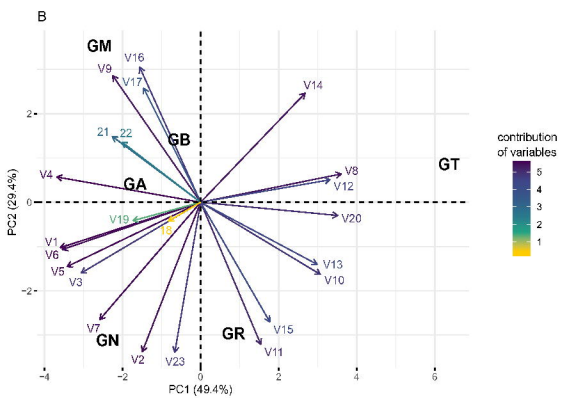

*A. schaueriana*

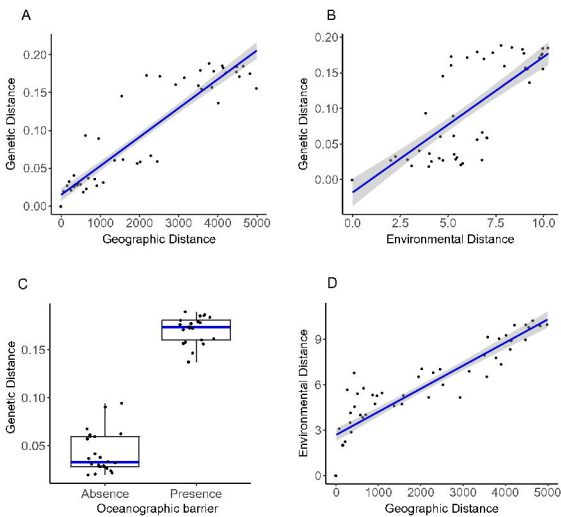

*A. germinans*

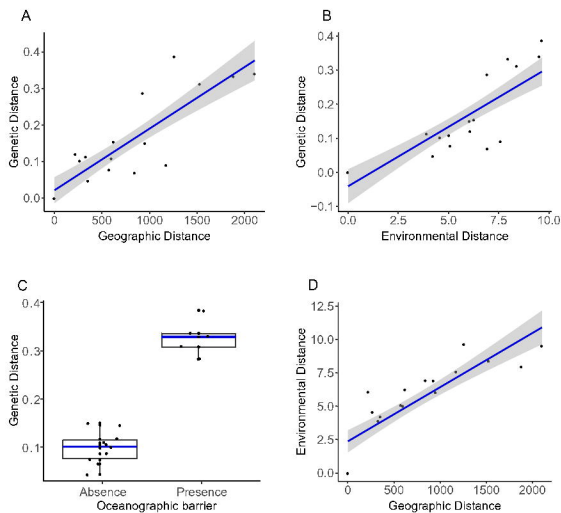

Source: https://www.biorxiv.org/content/10.1101/2020.01.08.889717.full.pdf
