# 1 **Geographic and environmental contributions to genomic divergence in mangrove forests**

2 Michele Fernandes da Silva<sup>1</sup>, Mariana Vargas Cruz<sup>1</sup>; João de Deus Vidal Júnior<sup>1</sup>, Gustavo  
3 Maruyama Mori<sup>2</sup>, Maria Imaculada Zucchi<sup>3</sup>, Anete Pereira de Souza<sup>1\*</sup>

4

5 <sup>1</sup> Institute of Biology, Center for Molecular Biology and Genetic Engineering, University of  
6 Campinas (Unicamp), Campinas, SP 13083-875

7 <sup>2</sup> Institute of Biosciences, São Paulo State University (Unesp), São Vicente, SP 11330-900,  
8 Brazil

9 <sup>3</sup> São Paulo Agency for Agribusiness Technology (APTA), Piracicaba, SP 13400-790, Brazil

10 \* Author for correspondence. E-mail: anete@unicamp.br

11

## 12 **ABSTRACT**

13 Assessing the relative importance of geographic and environmental factors to the spatial  
14 distribution of genetic variation can provide relevant information about the underlying processes  
15 that cause and maintain genetic variation in natural populations. With a globally wide but very  
16 restricted habitat distribution, mangrove trees are an interesting model for studies aiming to  
17 understand the contributions of these factors. Mangroves occur in a narrow range on the  
18 continent-ocean interface of tropical and subtropical latitudes, regions considered inhospitable to  
19 many other plant types. We employed landscape genomics approaches to investigate the relative  
20 contributions of geographic and environmental variables to the genetic structures of two  
21 mangrove species, *Avicennia schaueriana* and *A. germinans*, along the Brazilian coast. Using  
22 neutral and putative non-neutral single nucleotide polymorphisms (SNPs), we observed  
23 significant correlations between the genetic structure and geographical distance, air and sea  
24 surface temperatures, solar radiation and tidal variation for both species. In addition, we found  
25 that the South Equatorial Current (SEC) acts as a barrier to gene flow among *A. schaueriana*  
26 populations. These results increase our knowledge about the evolution of mangrove trees and

27 suggest that geographical and environmental variables may shape adaptations of New World

28 *Avicennia* species.

29

30 **KEYWORDS**

31 Black mangrove; landscape genomics; ocean currents; isolation by environment; gene flow;

32 coastal ecosystem

## 33 INTRODUCTION

34 Environmental and geographic variations are often determinants of the distribution of  
35 allele frequencies in natural populations, facilitating or limiting gene flow across space and  
36 influencing the selection of certain genotypes (Murray et al., 2019; Sork, 2016; Wang, Glor, &  
37 Losos, 2013). For example, under an Isolation By Distance (IBD) model (Wright, 1943),  
38 geographic distance may limit the dispersion and reproductive material of organisms, leading to  
39 the accumulation of allele frequency divergences by genetic drift (Bradburd, Ralph, & Coop,  
40 2013). Furthermore, under the Isolation By Barrier (IBB) model, a barrier to gene flow may  
41 abruptly reduce or even disrupt connectivity between individuals of a species (Barton, 1979). In  
42 addition to these models, landscape components may exert divergent selective pressures on  
43 individuals, leading to the evolution of locally adapted populations (Bradburd et al., 2013), a  
44 phenomenon described by the Isolation By Environment (IBE) model (Wang & Bradburd, 2014).

45 These standards, IBD, IBB, and IBE, are not usually mutually exclusive and often co-  
46 occur in nature (Sexton, Hangartner, & Hoffmann, 2014; Wang et al., 2013). Determining the  
47 contribution of each model to the distribution patterns of genetic variation across space can  
48 provide relevant information about the underlying processes that cause and maintain genetic  
49 variation in natural populations (Lee & Mitchell-Olds, 2011; Wang & Bradburd, 2014). This  
50 knowledge is also essential to predict future responses of current populations to environmental  
51 changes (Vincent, Dionne, Kent, Lien, & Bernatchez, 2013) and to minimize biodiversity loss  
52 (Kovach, Gharrett, & Tallmon, 2012; Muñoz, Farrell, Heath, & Neff, 2015; Wee et al., 2019).

53 The field of research that seeks to disentangle the roles of these factors in the distribution  
54 of the neutral and adaptive genetic variability of a species over space is known as landscape  
55 genomics (Joost et al., 2007; Schoville et al., 2012; Vincent et al., 2013). Recently, this approach

56 has been increasingly applied to the study of non-model organisms (Storfer, Patton, & Fraik,  
57 2018). Nevertheless, most landscape genomic studies are limited to animal species, with few  
58 such studies on tropical plant species (Storfer, Murphy, Spear, Holderegger, & Waits, 2010) and  
59 coastal species such as mangroves, in which adaptive convergences act to allow survival in an  
60 environment considered hostile to several other types of plants (Tomlinson, 1986).

61 Mangrove trees occur in a narrow strip on the continent-ocean interface (Tomlinson,  
62 1986). Mangrove species have the ability to disperse over long distances by river and ocean  
63 surface currents (van der Stocken, Wee, et al., 2019) and are found in tropical and subtropical  
64 latitudes of the world, mainly between 30 °N and 30 °S (Giri et al., 2011). The distribution of  
65 mangroves is limited by the topography of the intertidal zone (Middleton, 2012), the occurrence  
66 of low temperatures (Morrisey et al., 2010) and precipitation patterns (Spalding, Blasco, & Field,  
67 1997). Moreover, there are variations in the latitudes of their boundaries mainly associated with  
68 different climatic thresholds (Cavanaugh et al., 2018; Osland et al., 2017) and oceanographic  
69 conditions (Soares, Estrada, Fernandez, & Tognella, 2012).

70 In Brazil, mangroves are distributed along most of the Atlantic coast, from Amapá state  
71 (04° 20' N) to Santa Catarina (28° 30' S). Along this latitudinal gradient, six species of mangrove  
72 trees belonging to three genera have been found. Among these genera, *Avicennia* L.  
73 (Acanthaceae) is one of the most diverse and widely distributed genus globally (Duke, 1991; Li  
74 et al., 2016) and is represented on the coast of Brazil by two of the three New World *Avicennia*  
75 species, *Avicennia germinans* and *Avicennia schaueriana* (Duke, 1991; Schaeffer-Novelli et al.,  
76 1990). These species occur in sympatry on the northeast coast of Brazil. While *A. germinans* has  
77 a distribution limit of northern Rio de Janeiro state, *A. schaueriana* extends to the southern state  
78 of Santa Catarina.

79 Both species show a striking north-south pattern of genetic divergence among  
80 populations along the Brazilian coast, as suggested by microsatellite markers (Mori, Zucchi, &  
81 Souza, 2015). Similar results were obtained for another mangrove species, *Rhizophora mangle*  
82 (Francisco, Mori, Alves, Tambarussi, & de Souza, 2018; Pil et al., 2011), and for the mangrove-  
83 associated tree *Hibiscus pernambucensis* (Takayama, Tateishi, Murata, & Kajita, 2008) using the  
84 same type of molecular marker. These studies suggested that the neutral genetic divergence may  
85 have been convergently shaped by the dispersion of floating propagules in water. When the  
86 South Equatorial current (SEC) reaches the Atlantic coast of South America, it splits in two  
87 different directions (northwards and southwards) along the coast (Lumpkin & Johnson, 2013).  
88 The split of the SEC is concordant with the remarkable genetic divergence observed among the  
89 northern and southern populations of mangrove trees along the Brazilian coast.

90 Using data obtained by next-generation sequencing (NGS), recent studies have identified  
91 variable genomic regions possibly associated with adaptive processes relevant in the  
92 environmental context of mangroves (Cruz, Mori, Müller, et al., 2019, Cruz, Mori, Oh, et al.,  
93 2019). These variations have been attributed to climatic and oceanographic factors that vary  
94 widely along the latitudinal gradient of the species distribution.

95 Although these studies provide clues as to which abiotic factors act to differentiate  
96 between *A. schaueriana* and *A. germinans* populations, the contribution of each abiotic factor is  
97 still unknown. In this context, the present study aimed to investigate the relative contribution of  
98 geographic and environmental variables in the organization of genetic diversity of the two  
99 species in the genus *Avicennia* L. (Acanthaceae) found on the Atlantic coast of South America.

100

## 101 MATERIALS AND METHODS

102

### 103 **Biological material and genotyping of SNP markers**

104           The collection of biological material and the identification of single nucleotide  
105 polymorphism (SNP) markers were performed in the context of a previous study by Cruz, Mori,  
106 Müller, et al. (2019) and Cruz, Mori, Oh, et al. (2019). They sampled 77 *A. schaueriana*  
107 individuals from ten different locations and 48 individuals of *A. germinans* from six different  
108 locations along the Brazilian coast (Fig. 1 and Table 1). With a minimum coverage of 8x and a  
109 minor allele frequency  $\geq 0.05$ , totals of 6170 and 2297 SNP markers were identified for *A.*  
110 *schaueriana* and *A. germinans*, respectively.

111

### 112 **Detection of SNP loci with selective signatures**

113           SNP loci with evidence of natural selection were detected by Cruz, Mori, Müller, et al.  
114 (2019) and Cruz, Mori, Oh, et al. (2019). For *A. schaueriana*, 86 loci showed considerable  
115 deviations from neutral expectations of interpopulation divergence. They were detected by two  
116 methods to minimize false positives: LOSITAN (Antao, Lopes, Lopes, Beja-Pereira, & Luikart,  
117 2008), with a confidence interval of 0.99 and a false-discovery rate (FDR) of 0.1, and pcadapt  
118 (Luu, Bazin, & Blum, 2017), with a FDR of 0.1. For *A. germinans*, 25 loci showed considerable  
119 deviations from neutral expectations of interpopulation divergence. For this species, in addition  
120 to LOSITAN (confidence interval of 0.99 and FDR of 0.05) and pcadapt (FDR of 0.05), SNP  
121 loci associated with ecological variables were detected using latent factor mixed models  
122 (LFMM) implemented in the LEA package (Frichot & François, 2015).

123

### 124 **Estimation of genetic distances**

125 To analyze the importance of geographic distance and environmental variables in spatial  
126 genetic divergence, we evaluated which of the models - isolation by distance (IBD), isolation by  
127 barrier (IBB) or isolation by environment (IBE) - best describes the genetic diversity of each  
128 species based on the SNP markers. For this, we estimated the genetic differentiation (Wright's  
129  $F_{ST}$ ) between pairs of sampling sites (Wright, 1949) for the total set of SNP molecular markers  
130 and the set of SNP markers with evidence of selection, using the *Hierfstat* package for R  
131 (Goudet, 2005).

132

### 133 **Estimation of geographic distances**

134 Pairwise geographic distances between populations were measured using the geographic  
135 coordinates of the sampling sites (Table 1) with the global positioning system (Garmin 76CSx,  
136 WGS-84 standard, Garmin International Inc., Olathe, KS, USA). Distances between points were  
137 estimated based on the contour of the Brazilian coast; thus, dispersion by floating propagules  
138 (Duke, Ball, & Ellison, 1998), which are often transported by surface ocean currents (van der  
139 Stocken, Carroll, Menemenlis, Simard, & Koedam, 2019), was considered. To determine  
140 whether the bifurcation from the southern branch of the SEC to the Brazil current (BC) and the  
141 North Brazil current (NBC) (Lumpkin & Johnson, 2013) (Fig. 1) acts as a dispersion barrier for  
142 *A. germinans* and *A. schaueriana* propagules, a binary matrix (0 or 1) was constructed based on  
143 the presence (1) or absence (0) of the barrier between each pair of sampling sites.

144

### 145 **Estimation of environmental distances**

146 To evaluate the effect of the environment, we obtained a total of 37 environmental  
147 variables for each sampling site, with a resolution of 30 arc-seconds (~ 1 km in Ecuador). In our

148 dataset, we included 28 climate variables derived from the WorldClim temperature and  
149 precipitation datasets (version 1.4 and 2.0) (Fick & Hijmans, 2017), 10 oceanographic variables  
150 derived from the Marspec ocean surface salinity and temperature datasets (Sbrocco & Barber, 2013)  
151 and five variables related to tidal variations retrieved from the Environmental Climate Data  
152 Sweden (ECDS) platform (Klein et al., 2013). To avoid nonindependence between  
153 environmental variables, we removed variables that showed a high correlation ( $R^2 > 0.8$ ), as  
154 measured by the *removeCollinearity* function of the *virtualspecies* package (Leroy, Meynard,  
155 Bellard, & Courchamp, 2016) for R Core Team (2019). We extracted the values of the  
156 environmental variables for our sample points using the *raster* package (Hijmans & van Etten,  
157 2012) for R Core Team (2019). All occurrence data have been carefully inspected to detect and  
158 correct problems associated with inconsistent records (Chapman, 2005). We transformed this  
159 environmental data matrix using a principal component analysis (PCA) to calculate the  
160 Euclidean distances between population pairs (Lira-Noriega & Manthey, 2014). For this  
161 calculation, we used the averages of the first five principal components for *A. schaueriana* and  
162 the first three principal components for *A. germinans*. Principal component analysis and  
163 environmental distance measurements were all performed in R (R Core Team, 2019).

164

### 165 **Associative tests**

166 To test which model best explained our genetic data (both neutral and putatively non-  
167 neutral), we performed Multiple Matrix Regression with Randomization (MMRR). This method  
168 was employed to estimate the independent effect of each factor (geographic or environmental  
169 variable) and has been shown to be robust toward a wide range of dispersal rates (Wang, 2013).  
170 The analysis was performed using the *MMRR* function in R with 10,000 permutations. The



171 following comparisons were made: (I) geographic distance between populations (km) and  
172 population differentiation (FST), (II) environmental distance between populations (PCA) and  
173 population differentiation (FST), (III) geographic distance (km) and environmental distance  
174 (PCA), (IV) geographic distance (km) in conjunction with environmental distance (PCA) and  
175 population differentiation (FST) and (V) the presence / absence of the oceanic barrier and  
176 population differentiation (FST). We also tested for correlations between the genetic distances  
177 based on the SNP marker set with selection evidence for each environmental variable separately.

178

## 179 **RESULTS**

180

### 181 **Genetic, geographic and environmental distances**

182 For the total set of SNP markers, we found FST values between 0.019 and 0.189 for pairs  
183 of *A. schaueriana* populations and between 0.047 and 0.387 for pairs of *A. germinans*  
184 populations (Fig. 2). For the set of markers with evidence of selection, these values ranged from  
185 0.02 to 0.36 for *A. schaueriana* and from 0.03 to 0.88 for *A. germinans*. The pairwise geographic  
186 distances had a maximum value of approximately 5000 km between Bragança - PA (PAR) and  
187 Laguna - SC (LGN) for *A. schaueriana* and 2100 km between Ilha de Marajó in Soure – PA  
188 (MRJ) and Tamandaré - PE (TMD) for *A. germinans*.

189 After removing the environmental variables with high correlation ( $R^2 > 0.8$ ), 21 variables  
190 were retained for further analyses (Fig. 3). The first five and three axes of PCA based on  
191 noncollinear environmental variable matrices explained 96% and 92% of the variance for *A.*  
192 *schaueriana* and *A. germinans*, respectively. The first PCA axis used for the environmental  
193 distance calculation among sampling locations of *A. schaueriana* represented 59% of the

194 variance (Fig. 4A) and was mainly explained by the water vapor pressure, annual average sea  
195 surface temperature, isothermality, average and minimum solar radiation and average annual  
196 temperature (Fig. 5A). The second PCA axis represented 15% of the variance (Fig. 4B) and was  
197 mainly explained by the average annual tidal cycle duration, annual precipitation and wind  
198 speed. For *A. germinans*, the first PCA axis represented 43% of the variance (Fig. 4B) and was  
199 mainly explained by the average solar radiation, water vapor pressure, precipitation of the hottest  
200 and coldest quarters and wind speed (Fig. 5B). The second PCA axis represented 32% of the  
201 variance (Fig. 4B) and was mainly explained by the annual temperature variation, annual average  
202 temperature and precipitation seasonality.

203

#### 204 **Association tests**

205         For *A. schaueriana*, linear regressions between geographic, environmental, and genetic  
206 variables for the total set of SNPs revealed a strong correlation between geographic and  
207 environmental distances ( $R^2 = 0.82$ ;  $P < 0.001$ ) (Fig. 6A). The geographic distances between  
208 pairs of sampling sites played the greatest role in the describing genetic distances ( $R^2: 0.81$ ,  $P <$   
209  $0.001$ ) (Fig. 6B), but environmental distance also contributed significantly to genetic distance ( $R^2$   
210  $= 0.56$ ,  $P < 0.001$ ) (Fig. 6C). When the tests were performed separately for sampling locations  
211 above and below the SEC, we found significant correlations only for sampling locations below  
212 the SEC between genetic and geographic distances ( $R^2 = 0.81$ ;  $P < 0.001$ ) and between genetic  
213 and environmental distances ( $R^2 = 0.40$ ;  $P = 0.05$ ). In relation to genetic distance, multiple  
214 regression combining the effects of geographic and environmental distances provided a  
215 significantly better fit ( $R^2 = 0.84$ ;  $P = 0.0007$ ) than multiple regressing including only one effect.

216 The variable that best explained the genetic differentiation observed in *A. schaueriana* was the  
217 presence or absence of the oceanographic barrier ( $R^2 = 0.92$ ,  $P = 0.005$ ).

218 For *A. germinans*, the correlation between geographic and environmental distances was  
219 significant ( $R^2 = 0.63$ ;  $P < 0.001$ ) (Fig. 6D) but was less pronounced than the correlation for *A.*  
220 *schaueriana*, probably due to the smaller number of sampling locations for the former specie  
221 than the latter specie. Geographic ( $R^2 = 0.61$ ;  $P < 0.05$ ) (Fig. 6E) and environmental ( $R^2 = 0.42$ ;  
222  $P < 0.05$ ) (Fig. 6F) distances played significant roles in the genetic differentiation between *A.*  
223 *germinans* sampling sites. However, when we removed the samples from Tamandaré - PE, which  
224 is located below the SEC, the genetic divergence was not correlated with either the geographic  
225 distance ( $R^2 = 0.006$ ;  $P = 0.97$ ) or the environmental distance ( $R^2 = 0.014$ ;  $P = 0.70$ ). Multiple  
226 regressions combining the geographic and environmental distances showed a significant  
227 correlation ( $R^2 = 0.63$ ;  $P = 0.05$ ) with genetic differentiation, but this correlation was smaller  
228 than the correlations observed separately for geographic and genetic divergences. The presence  
229 or absence of the oceanic barrier did not explain the genetic divergence among *A. germinans*  
230 sampling locations ( $R^2 = 0.91$ ;  $P = 0.15$ ), probably because only one location below the SEC was  
231 sampled.

232 We identified a significant environmental contribution to the genetic differentiation based  
233 on the presumably non-neutral SNPs for both species. This contribution was more pronounced  
234 for *A. schaueriana* ( $R^2 = 0.55$ ;  $P < 0.001$ ) than for *A. germinans* ( $R^2 = 0.38$ ;  $P = 0.05$  0.15).  
235 When we analyzed each environmental variable separately, we found significant correlations of  
236 non-neutral genetic differentiation among *A. schaueriana* sampling locations with tidal  
237 amplitude cycles, air and ocean surface temperature variations, water vapor pressure, solar

238 radiation, and precipitation regimes. The non-neutral genetic differentiation observed in *A.*  
239 *germinans* was significantly correlated with solar radiation and temperature variables (Table 2).

240

## 241 **DISCUSSION**

242 The study of the geographic and environmental factors shaping neutral and adaptive  
243 genetic variation in heterogeneous environments is one of the main approaches used to  
244 understand the dynamics and evolutionary potential of natural populations (Li et al., 2017;  
245 Schoville et al., 2012). In this study, we separated the relative contributions of the environment,  
246 geographic distance and the presence of an oceanic barrier on the genetic differentiation of  
247 populations of two non-model mangrove tree species. We found the relative importance of the  
248 main environmental variables that generate adaptation in these species, which is a particularly  
249 relevant finding, considering the challenges presented by the climate change predicted for this  
250 century.

251 According to Wright (1978), our pairwise  $F_{ST}$  results revealed an intermediate degree of  
252 genetic differentiation for both species based on the total set of SNP markers, while *A.*  
253 *schaueriana* and *A. germinans* had an intermediate degree and an intermediate to high degree of  
254 genetic differentiation, respectively, based on the set of non-neutral SNPs. These results  
255 corroborate the genetic structure patterns found in previous studies conducted with neutral  
256 molecular markers (Francisco et al., 2018; Mori et al., 2015; Pil et al., 2011; Takayama et al.,  
257 2008) and indicate that, regardless of the characteristics of these markers with high  
258 (microsatellite) (Vieira, Santini, Diniz, & Munhoz, 2016) or low (SNPs) (Morin, Luikart,  
259 Wayne, & The SNP Workshop Group, 2004) mutation rates, the evolutionary processes that led  
260 to this divergence must be quite intense or old.

261           The geographic distances between sampling sites contributed significantly to the genetic  
262 divergence of *A. schaueriana* ( $R^2$ : 0.81,  $P < 0.001$ ) and *A. germinans* ( $R^2 = 0.61$ ;  $P < 0.05$ ),  
263 suggesting that the isolation by distance (IBD) model (Wright, 1943) plays a fundamental role in  
264 the evolution of spatial divergence of these species. This model appears to be typical of  
265 mangroves (Cerón-Souza et al., 2010; Kennedy et al., 2016; Ochoa-Zavala, Jaramillo-Correa,  
266 Piñero, Nettel-Hernanz, & Núñez-Farfán, 2019; Sandoval-Castro et al., 2014). Although there is  
267 evidence of long-distance dispersal by river and ocean surface currents for mangrove species  
268 (Mori et al., 2015; Nettel & Dodd, 2007; Takayama, Tamura, Tateishi, Webb, & Kajita, 2013;  
269 van der Stocken, Wee, et al., 2019), our results indicate that the large extension of the Brazilian  
270 coast limits the dispersal of *Avicennia* species. Although these correlations were significant for  
271 the total set of sampling locations, they were not significant when considering only the set of *A.*  
272 *schaueriana* and *A. germinans* sampling locations above the SEC. For the five sampling  
273 locations of *A. germinans* in this region, which are distributed in a fairly geographically  
274 continuous habitat, little of the model was explained by the coefficient of determination values  
275 ( $R^2 = 0.006$ ,  $p = 0.97$ ). We hypothesized that the genetic differentiation between 0.047 and 0.387  
276 observed for all sampling locations could actually be the result of an isolation by barrier (IBB)  
277 effect caused by the SEC acting as a barrier to the dispersal of propagules. However, we did not  
278 find a significant correlation between genetic differentiation and the presence of the SEC,  
279 probably because we sampled *A. germinans* in only one location (Tamandaré - PE) south of the  
280 SEC.

281           In contrast, we found statistical evidence for the action of the SEC as a barrier to gene  
282 flow for *A. schaueriana*. Our results corroborate Mori et al. (2015), who suggested that the  
283 neutral genetic divergence observed for *A. schaueriana* may have been shaped by marine

284 currents. Our results also suggest that the SEC may have a key role in shaping the distribution of  
285 genetic variation observed in other species of mangrove or associated with this ecosystem, such  
286 as *Rhizophora mangle* (Francisco et al., 2018; Pil et al., 2011) and *Hibiscus pernambucensis*  
287 (Takayama et al., 2008). Our findings suggest that the SEC is an important driver of the genetic  
288 structure of mangrove species; however, coastal and ocean currents vary temporally in strength  
289 and directionality (van der Stocken, Carroll, et al., 2019). For example, The SEC splits, forming  
290 the BC and the NBC, which have different speeds and directions (Lumpkin & Johnson, 2013)  
291 (Fig. 1). NBC is faster than BC, favoring the spread of propagules from south to north, as  
292 observed in previous studies (Francisco et al., 2018; Mori et al., 2015). Therefore, future  
293 investigations about the dynamics of these currents, not as a static barrier but including different  
294 levels of resistance to gene flow, may provide more accurate information about their influence  
295 on the distribution of genetic variation of species dispersed by sea currents.

296 We also identified an isolation by environment (IBE) pattern in the structure of the  
297 genetic diversity of *A. schaueriana* and *A. germinans* that was driven mainly by temperature,  
298 radiation and tidal variations along the Brazilian coast. Under the IBE pattern, genetic  
299 differentiation increases in response to environmental differences, regardless of geographic  
300 distance, and can be generated by a variety of ecological processes, such as selection against  
301 immigrants, which implies local adaptation to heterogeneous environments (Wang & Bradburd,  
302 2014). Many species under IBE show local adaptations to environmental gradients (Barker,  
303 Frydenberg, Sarup, & Loeschcke, 2011; Byars, Parsons, & Hoffmann, 2009; Jiang et al., 2019;  
304 Manthey & Moyle, 2015; Mitchell-Olds, Willis, & Goldstein, 2007; Sexton et al., 2014; Shafer  
305 & Wolf, 2013).

306           Given the significant results for IBE, we also estimated the contribution of each  
307 environmental variable, allowing us to infer the degree to which individual environmental  
308 variables contribute to these results. For *A. schaueriana*, we found that genetic variation with  
309 evidence of selection is correlated with spatial variations in the tidal range regimes, air and ocean  
310 surface temperature, water vapor pressure, solar radiation, and precipitation (Table 2). Our  
311 results corroborate Cruz, Mori, Oh, et al. (2019), who analyzed two *A. schaueriana* populations  
312 in contrasting regions of the Brazilian coast and found evidence of selection in genes associated  
313 with biological processes related to climate seasonality and the response to UV radiation.  
314 Conversely, for *A. germinans*, we found correlations between the non-neutral genetic  
315 differentiation with variations in solar radiation and temperature patterns (Table 2). The results  
316 that we observed for both species corroborate other studies that found precipitation and air and  
317 sea temperature variables were limiting factors in the distribution of coastal species (Cavanaugh  
318 et al., 2018; Duke et al., 2017; McKee, Rogers, & Saintilan, 2012; Osland et al., 2016; Soares et  
319 al., 2012; Ximenes, Ponsoni, Lira, Koedam, & Dahdouh-Guebas, 2018). In addition, our results  
320 may serve as a starting point for understanding the adaptations of *Avicennia* species of the South  
321 American coast, contributing to the understanding of the evolution of genetic divergence within  
322 this genus. Furthermore, this study may guide further investigations about the responses of these  
323 species to climate change, such as the predicted increases in the annual average temperatures of  
324 air and oceans and the rise in sea level (IPCC, 2014).

325

## 326 **CONCLUSIONS**

327           Our results provide strong evidence that IBD and IBE contributed to the evolution of  
328 spatial genetic divergence within two *Avicennia* neotropical species on the Atlantic coast of

329 South America. A great proportion of the genetic divergence observed within both species may  
330 be attributed to IBD. The patterns of genetic divergence were also correlated with variations in  
331 the atmospheric temperature, solar radiation and tidal range for both species. In addition, we  
332 observed significant correlations with the latitudinal gradient of precipitation and sea surface  
333 temperature for *A. schaueriana*, suggesting that IBE also influences the genetic structure of both  
334 species. The SEC bifurcation of the Brazilian coast acts as a barrier to gene flow among *A.*  
335 *schaueriana* populations, but we suggest that the SEC speed and direction may be important  
336 factors that shape the genetic structure of populations, which requires further investigation.  
337 Overall, we provide insights into the relative contributions of environmental and geographic  
338 variables that influence the processes maintaining the distribution of genetic diversity within *A.*  
339 *schaueriana* and *A. germinans* in the Atlantic coast of South America.

340

#### 341 **DATA ARCHIVING STATEMENT**

342 Data strings supporting these findings can be found in GenBank with the primary access  
343 codes GSE116060 and GSE123659 for *A. schaueriana* and *A. germinans*, respectively.

344

#### 345 **ACKNOWLEDGMENTS**

346 We thank Alessandro Alves Pereira and Prianda Laborda for critically reading the  
347 manuscript. This study was financed in part by the Coordination for the Improvement of Higher  
348 Education Personnel - CAPES Computational Biology Program (88887.177151 / 2018-00) and  
349 by São Paulo Research Foundation - FAPESP (2018 / 18431-1).

350

351

#### 352 **LITERATURE CITED**



- 353 Antao, T., Lopes, A., Lopes, R. J., Beja-Pereira, A., & Luikart, G. (2008). LOSITAN: A  
354 workbench to detect molecular adaptation based on a  $F_{st}$ -outlier method. *BMC*  
355 *Bioinformatics*, *9*, 323.
- 356 Barker, J. S. F., Frydenberg, J., Sarup, P., & Loeschcke, V. (2011). Altitudinal and seasonal  
357 variation in microsatellite allele frequencies of *Drosophila buzzatii*. *Journal of*  
358 *Evolutionary Biology*, *24*, 430-439.
- 359 Barton, N. H. (1979). Gene flow past a cline. *Heredity*, *43*, 333-339.
- 360 Bradburd, G. S., Ralph, P. L., & Coop, G. M. (2013). Disentangling the effects of geographic  
361 and ecological isolation on genetic differentiation. *Evolution*, *67*, 3258-3273.
- 362 Byars, S. G., Parsons, Y., & Hoffmann, A. A. (2009). Effect of altitude on the genetic structure  
363 of an Alpine grass, *Poa hiemata*. *Annals of Botany*, *103*, 885-899.
- 364 Cavanaugh, K. C., Osland, M. J., Bardou, R., Hinojosa-Arango, G., López-Vivas, J. M., Parker,  
365 J. D., & Rovai, A. S. (2018). Sensitivity of mangrove range limits to climate variability.  
366 *Global Ecology and Biogeography*, *27*, 925-935.
- 367 Cerón-Souza, I., Rivera-Ocasio, E., Medina, E., Jiménez, J. A., McMillan, W. O., &  
368 Bermingham, E. (2010). Hybridization and introgression in new world red Mangroves,  
369 *Rhizophora* (*Rhizophoraceae*). *American Journal of Botany*, *97*, 945-957.
- 370 Chapman, A. D. (2005). *Principles and methods of data cleaning – Primary species and*  
371 *speciesoccurrence data*. Retrieved from  
372 [https://assets.ctfassets.net/uo17ejk9rkwj/46SfGRfOesU0IagMMAOIkk/1c03ea3e21fcd90](https://assets.ctfassets.net/uo17ejk9rkwj/46SfGRfOesU0IagMMAOIkk/1c03ea3e21fcd9025cc800d786890e72/Principles_20and_20Methods_20of_20Data_20Cleaning_20-_20ENGLISH.pdf)  
373 [25cc800d786890e72/Principles\\_20and\\_20Methods\\_20of\\_20Data\\_20Cleaning\\_20-](https://assets.ctfassets.net/uo17ejk9rkwj/46SfGRfOesU0IagMMAOIkk/1c03ea3e21fcd9025cc800d786890e72/Principles_20and_20Methods_20of_20Data_20Cleaning_20-_20ENGLISH.pdf)  
374 [\\_20ENGLISH.pdf](https://assets.ctfassets.net/uo17ejk9rkwj/46SfGRfOesU0IagMMAOIkk/1c03ea3e21fcd9025cc800d786890e72/Principles_20and_20Methods_20of_20Data_20Cleaning_20-_20ENGLISH.pdf)

- 375 Cruz, M. V., Mori, G. M., Oh, D., et al. (2019). Molecular responses to freshwater limitation in  
376 the mangrove tree *Avicennia germinans* (Acanthaceae). *Molecular Ecology*.
- 377 Cruz, M. V., Mori, G. M., Signori-Müller, et al. (2019). Local adaptation of a dominant coastal  
378 tree to freshwater availability and solar radiation suggested by genomic and  
379 ecophysiological approaches. *Scientific Reports*, 9, 19936.
- 380 Duke, N. C. (1991). A systematic revision of the mangrove genus *Avicennia* (Avicenniaceae) in Australasia.  
381 *Australian Systematic Botany*, 4, 299.
- 382 Duke, N. C., Ball, M. C., & Ellison, J. C. (1998). Factors influencing biodiversity and  
383 distributional gradients in Mangroves. *Global Ecology and Biogeography Letters*, 7(1),  
384 27.
- 385 Duke, N. C., Kovacs, J. M., Griffiths, A. D., Preece, L., Hill, D. J. E., van Oosterzee, P., . . .  
386 Burrows, D. (2017). Large-scale dieback of mangroves in Australia. *Marine and*  
387 *Freshwater Research*, 68, 1816.
- 388 Fick, S. E., & Hijmans, R. J. (2017). WorldClim 2: New 1-km spatial resolution climate surfaces  
389 for global land areas. *International Journal of Climatology*, 37, 4302-4315.
- 390 Francisco, P. M., Mori, G. M., Alves, F. M., Tambarussi, E. V., & de Souza, A. P. (2018).  
391 Population genetic structure, introgression, and hybridization in the genus *Rhizophora*  
392 along the Brazilian coast. *Ecology and Evolution*, 8, 3491-3504.
- 393 Frichot, E., & François, O. (2015). LEA: AnRpackage for landscape and ecological association  
394 studies. *Methods in Ecology and Evolution*, 6, 925-929.
- 395 Giri, C., Ochieng, E., Tieszen, L. L., Zhu, Z., Singh, A., Loveland, T., . . . Duke, N. (2011).  
396 Status and distribution of mangrove forests of the world using earth observation satellite  
397 data. *Global Ecology and Biogeography*, 20(1), 154-159.

- 398 Goudet, J. (2005). HIERFSTAT, a package for R to compute and test hierarchical F-statistics.  
399 *Molecular Ecology Notes*, 5(1), 184-186.
- 400 Hijmans, R. J., & van Etten, J. (2012). *raster: Geographic analysis and modeling with raster*  
401 *data. R package version 2.0-12*.
- 402 IPCC. (2014). Climate change 2014: Synthesis report. In IPCC (Ed.), *Climate change 2014 - The*  
403 *physical science basis* (pp. 1-30). Cambridge, MA: Cambridge University Press.
- 404 Jiang, S., Luo, M.-X., Gao, R.-H., Zhang, W., Yang, Y.-Z., Li, Y.-J., & Liao, P.-C. (2019).  
405 Isolation-by-environment as a driver of genetic differentiation among populations of the  
406 only broad-leaved evergreen shrub *Ammopiptanthus mongolicus* in Asian temperate  
407 deserts. *Scientific Reports*, 9, 12008.
- 408 Joost, S., Bonin, A., Bruford, M. W., Després, L., Conord, C., Erhardt, G., & Taberlet, P.  
409 (2007). A spatial analysis method (SAM) to detect candidate loci for selection: Towards a  
410 landscape genomics approach to adaptation. *Molecular Ecology*, 16, 3955-3969.
- 411 Kennedy, J. P., Pil, M. W., Proffitt, C. E., Boeger, W. A., Stanford, A. M., & Devlin, D. J.  
412 (2016). Postglacial expansion pathways of red Mangrove, *Rhizophora mangle*, in the  
413 Caribbean Basin and Florida. *American Journal of Botany*, 103, 260-276.
- 414 Klein, T., Langner, J., Frankenberg, B., Svensson, J., Broman, B., Bennet, C., & Langborg, T.  
415 (2013). ECDS - A Swedish research infrastructure for the open sharing of environment  
416 and climate data. *Data Science Journal*, 12, 1-9.
- 417 Kovach, R. P., Gharrett, A. J., & Tallmon, D. A. (2012). Genetic change for earlier migration  
418 timing in a pink salmon population. *Proceedings of the Royal Society B: Biological*  
419 *Sciences*, 279, 3870-3878.

- 420 Lee, C.-R., & Mitchell-Olds, T. (2011). Quantifying effects of environmental and geographical  
421 factors on patterns of genetic differentiation. *Molecular Ecology*, *20*, 4631-4642.
- 422 Leroy, B., Meynard, C. N., Bellard, C., & Courchamp, F. (2016). virtualspecies, an R package to  
423 generate virtual species distributions. *Ecography*, *39*, 599-607.
- 424 Li, X., Duke, N. C., Yang, Y., Huang, L., Zhu, Y., Zhang, Z., . . . Shi, S. (2016). Re-evaluation  
425 of phylogenetic relationships among species of the Mangrove genus *Avicennia* from  
426 Indo-West Pacific based on multilocus analyses. *PLoS One*, *11*(10), e0164453.
- 427 Li, Y., Zhang, X.-X., Mao, R.-L., Yang, J., Miao, C.-Y., Li, Z., & Qiu, Y.-X. (2017). Ten years  
428 of landscape genomics: Challenges and opportunities. *Frontiers in Plant Science*, *8*,  
429 2136.
- 430 Lira-Noriega, A., & Manthey, J. D. (2014). Relationship of genetic diversity and niche centrality:  
431 A survey and analysis. *Evolution*, *68*, 1082-1093.
- 432 Lumpkin, R., & Johnson, G. C. (2013). Global ocean surface velocities from drifters: Mean,  
433 variance, El Niño-Southern oscillation response, and seasonal cycle. *Journal of*  
434 *Geophysical Research: Oceans*, *118*, 2992-3006.
- 435 Luu, K., Bazin, E., & Blum, M. G. B. (2017). pcadapt: an R package to perform genome scans  
436 for selection based on principal component analysis. *Molecular Ecology Resources*,  
437 *17*(1), 67-77.
- 438 Manthey, J. D., & Moyle, R. G. (2015). Isolation by environment in white-breasted Nuthatches  
439 (*Sitta carolinensis*) of the Madrean Archipelago sky islands: A landscape genomics  
440 approach. *Molecular Ecology*, *24*, 3628-3638.
- 441 McKee, K., Rogers, K., & Saintilan, N. (2012). Response of salt marsh and Mangrove wetlands  
442 to changes in atmospheric CO<sub>2</sub>, climate, and sea level. In B. A. Middleton (Ed.), *Global*

- 443            *change and the function and distribution of wetlands* (pp. 63-96). Dordrecht,  
444            Netherlands: Springer Netherlands.
- 445    Middleton, B. A. (2012). *Global change and the function and distribution of wetlands*.  
446            Dordrecht, Netherlands: Springer.
- 447    Mitchell-Olds, T., Willis, J. H., & Goldstein, D. B. (2007). Which evolutionary processes  
448            influence natural genetic variation for phenotypic traits? *Nature Reviews Genetics*, 8,  
449            845-856.
- 450    Mori, G. M., Zucchi, M. I., & Souza, A. P. (2015). Multiple-geographic-scale genetic structure  
451            of two Mangrove tree species: The roles of mating system, hybridization, limited  
452            dispersal and extrinsic factors. *PLoS One*, 10(2), e0118710.
- 453    Morin, P. A., Luikart, G., Wayne, R. K., & The SNP Workshop Group. (2004). SNPs in ecology,  
454            evolution and conservation. *Trends in Ecology & Evolution*, 19, 208-216.
- 455    Morrisey, D. J., Swales, A., Dittmann, S., Morrison, M. A., Lovelock, C. E., & Beard, C. M.  
456            (2010). The ecology and management of temperate mangroves. In R. N. Gibson, R. J. A.  
457            Atkinson, & J. D. M. Gordon (Eds.), *Oceanography and marine biology: An annual*  
458            *review* (pp. 43-160). Boca Raton, FL: Chapman and Hall/CRC.
- 459    Muñoz, N. J., Farrell, A. P., Heath, J. W., & Neff, B. D. (2015). Adaptive potential of a Pacific  
460            salmon challenged by climate change. *Nature Climate Change*, 5(2), 163-166.
- 461    Murray, K. D., Janes, J. K., Jones, A., Bothwell, H. M., Andrew, R. L., & Borevitz, J. O. (2019).  
462            Landscape drivers of genomic diversity and divergence in woodland *Eucalyptus*.  
463            *Molecular Ecology*, 28, 5232-5247.
- 464    Nettel, A., & Dodd, R. S. (2007). Drifting propagules and receding swamps: Genetic footprints  
465            of Mangrove recolonization and dispersal along tropical coasts. *Evolution*, 61, 958-971.

- 466 Ochoa-Zavala, M., Jaramillo-Correa, J. P., Piñero, D., Nettel-Hernanz, A., & Núñez-Farfán, J.  
467 (2019). Contrasting colonization patterns of black mangrove (*Avicennia germinans* (L.)  
468 L.) gene pools along the Mexican coasts. *Journal of Biogeography*, *46*, 884-898.
- 469 Osland, M. J., Enwright, N. M., Day, R. H., Gabler, C. A., Stagg, C. L., & Grace, J. B. (2016).  
470 Beyond just sea-level rise: Considering macroclimatic drivers within coastal wetland  
471 vulnerability assessments to climate change. *Global Change Biology*, *22*(1), 1-11.
- 472 Osland, M. J., Feher, L. C., Griffith, K. T., Cavanaugh, K. C., Enwright, N. M., Day, R. H., . . .  
473 Rogers, K. (2017). Climatic controls on the global distribution, abundance, and species  
474 richness of Mangrove forests. *Ecological Monographs*, *87*, 341-359.
- 475 Pil, M. W., Boeger, M. R. T., Muschner, V. C., Pie, M. R., Ostrensky, A., & Boeger, W. A.  
476 (2011). Postglacial north-south expansion of populations of *Rhizophora mangle*  
477 (*Rhizophoraceae*) along the Brazilian coast revealed by microsatellite analysis. *American*  
478 *Journal of Botany*, *98*, 1031-1039.
- 479 R Core Team. (2019). *A language and environment for statistical computing*. Retrieved from  
480 <https://www.r-project.org/>
- 481 Sandoval-Castro, E., Dodd, R. S., Riosmena-Rodríguez, R., Enríquez-Paredes, L. M., Tovilla-  
482 Hernández, C., López-Vivas, J. M., . . . Muñoz-Salazar, R. (2014). Post-glacial expansion  
483 and population genetic divergence of Mangrove species *Avicennia germinans* (L.) Stearn  
484 and *Rhizophora mangle* L. along the Mexican coast. *PLoS One*, *9*(4), e93358.
- 485 Sbrocco, E. J., & Barber, P. H. (2013). MARSPEC: Ocean climate layers for marine spatial  
486 ecology. *Ecology*, *94*, 979.

- 487 Schaeffer-Novelli, Y., Cintrón-Molero, G., Adaime, R. R., de Camargo, T. M., Cintron-Molero,  
488 G., & de Camargo, T. M. (1990). Variability of Mangrove ecosystems along the Brazilian  
489 coast. *Estuaries*, *13*, 204-218.
- 490 Schoville, S. D., Bonin, A., François, O., Lobreaux, S., Melodelima, C., & Manel, S. (2012).  
491 Adaptive genetic variation on the landscape: Methods and cases. *Annual Review of*  
492 *Ecology, Evolution, and Systematics*, *43*(1), 23-43.
- 493 Sexton, J. P., Hangartner, S. B., & Hoffmann, A. A. (2014). Genetic isolation by environment or  
494 distance: Which pattern of gene flow is most common? *Evolution*, *68*(1), 1-15.
- 495 Shafer, A. B. A., & Wolf, J. B. W. (2013). Widespread evidence for incipient ecological  
496 speciation: A meta-analysis of isolation-by-ecology. *Ecology Letters*, *16*, 940-950.
- 497 Soares, M. L. G., Estrada, G. C. D., Fernandez, V., & Tognella, M. M. P. (2012). Southern limit  
498 of the Western South Atlantic Mangroves: Assessment of the potential effects of global  
499 warming from a biogeographical perspective. *Estuarine, Coastal and Shelf Science*, *101*,  
500 44-53.
- 501 Sork, V. L. (2016). Gene flow and natural selection shape spatial patterns of genes in tree  
502 populations: Implications for evolutionary processes and applications. *Evolutionary*  
503 *Applications*, *9*, 291-310.
- 504 Spalding, M., Blasco, F., & Field, C. (1997). *World mangrove atlas*. Japan: Okinawa.
- 505 Storfer, A., Murphy, M. A., Spear, S. F., Holderegger, R., & Waits, L. P. (2010). Landscape  
506 genetics: Where are we now? *Molecular Ecology*, *19*, 3496-3514.
- 507 Storfer, A., Patton, A., & Fraik, A. K. (2018). Navigating the interface between landscape  
508 genetics and landscape genomics. *Frontiers in Genetics*, *9*. doi:  
509 10.3389/fgene.2018.00068

- 510 Takayama, K., Tamura, M., Tateishi, Y., Webb, E. L., & Kajita, T. (2013). Strong genetic  
511 structure over the American continents and transoceanic dispersal in the mangrove genus  
512 *Rhizophora* (Rhizophoraceae) revealed by broad-scale nuclear and chloroplast DNA  
513 analysis. *American Journal of Botany*, *100*, 1191-1201.
- 514 Takayama, K., Tateishi, Y., Murata, J. I. N., & Kajita, T. (2008). Gene flow and population  
515 subdivision in a pantropical plant with sea-drifted seeds *Hibiscus tiliaceus* and its allied  
516 species: Evidence from microsatellite analyses. *Molecular Ecology*, *17*, 2730-2742.
- 517 CRUZ, M. V. et al. Molecular responses to freshwater limitation in the mangrove tree *Avicennia*  
518 *germinans* (Acanthaceae). **Molecular Ecology**, p. mec.15330, 13 dez. 2019a.
- 519 CRUZ, M. V. et al. Local adaptation of a dominant coastal tree to freshwater availability and  
520 solar radiation suggested by genomic and ecophysiological approaches. **Scientific Reports**, v. 9,  
521 n. 1, p. 19936, 27 dez. 2019b.
- 522
- 523 van der Stocken, T., Carroll, D., Menemenlis, D., Simard, M., & Koedam, N. (2019). Global-  
524 scale dispersal and connectivity in Mangroves. *Proceedings of the National Academy of*  
525 *Sciences of the United States of America*, *116*, 915-922.
- 526 van der Stocken, T., Wee, A. K. S., de Ryck, D. J. R., Vanschoenwinkel, B., Friess, D. A.,  
527 Dahdouh-Guebas, F., . . . Webb, E. L. (2019). A general framework for propagule  
528 dispersal in Mangroves. *Biological Reviews*, *94*, 1547-1575.
- 529 Vieira, M. L. C., Santini, L., Diniz, A. L., & Munhoz, C. D. F. (2016). Microsatellite markers:  
530 What they mean and why they are so useful. *Genetics and Molecular Biology*, *39*, 312-  
531 328.



- 532 Vincent, B., Dionne, M., Kent, M. P., Lien, S., & Bernatchez, L. (2013). Landscape genomics in  
533 atlantic salmon (*Salmo salar*): Searching for gene-environment interactions driving local  
534 adaptation. *Evolution*, *67*, 3469-3487.
- 535 Wang, I. J. (2013). Examining the full effects of landscape heterogeneity on spatial genetic  
536 variation: A multiple matrix regression approach for quantifying geographic and  
537 ecological isolation. *Evolution*, *67*, 3403-3411.
- 538 Wang, I. J., & Bradburd, G. S. (2014). Isolation by environment. *Molecular Ecology*, *23*, 5649-  
539 5662.
- 540 Wang, I. J., Glor, R. E., & Losos, J. B. (2013). Quantifying the roles of ecology and geography  
541 in spatial genetic divergence. *Ecology Letters*, *16*(2), 175-182.
- 542 Wee, A. K. S., Mori, G. M., Lira, C. F., Núñez-Farfán, J., Takayama, K., Faulks, L., . . . Kajita,  
543 T. (2019). The integration and application of genomic information in Mangrove  
544 conservation. *Conservation Biology*, *33*, 206-209.
- 545 Wright, S. (1943). Isolation by distance. *Genetics*, *28*(2), 114-138.
- 546 Wright, S. (1949). The genetical structure of populations. *Annals of Eugenics*, *15*, 323-354.
- 547 Wright, S. (1978). *Evolution and the genetics of populations*. Chicago, IL: University of Chicago  
548 Press.
- 549 Ximenes, A., Ponsoni, L., Lira, C., Koedam, N., & Dahdouh-Guebas, F. (2018). Does sea  
550 surface temperature contribute to determining range limits and expansion of Mangroves  
551 in Eastern South America (Brazil)? *Remote Sensing*, *10*, 1787.
- 552

553 **TABLES**

554 **Table 1.** Collection sites for the samples of *Avicennia germinans* and *A. schaueriana* along the

555 Brazilian Atlantic coast.

| <i>Avicennia schaueriana</i> | Locality (City/State)         | Latitude     | Longitude    | Location in Fig. 1 |
|------------------------------|-------------------------------|--------------|--------------|--------------------|
| PAR                          | Bragança, Pará                | -0.82        | -46.61555556 | 1s                 |
| ALC                          | Alcântara, Maranhão           | -2.410277778 | -44.40611111 | 2s                 |
| PRC                          | Paracuru, Ceará               | -3.413055556 | -39.05638889 | 3s                 |
| VER                          | Vera Cruz, Bahia              | -12.98361111 | -38.68472222 | 4s                 |
| GPM                          | Guapimirim, Rio de Janeiro    | -22.70138889 | -43.00722222 | 5s                 |
| UBA                          | Ubatuba, São Paulo            | -23.48944444 | -45.16444444 | 6s                 |
| CNN                          | Cananéia, São Paulo           | -25.02       | -47.91805556 | 7s                 |
| PPR                          | Pontal do Paraná, Paraná      | -25.575      | -48.3525     | 8s                 |
| FLN                          | Florianópolis, Santa Catarina | -27.57694444 | -48.51888889 | 9s                 |
| LGN                          | Laguna, Santa Catarina        | -28.4451     | -48.84008667 | 10s                |
|                              |                               |              |              |                    |
| <i>Avicennia germinans</i>   | Locality (City/State)         | Latitude     | Longitude    | Location in Fig. 1 |
| MRJ                          | Soure, Pará                   | -0.7238889   | -48.49       | 1g                 |
| PAb                          | Bragança, Pará                | -0.9047222   | -46.6875     | 2g                 |
| ALC                          | Alcântara, Maranhão           | -2.4102778   | -44.40611    | 3g                 |
| PNB                          | Parnaíba, Piauí               | -2.778333    | -41.822222   | 4g                 |
| PRC                          | Paracuru, Ceará               | -3.4130556   | -39.05639    | 5g                 |
| TMD                          | Tamandaré, Pernambuco         | -8.5263889   | -35.01333    | 6g                 |

556

557 **Table 2.** Linear regressions between each environmental variable and genetic distances based on  
 558 the set of molecular markers with evidence of natural selection in *Avicennia schaueriana* and *A.*  
 559 *germinans*.

| Environmental variables                                      | <i>A. schaueriana</i> |               | <i>A. germinans</i> |             |
|--------------------------------------------------------------|-----------------------|---------------|---------------------|-------------|
|                                                              | R <sup>2</sup>        | p - value     | R <sup>2</sup>      | p - value   |
| Annual mean temperature (C°)                                 | 0.45                  | <b>0.0009</b> | 0.81                | <b>0.01</b> |
| Temperature annual range (C°)                                | 0.36                  | <b>0.0004</b> | 0.04                | 0.63        |
| Isothermality (C°)                                           | 0.75                  | <b>0.0005</b> | 0.50                | 0.09        |
| Mean diurnal range (C°)                                      | 0.006                 | 0.74          | 0.24                | 0.27        |
| Max temperature of warmest month (C°)                        | 0.003                 | 0.63          | 0.80                | <b>0.03</b> |
| Annual precipitation (mm)                                    | 0.012                 | 0.54          | 0.09                | 0.33        |
| Precipitation seasonality (mm)                               | 0.56                  | <b>0.0004</b> | 0.24                | 0.28        |
| Precipitation of warmest quarter (mm)                        | 0.31                  | <b>0.008</b>  | 0.91                | 0.06        |
| Precipitation of coldest quarter (mm)                        | 0.39                  | <b>0.01</b>   | 0.008               | 0.88        |
| Mean solar radiation (kJ m <sup>-2</sup> day <sup>-1</sup> ) | 0.44                  | <b>0.0005</b> | 0.63                | <b>0.03</b> |
| Min solar radiation (kJ m <sup>-2</sup> day <sup>-1</sup> )  | 0.49                  | <b>0.0001</b> | 0.03                | 0.58        |
| Max solar radiation (kJ m <sup>-2</sup> day <sup>-1</sup> )  | 0.23                  | <b>0.006</b>  | 0.86                | <b>0.05</b> |
| Wind speed (m s <sup>-1</sup> )                              | 0.037                 | 0.42          | 0.07                | 0.41        |
| Water vapor pressure mean (kPa)                              | 0.53                  | <b>0.0005</b> | 0.085               | 0.45        |
| Mean annual SSS (psu)                                        | 0.00008               | 0.96          | 0.002               | 0.68        |
| SSS of the saltiest month (psu)                              | 0.015                 | 0.48          | 0.096               | 0.23        |
| Annual variance in SSS (psu)                                 | 0.036                 | 0.5           | 0.096               | 0.22        |
| Mean annual SST (C°)                                         | 0.46                  | <b>0.001</b>  | 0.007               | 0.81        |
| SST of the warmest month (C°)                                | 0.27                  | <b>0.005</b>  | 0.014               | 0.93        |

|                                             |      |               |       |               |
|---------------------------------------------|------|---------------|-------|---------------|
| Annual average cycle amplitude (cm)         | 0.62 | <b>0.0007</b> | 0.12  | <b>0.0006</b> |
| Annual average duration of tidal cycles (h) | 0.1  | 0.12          | 0.035 | 0.74          |

560 Significant values are presented in bold. \*SST = sea surface temperature. \*SSS = sea surface

561 salinity

562

563 **FIGURE LEGENDS**

564 **Fig. 1.** Map showing the geographical distribution of *Avicennia schaueriana* (pink) and its  
565 sympatric region with *A. germinans* (pink and yellow) on the South Atlantic coast and the  
566 geographic locations of collection sites for the *A. schaueriana* (green circles) and *A. germinans*  
567 (red circles) plant material used for genetic analyses ((Cruz, Mori, Müller, et al., 2019; Cruz,  
568 Mori, Oh, et al., 2019). Sampling locations are displayed according to Table 1. Arrows represent  
569 the direction of the main ocean currents acting on the Brazilian coast. Arrow widths illustrate the  
570 mean current speed (Lumpkin & Johnson, 2013).

571 **Fig. 2.** Intropopulation genetic differentiation based on the total set of molecular markers  
572 estimated by a pairwise  $F_{ST}$  (Wright) for (A) *A. schaueriana* and (B) *A. germinans* collection  
573 sites.

574 **Fig. 3.** Dendrograms showing the groups (red boxes) of correlated ( $R^2 > 0.8$ ) environmental  
575 variables retrieved from public data platforms: (A) WorldClim version 1.4, (B) WorldClim  
576 version 2.0 (Fick & Hijmans, 2017), (C) Marspec (Sbrocco & Barber, 2013), and (D) ECDS  
577 (Klein et al., 2013).

578 **Fig. 4.** Principal component analysis based on Euclidean distances estimated from a matrix of 21  
579 environmental variables for sampling sites of (A) *A. schaueriana* and (B) *A. germinans*. The  
580 acronyms for sampling locations are the same as those in Table 1.

581 **Fig. 5.** Contribution of noncollinear environmental variables to the first principal component of  
582 the PCA for (A) *A. schaueriana* and (B) *A. germinans*. \*SST = Sea surface temperature. \*SSS =  
583 Sea surface salinity.

584 **Fig. 6.** Linear regressions (blue lines) and standard deviation (gray shadow) of pairwise  
585 comparisons of sampling locations (A) between geographic and environmental distances, (B)

586 between geographic and genetic distances and (C) between environmental and genetic distances  
587 for *A. schaueriana* and (D) between geographic and environmental distances, (E) between  
588 geographic and genetic distances and (F) between environmental and genetic distances for *A.*  
589 *germinans*.

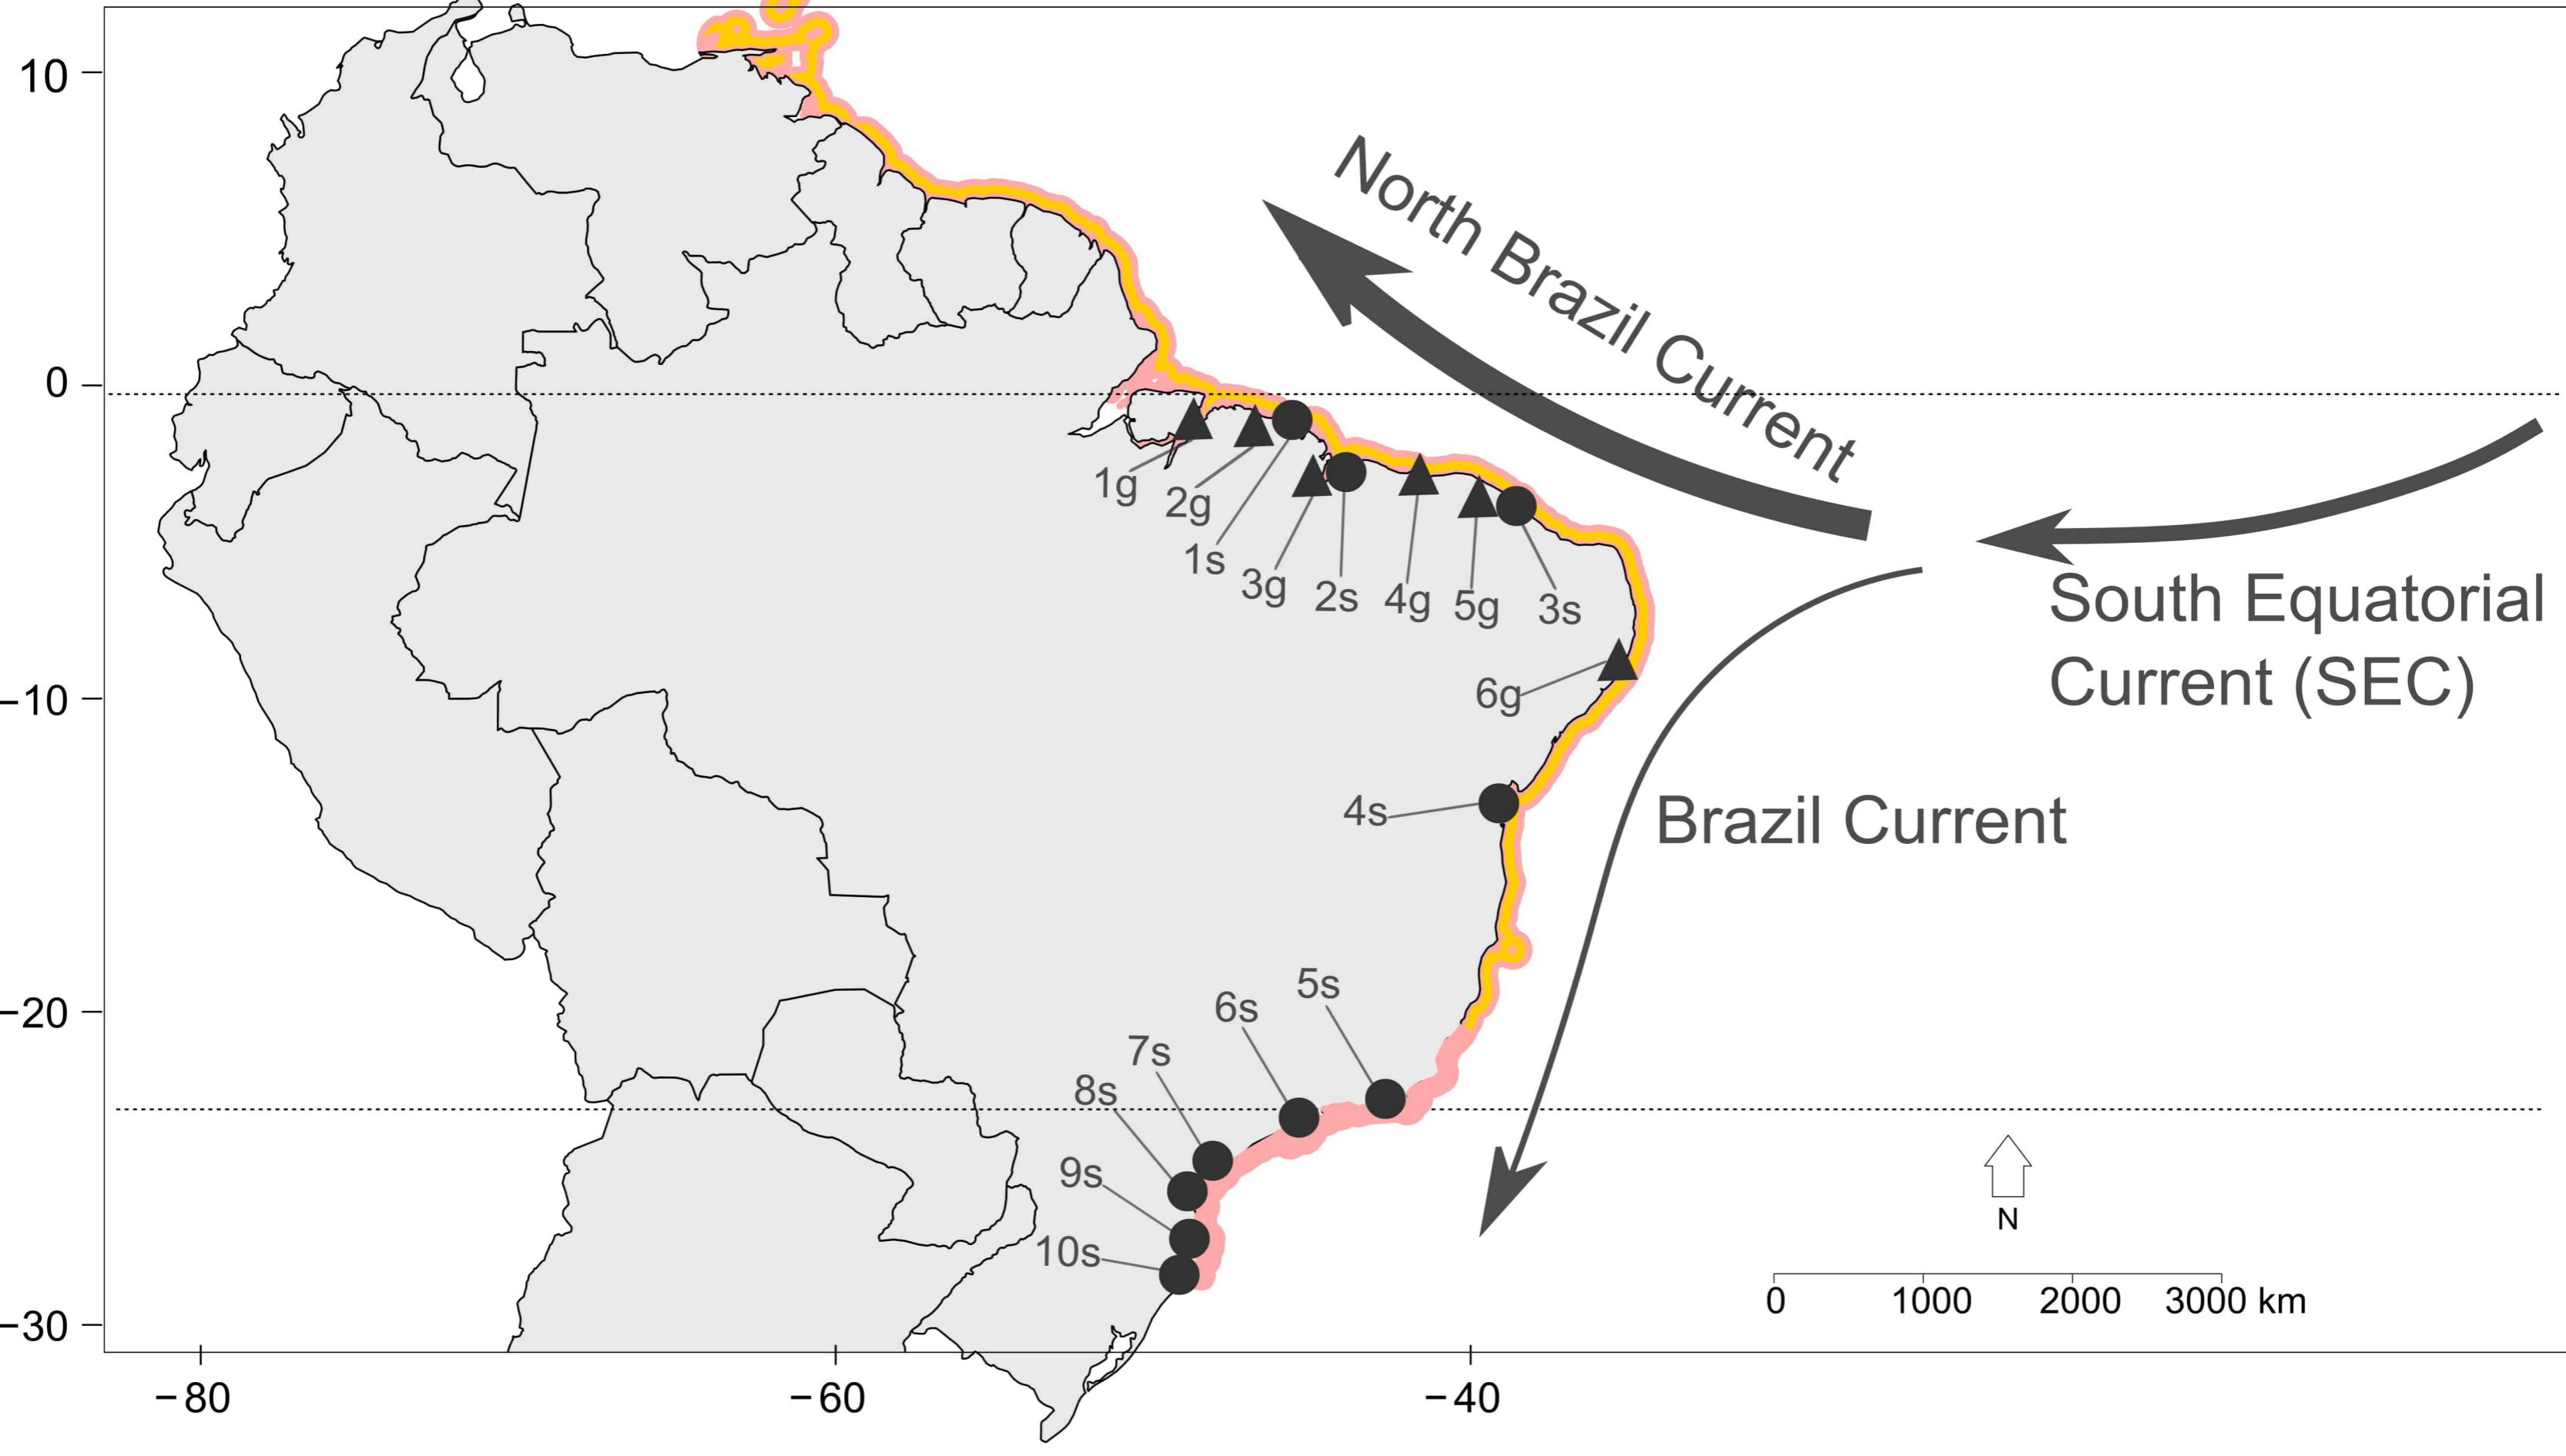

A

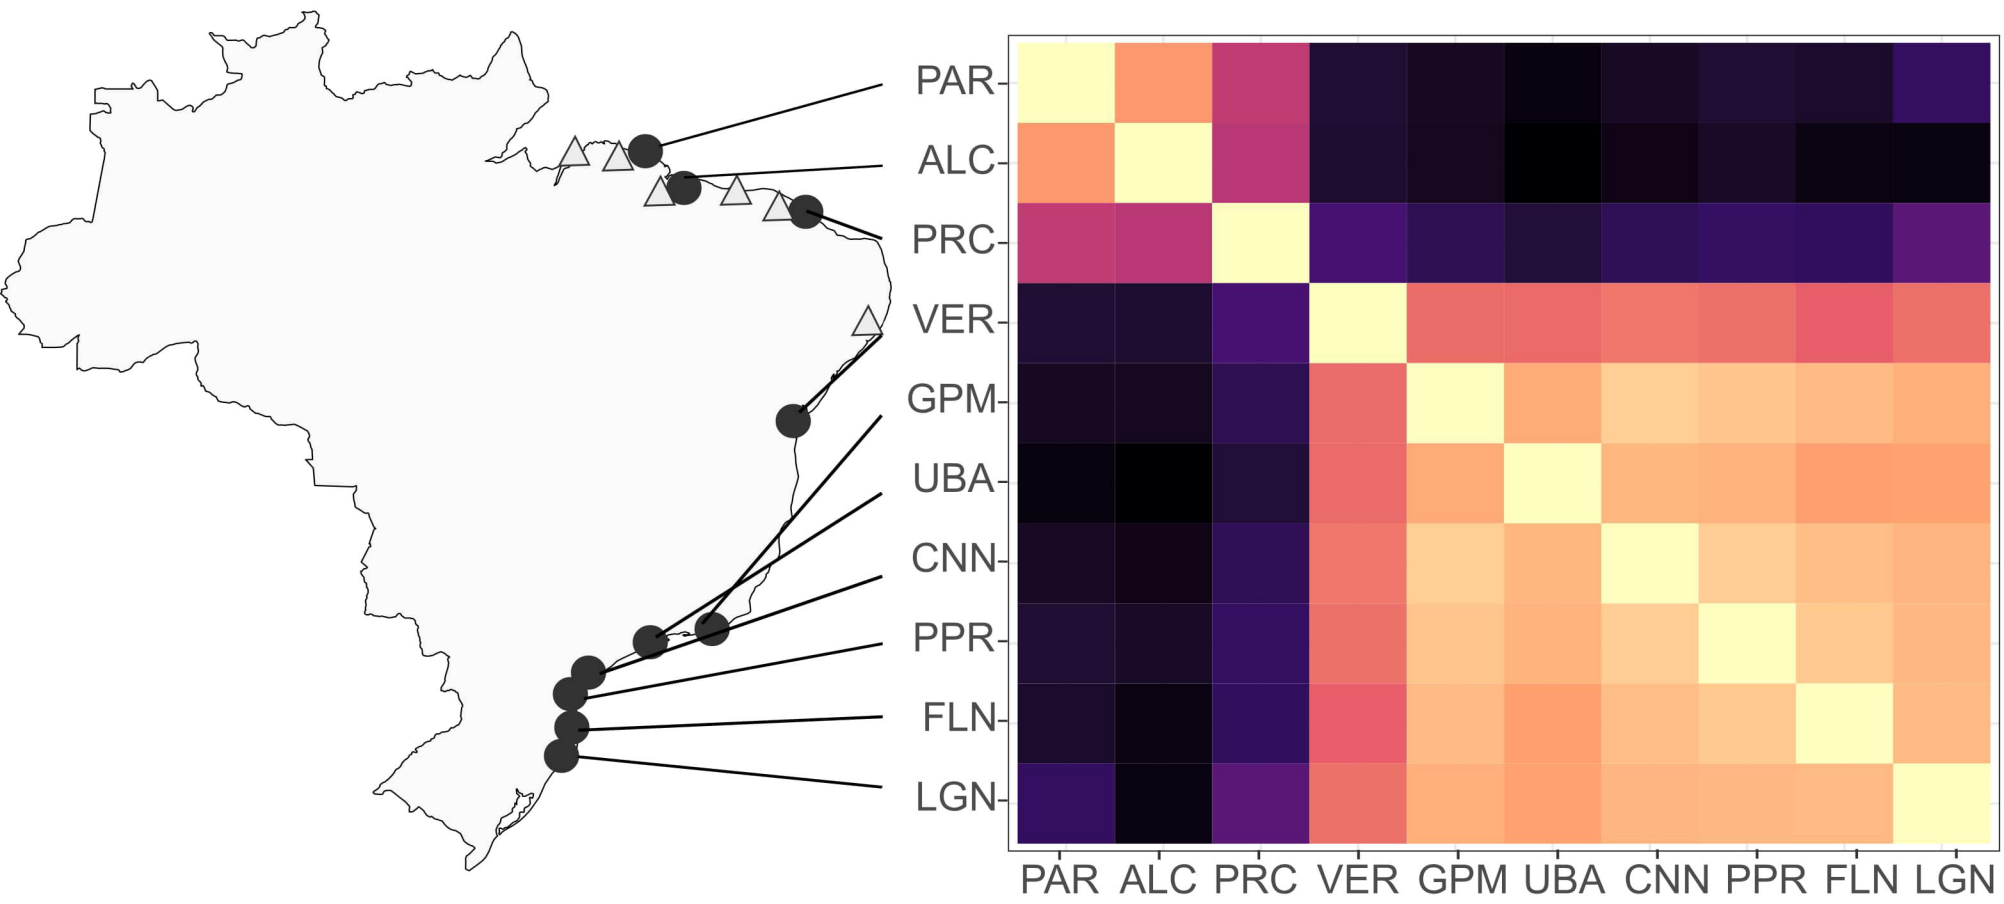

B

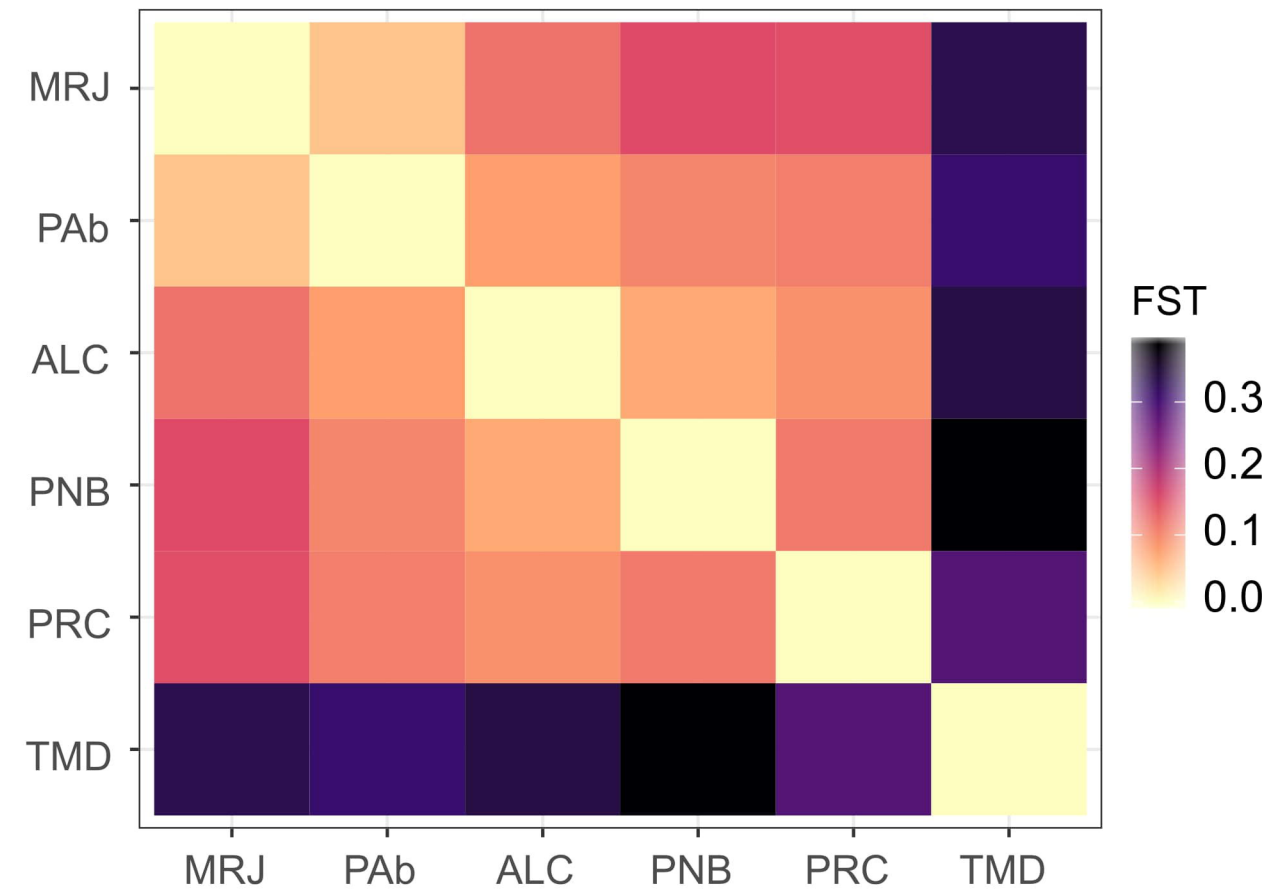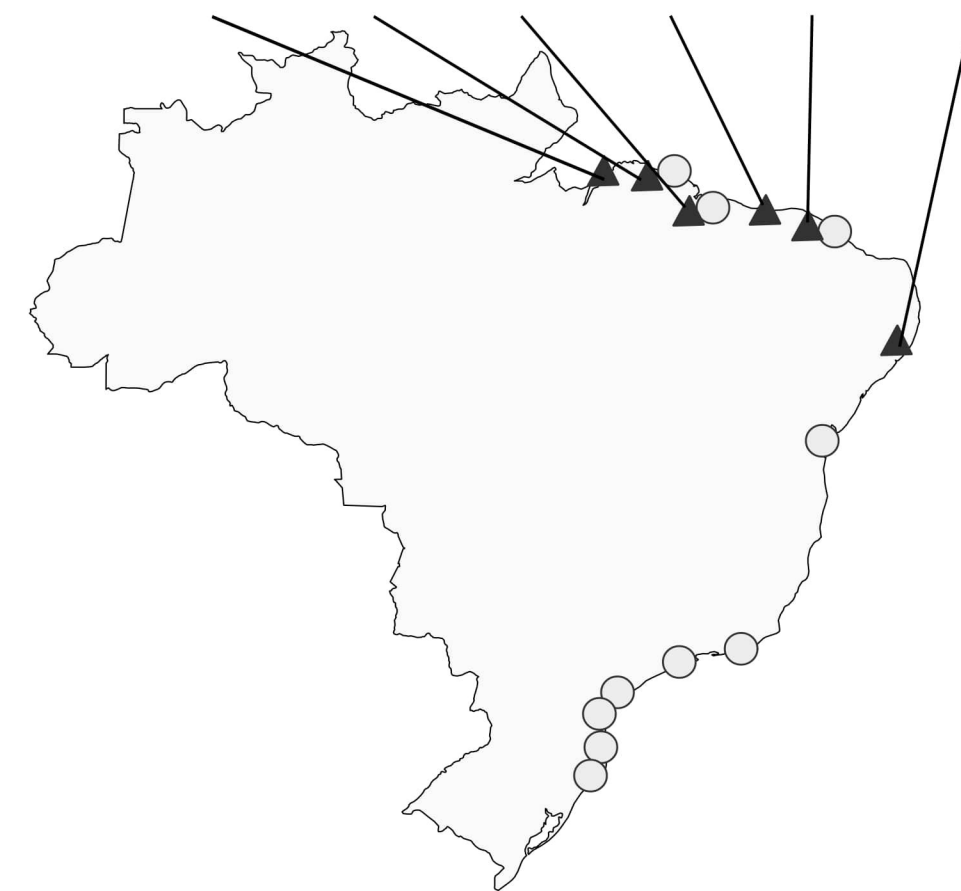



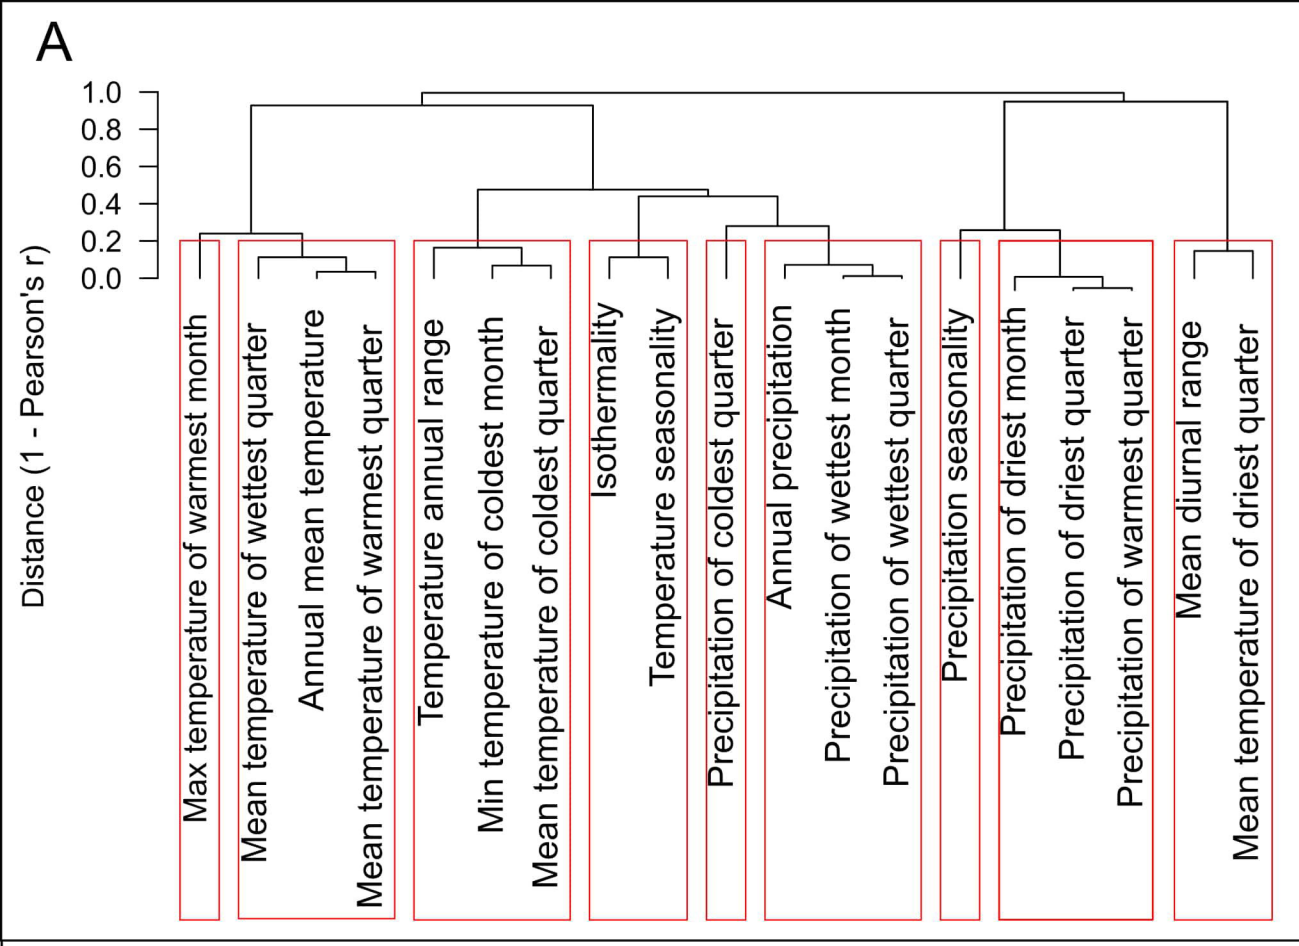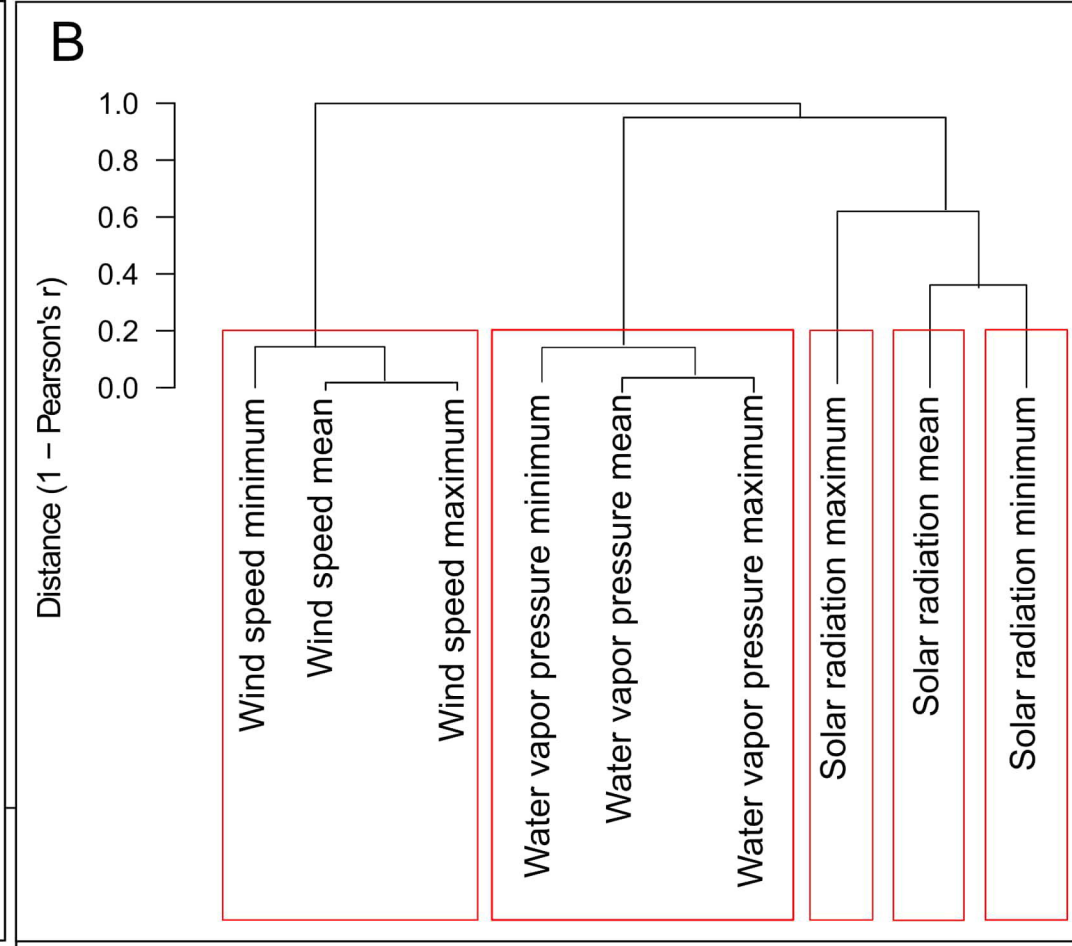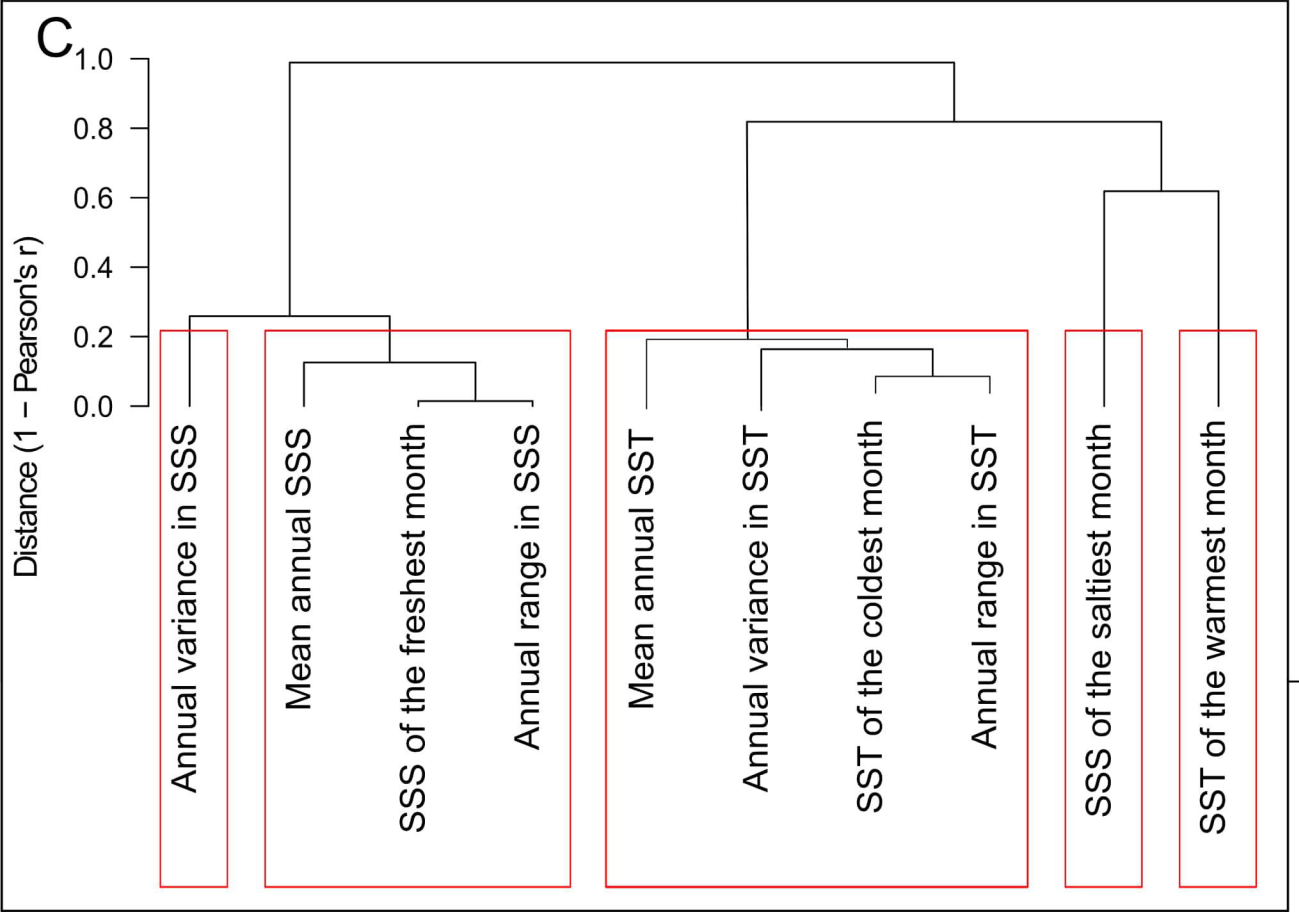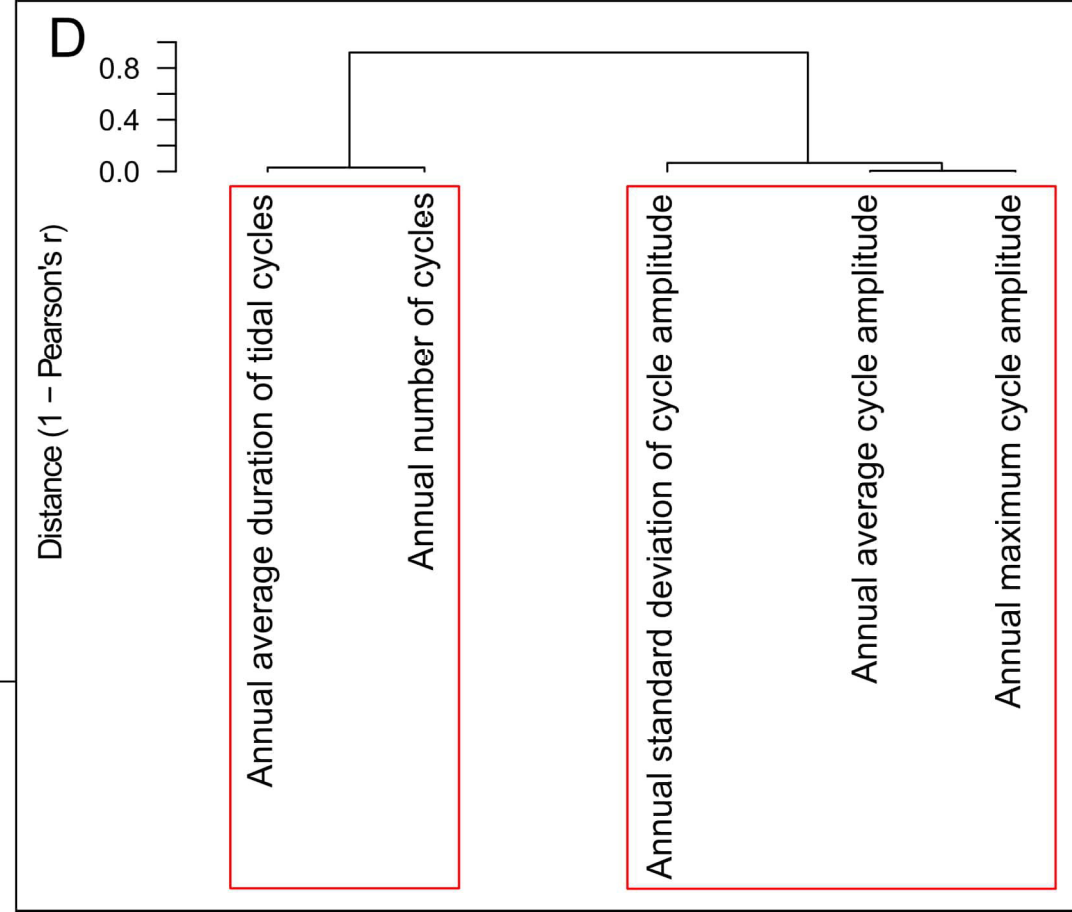

**A**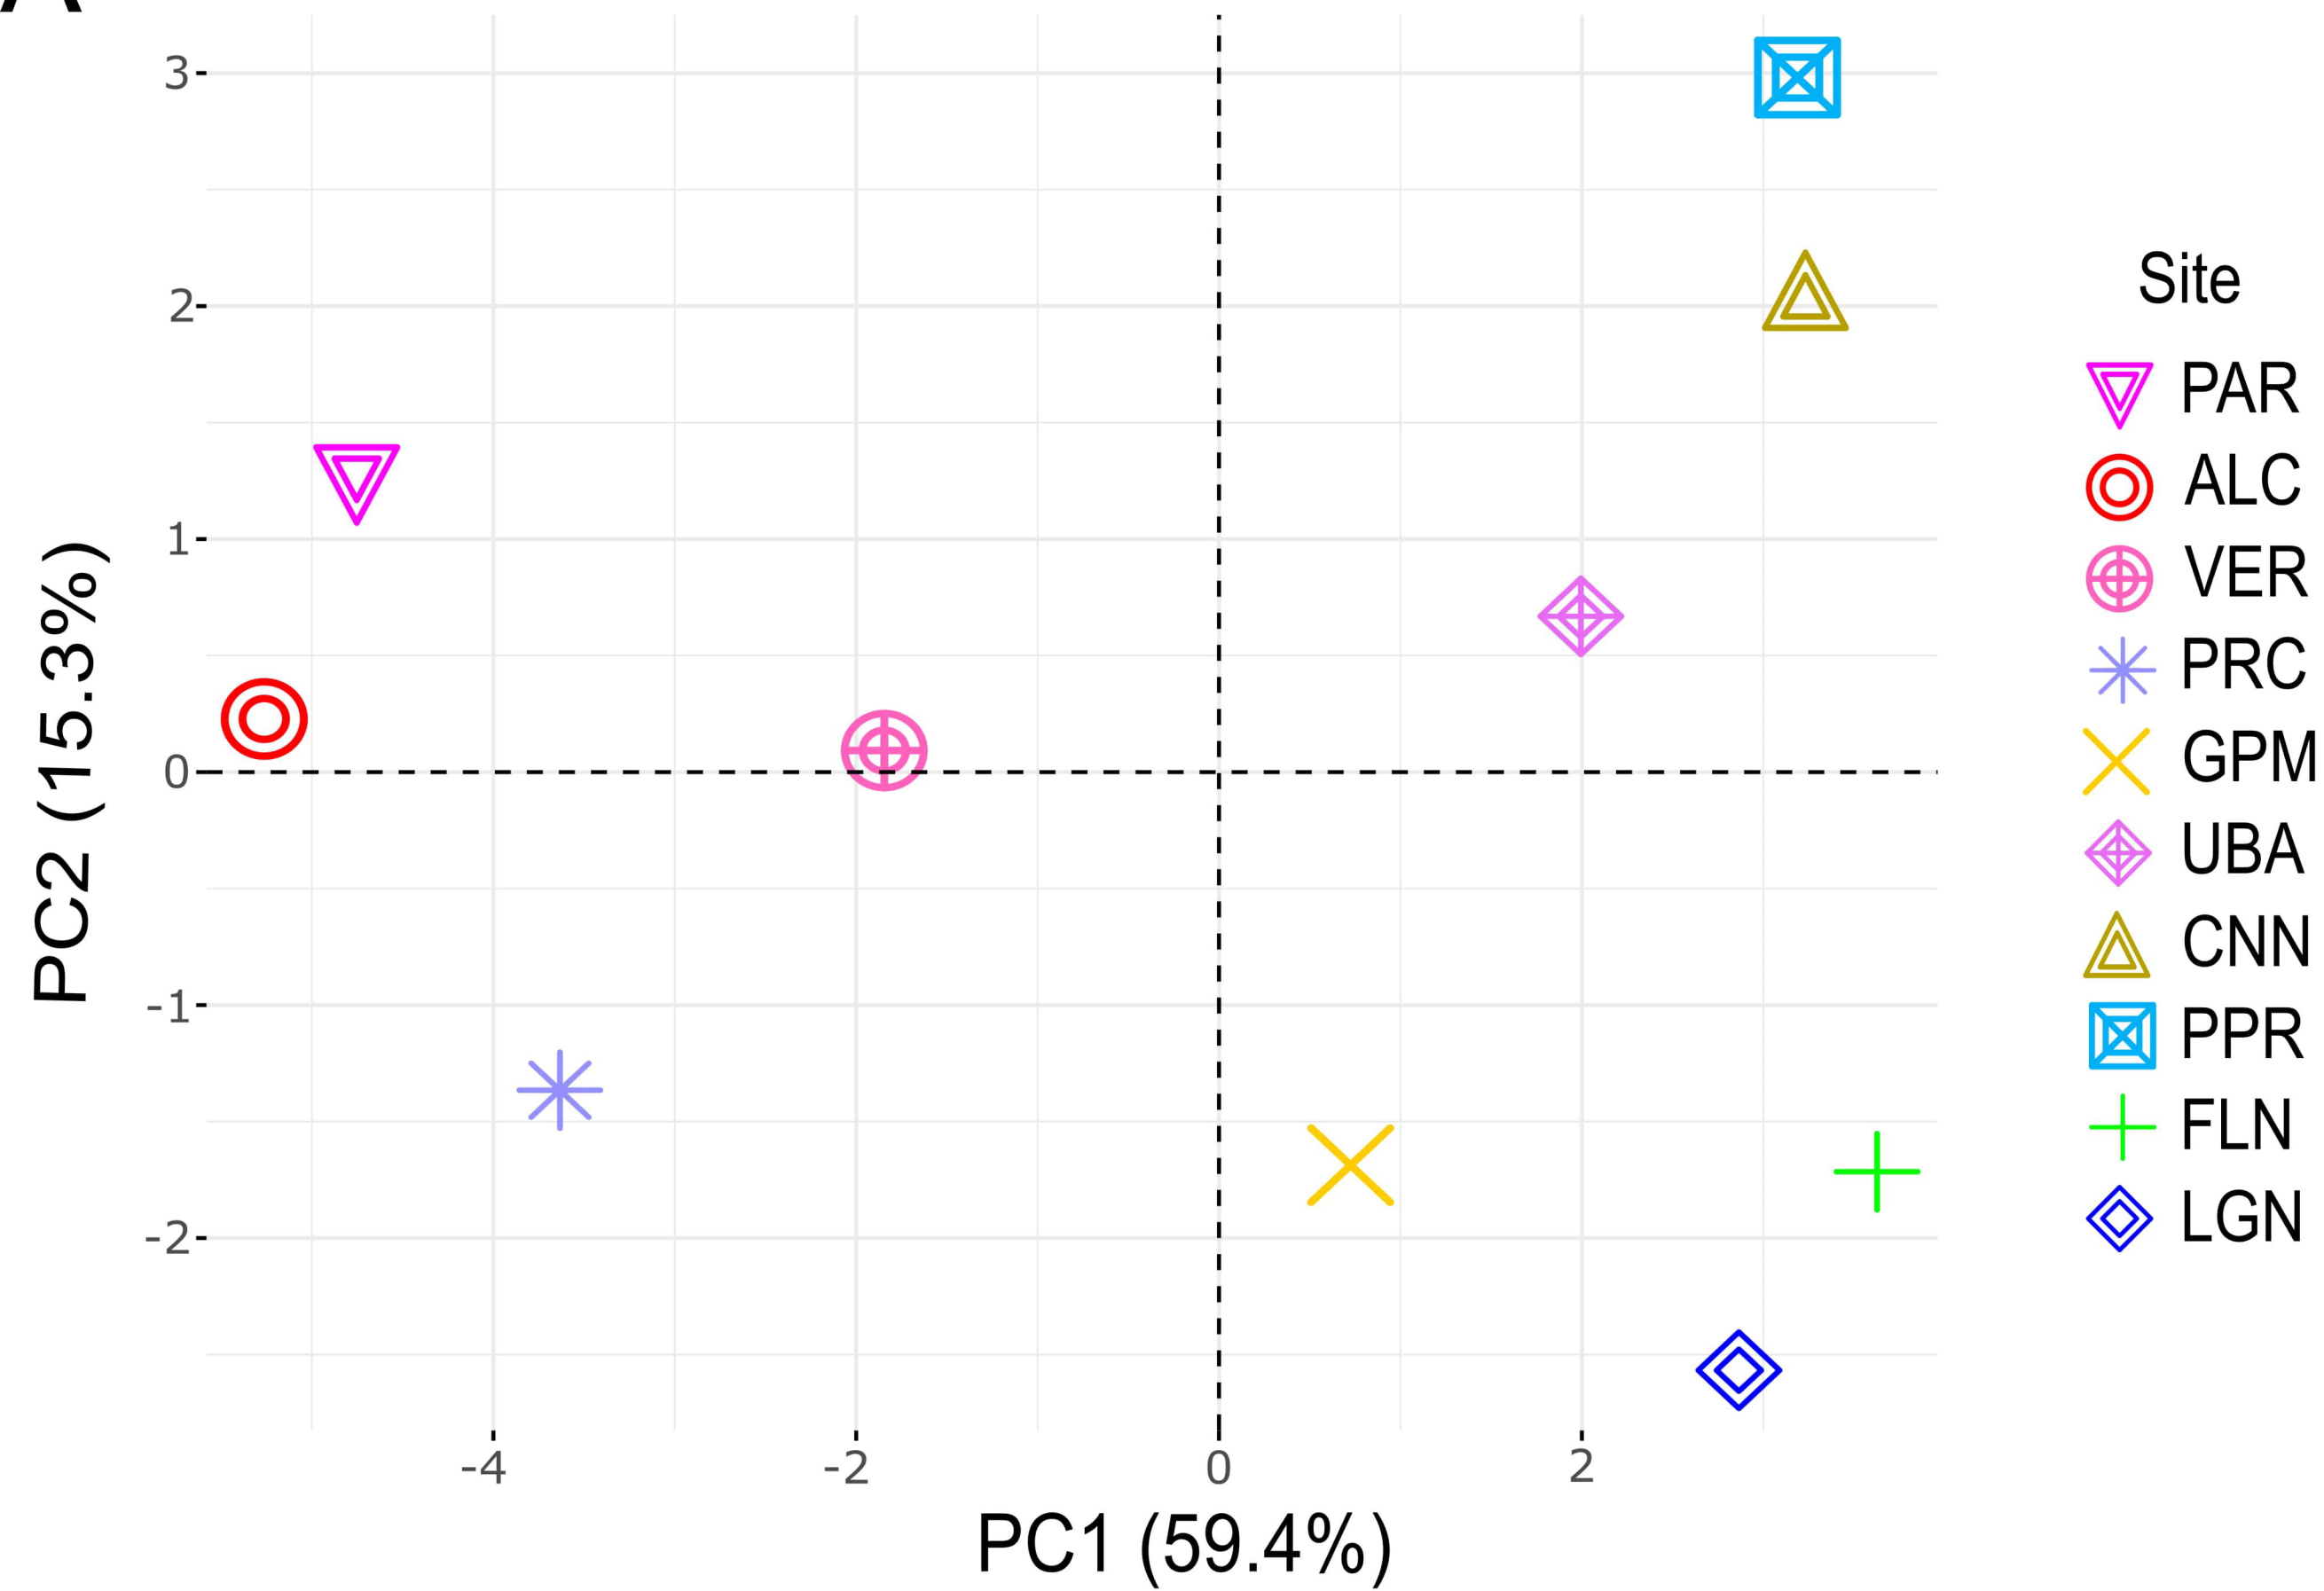**B**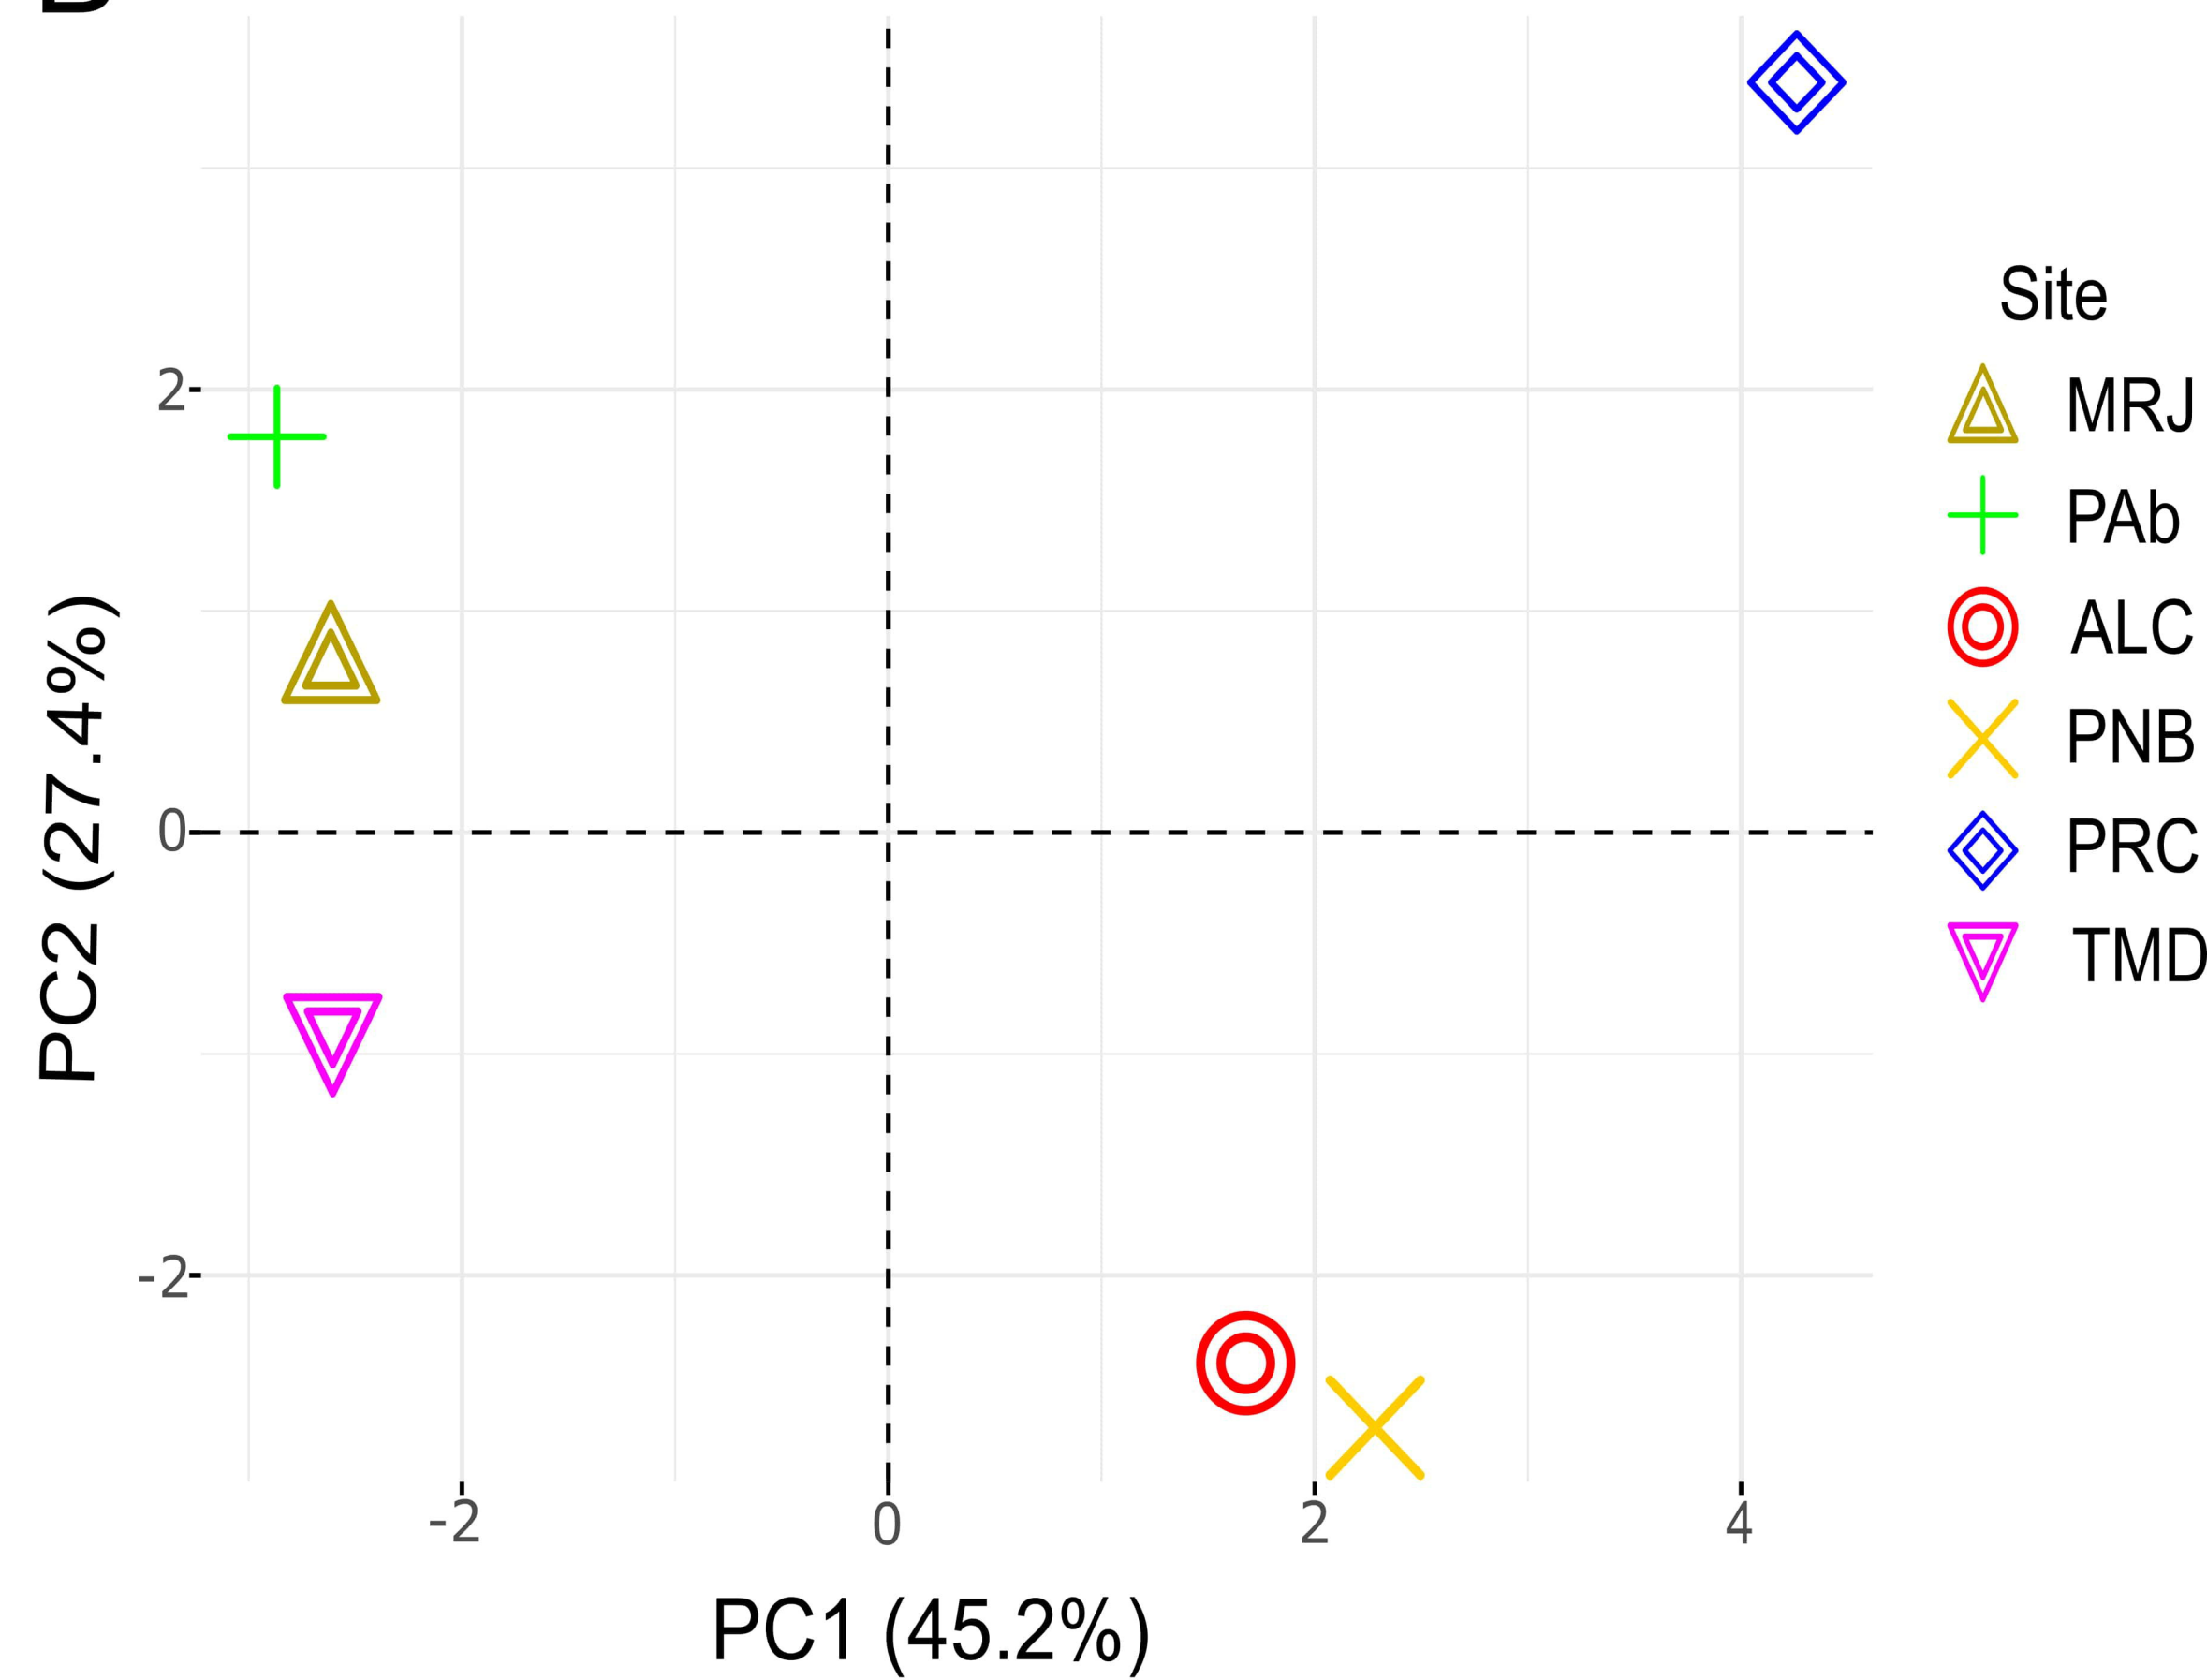

### Loading Plot for PC1 *A. schaueriana*

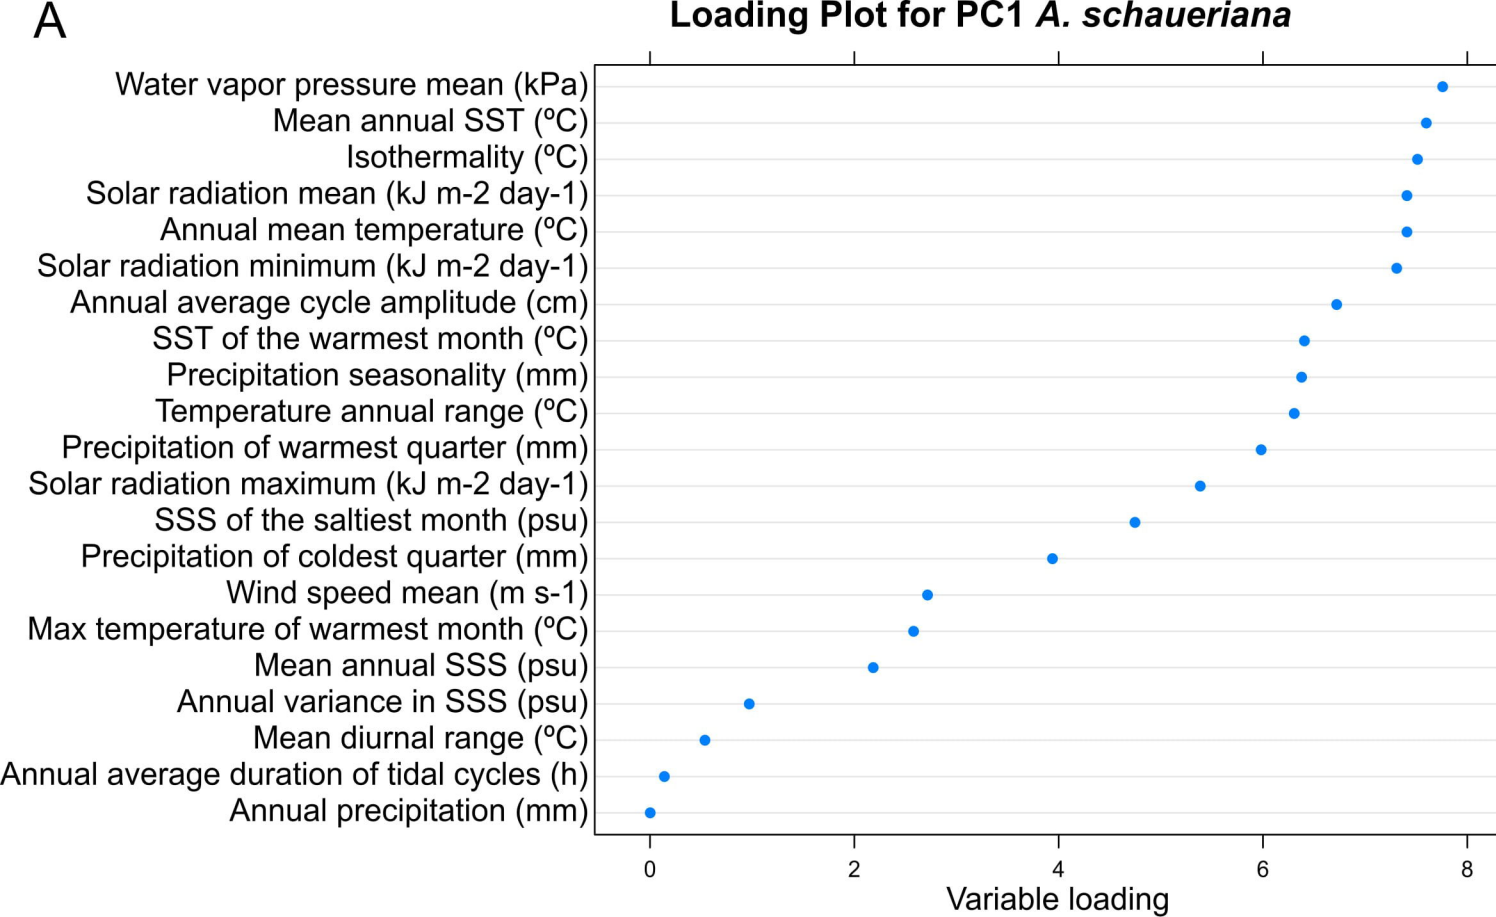

### Loading Plot for PC1 *A. germinans*

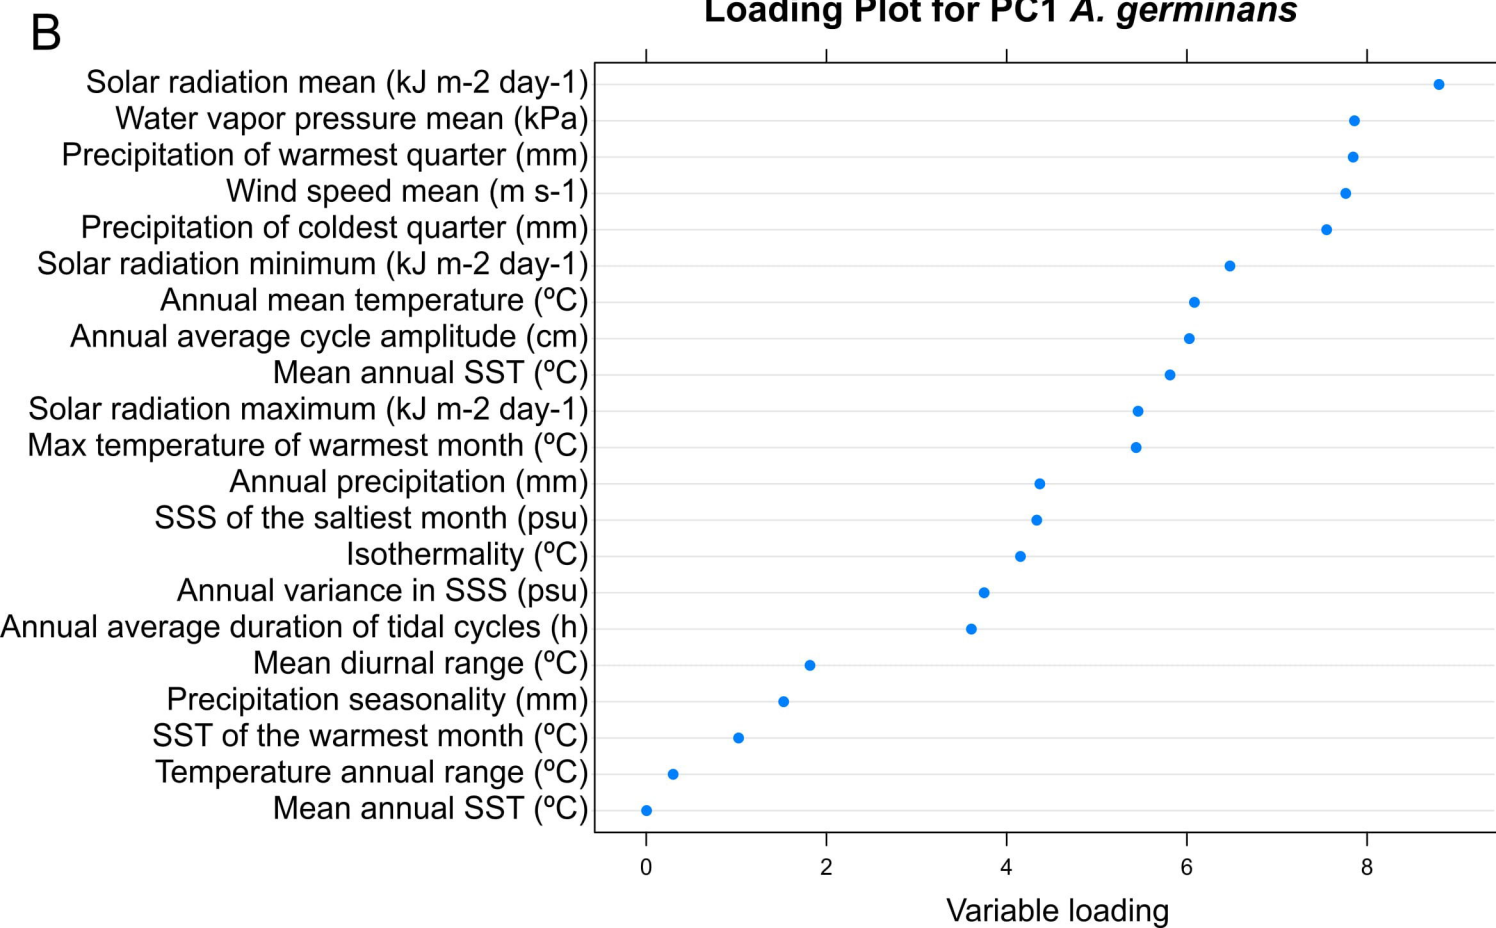

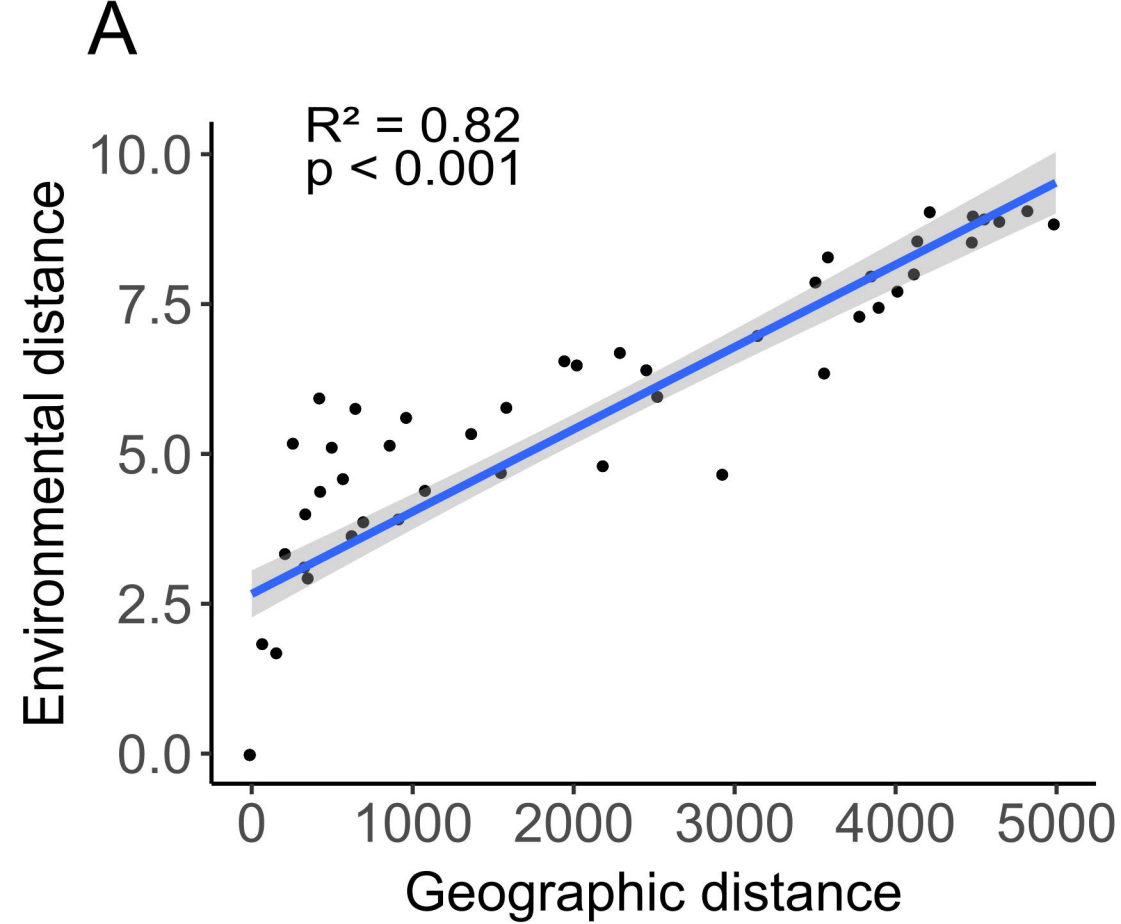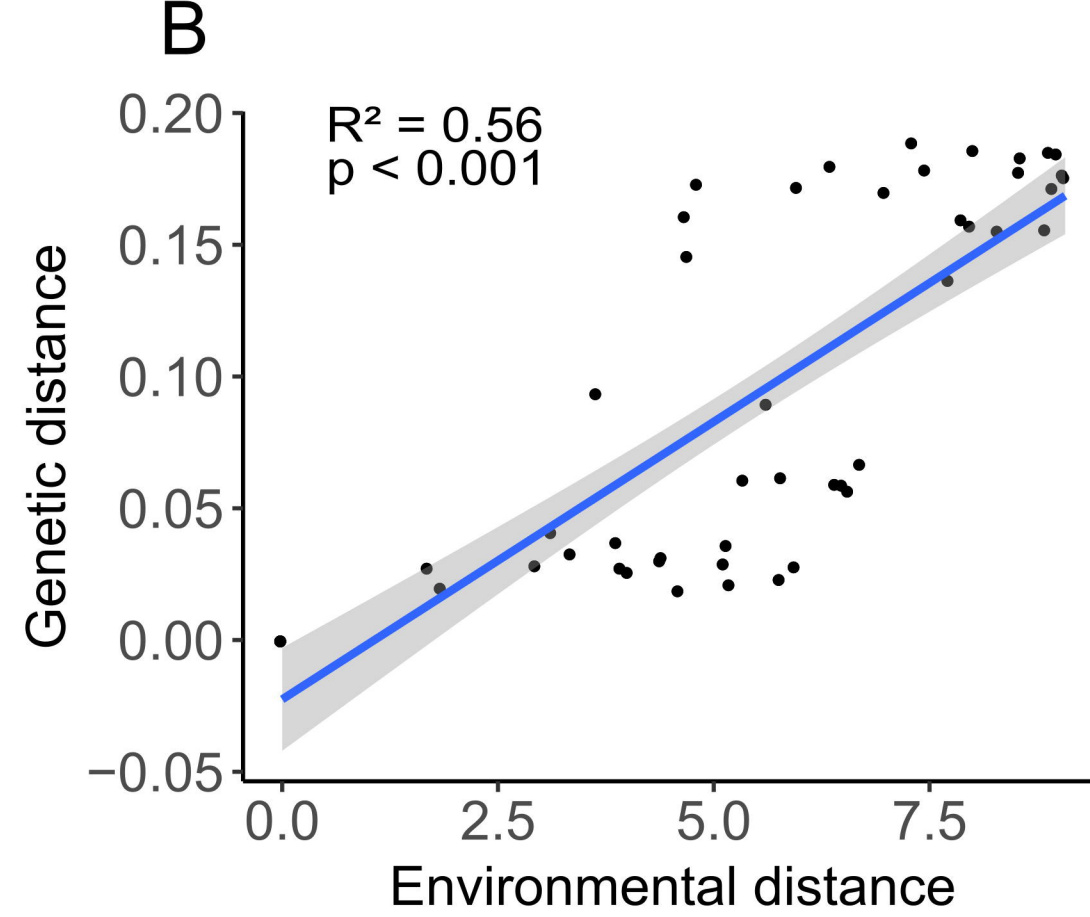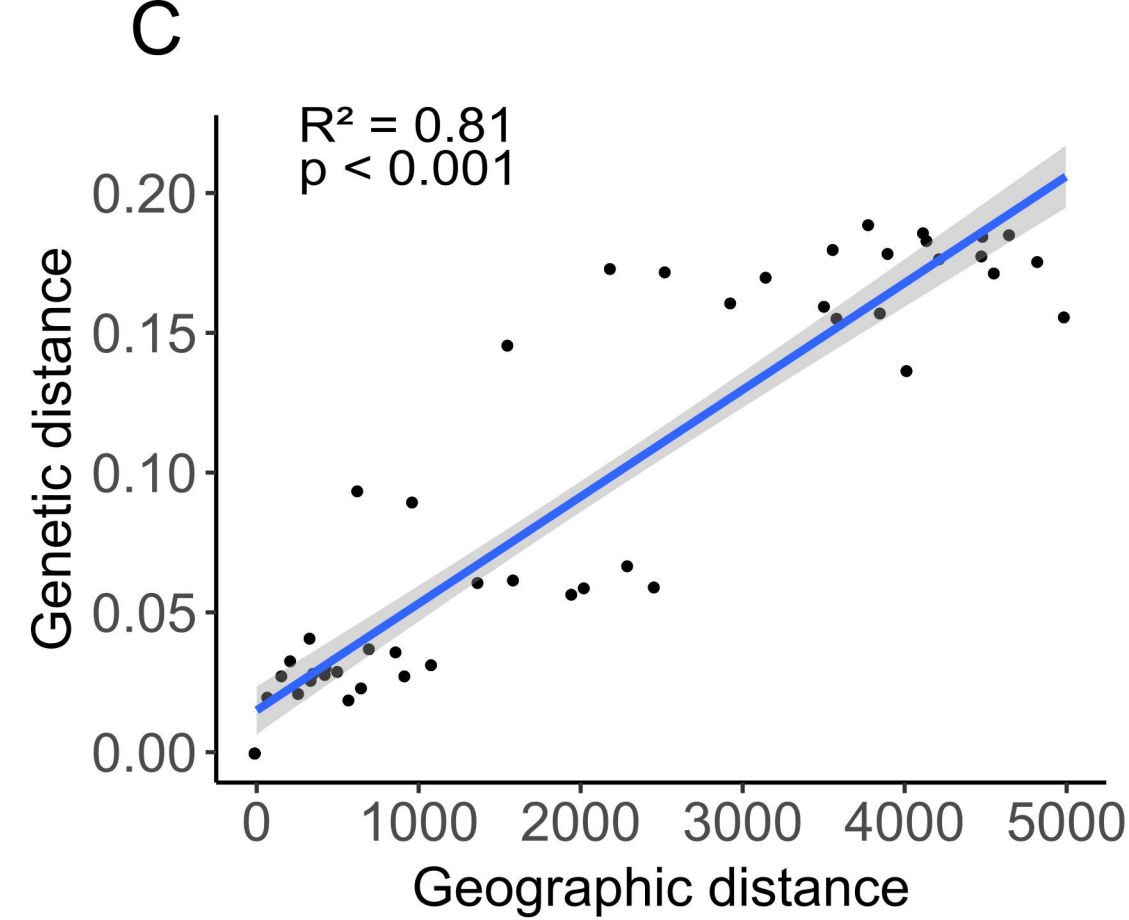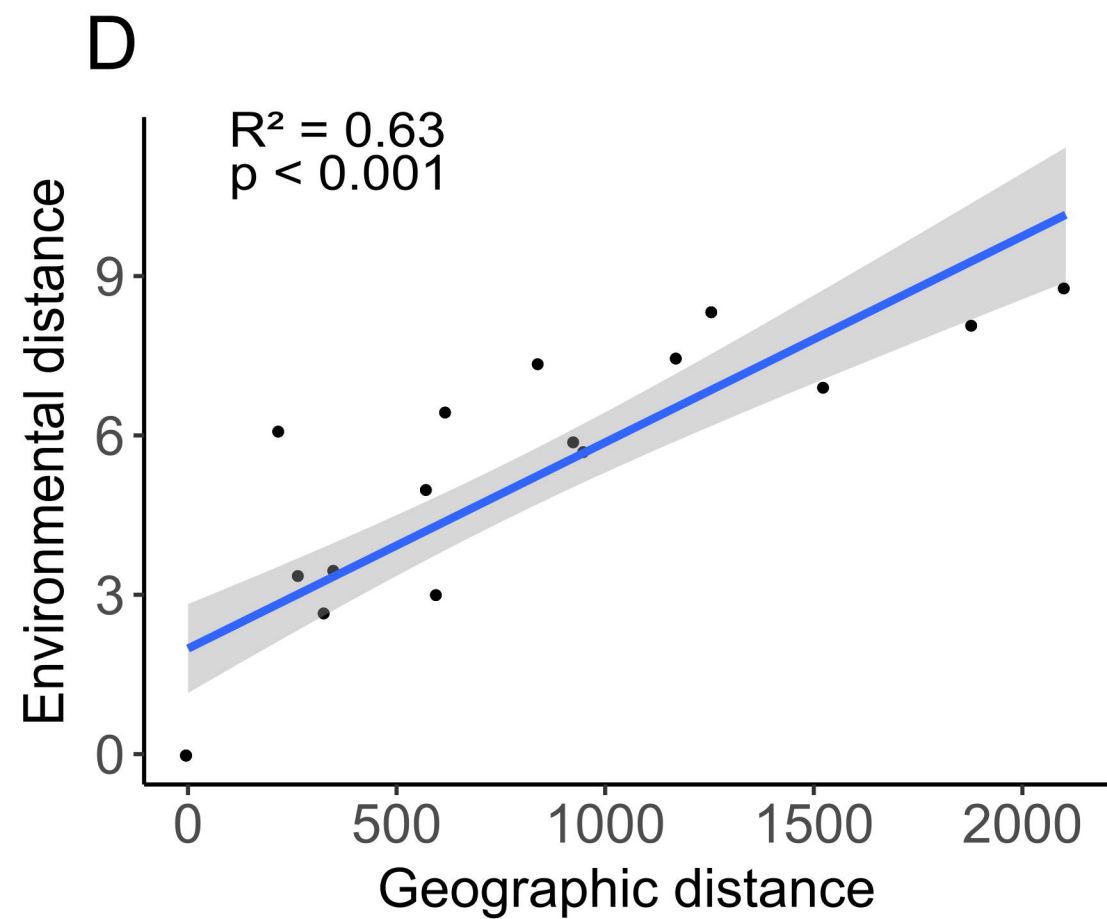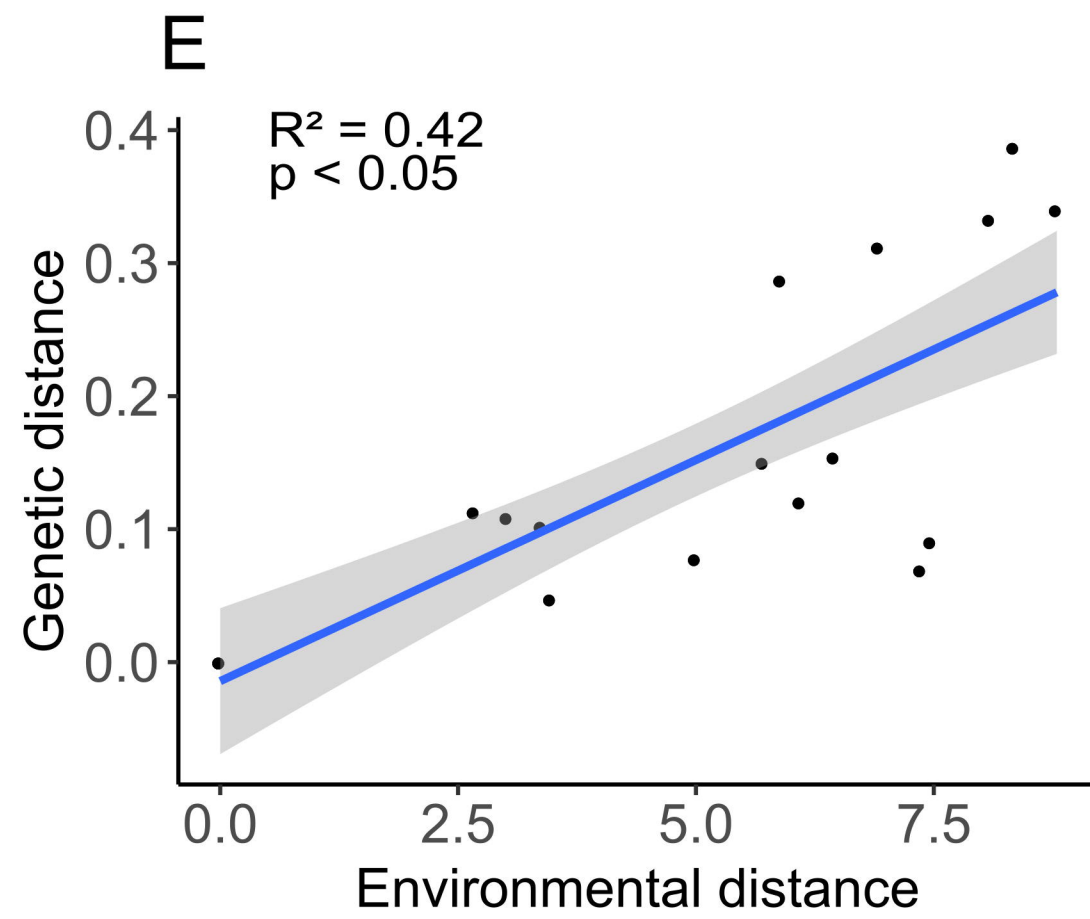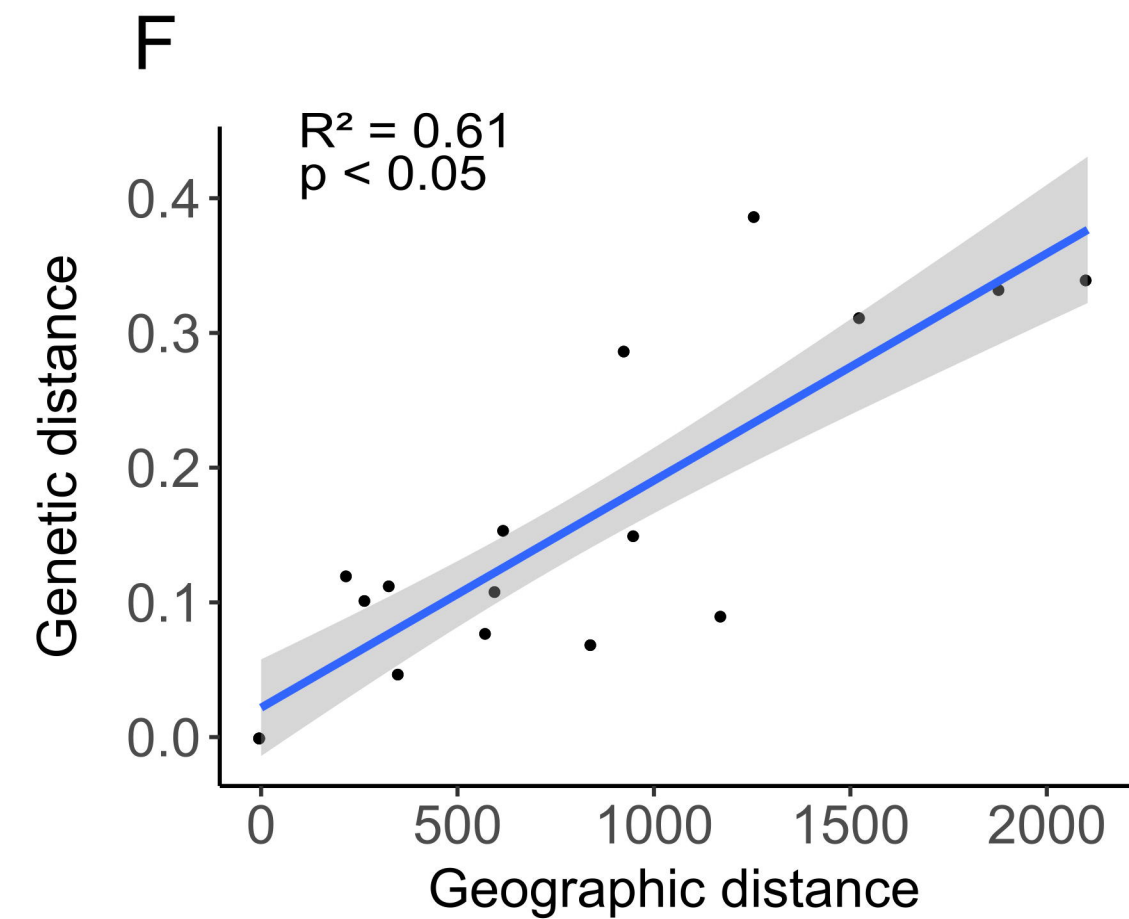

Source: https://www.biorxiv.org/content/10.1101/2020.01.08.889717v1.full.pdf
